# Supplementary material for: Nickel(ii)-catalyzed C(sp2)–H sulfuration/annulation with elemental sulfur: selective access to benzoisothiazolones
Source: Royal Society of Chemistry journal article supplement (doi:10.1039/c9ob00449a), 2019-01-01

## Supporting Information

### **Nickel(II)-catalyzed C(sp<sup>2</sup>)-H sulfuration/annulation with elemental sulfur: selective access to benzoisothiazolones**

Jun-Ru Guo, Jun-Fang Gong\* and Mao-Ping Song\*

*College of Chemistry and Molecular Engineering, Henan Key Laboratory of Chemical Biology and Organic Chemistry, Zhengzhou University, Zhengzhou 450001, People's Republic of China*

E-mail: gongjf@zzu.edu.cn (J.-F. Gong) or mpsong@zzu.edu.cn (M.-P. Song).

#### **Table of Contents**

|                                           |     |
|-------------------------------------------|-----|
| Preparation of amide substrates .....     | S2  |
| Optimization of reaction conditions ..... | S6  |
| Crystal reports for <b>2a</b> .....       | S7  |
| Kinetic isotope experiments .....         | S10 |
| References .....                          | S11 |
| Spectra .....                             | S12 |

## Preparation of amide substrates

Benzamides **1** were prepared by the known method.<sup>1</sup> **1a-1c, 1f, 1h, 1i, 1l, 1q, 1s** and **1aa** were known compounds, **1d, 1e, 1g, 1j, 1k, 1m-1p, 1r, 1t-1z**, and **1ab** were new compounds. Other chemical reagents were commercially available and used without further purification.

**4-Bromo-*N*-(2-(1-methyl-1*H*-benzo[*d*]imidazol-2-yl)propan-2-yl)benzamide (1d).**  $R_f = 0.3$  (Petroleum ether/EtOAc = 1/1). White solid (1.024 g, 55% yield), m.p. 192-193 °C. <sup>1</sup>H NMR (400 MHz, CDCl<sub>3</sub>)  $\delta$ : 8.49 (s, 1H), 7.82 – 7.73 (m, 3H), 7.65 – 7.58 (m, 2H), 7.37 – 7.27 (m, 3H), 3.92 (s, 3H), 2.04 (s, 6H); <sup>13</sup>C{<sup>1</sup>H} NMR (100 MHz, CDCl<sub>3</sub>)  $\delta$ : 165.0, 157.1, 140.7, 137.4, 134.0, 131.8, 128.7, 126.1, 122.9, 122.4, 119.6, 109.2, 54.4, 31.9, 25.7. HRMS (positive ESI): [M+H]<sup>+</sup> calcd for C<sub>18</sub>H<sub>19</sub>BrN<sub>3</sub>O<sup>+</sup>: 372.0706, found 372.0709.

**4-Iodo-*N*-(2-(1-methyl-1*H*-benzo[*d*]imidazol-2-yl)propan-2-yl)benzamide (1e).**  $R_f = 0.2$  (Petroleum ether/EtOAc = 1/1). White solid (1.048 g, 50% yield), m.p. 197-199 °C. <sup>1</sup>H NMR (400 MHz, CDCl<sub>3</sub>)  $\delta$ : 8.46 (s, 1H), 7.84 – 7.80 (m, 2H), 7.79 – 7.45 (m, 1H), 7.66 – 7.59 (m, 2H), 7.35 – 7.27 (m, 3H), 3.91 (s, 3H), 2.03 (s, 6H); <sup>13</sup>C{<sup>1</sup>H} NMR (100 MHz, CDCl<sub>3</sub>)  $\delta$ : 165.2, 157.2, 140.7, 137.8, 137.4, 134.6, 128.7, 122.9, 122.4, 119.6, 109.3, 98.4, 54.3, 31.9, 25.6. HRMS (positive ESI): [M+H]<sup>+</sup> calcd for C<sub>18</sub>H<sub>19</sub>IN<sub>3</sub>O<sup>+</sup>: 420.0567, found 420.0574.

***N*-(2-(1-methyl-1*H*-benzo[*d*]imidazol-2-yl)propan-2-yl)-4-nitrobenzamide (1g).**  $R_f = 0.3$  (Petroleum ether/EtOAc = 1/1). White solid (0.845 g, 50% yield), m.p. 189-191 °C. <sup>1</sup>H NMR (400 MHz, CDCl<sub>3</sub>)  $\delta$ : 9.05 (s, 1H), 8.35 (d,  $J = 8.8$  Hz, 2H), 8.10 (d,  $J = 8.8$  Hz, 2H), 7.82 – 7.73 (m, 1H), 7.41 – 7.29 (m, 3H), 3.96 (s, 3H), 2.08 (s, 6H); <sup>13</sup>C{<sup>1</sup>H} NMR (100 MHz, CDCl<sub>3</sub>)  $\delta$ : 163.7, 157.0, 149.6, 141.0, 140.3, 137.5, 128.2, 123.8, 123.1, 122.6, 119.6, 109.4, 54.7, 32.0, 25.1. HRMS (positive ESI): [M+H]<sup>+</sup> calcd for C<sub>18</sub>H<sub>19</sub>N<sub>4</sub>O<sub>3</sub><sup>+</sup>: 339.1452, found 339.1455.

***N*-(2-(1-methyl-1*H*-benzo[*d*]imidazol-2-yl)propan-2-yl)-[1,1'-biphenyl]-4-carboxamide (1j).**  $R_f = 0.3$  (Petroleum ether/EtOAc = 1/1). White solid (1.126 g, 61% yield), m.p. 230-232 °C. <sup>1</sup>H NMR (400 MHz, CDCl<sub>3</sub>)  $\delta$ : 8.25 (s, 1H), 7.97 (d,  $J = 8.4$  Hz, 2H), 7.81 – 7.77 (m, 1H), 7.70 (d,  $J = 8.4$  Hz, 2H), 7.66 – 7.61 (m, 2H), 7.51 – 7.45 (m, 2H), 7.42 – 7.27 (m, 4H), 3.93 (s, 3H), 2.06 (s, 6H); <sup>13</sup>C{<sup>1</sup>H} NMR (100 MHz, CDCl<sub>3</sub>)  $\delta$ : 165.7, 157.3, 144.3,

140.9, 140.1, 137.4, 133.7, 128.9, 128.0, 127.5, 127.3, 127.2, 122.8, 122.3, 119.7, 109.2, 54.3, 31.9, 26.0. HRMS (positive ESI):  $[M+H]^+$  calcd for  $C_{24}H_{24}N_3O^+$ : 370.1914, found 370.1918.

**4-Isopropyl-*N*-(2-(1-methyl-1*H*-benzo[*d*]imidazol-2-yl)propan-2-yl)benzamide (1k).**  $R_f = 0.3$  (Petroleum ether/EtOAc = 1/1). White solid (0.906 g, 54% yield), m.p. 190-192 °C.  $^1H$  NMR (400 MHz,  $CDCl_3$ )  $\delta$ : 8.01 (s, 1H), 7.82 (d,  $J = 8.3$  Hz, 2H), 7.79 – 7.76 (m, 1H), 7.35 – 7.25 (m, 5H), 3.91 (s, 3H), 3.30 – 2.89 (m, 1H), 2.03 (s, 6H), 1.28 (d,  $J = 6.9$  Hz, 6H);  $^{13}C\{^1H\}$  NMR (100 MHz,  $CDCl_3$ )  $\delta$ : 166.0, 157.2, 152.8, 141.0, 137.3, 132.5, 127.1, 126.7, 122.7, 122.2, 119.7, 109.1, 54.1, 34.1, 31.8, 26.2, 23.8. HRMS (positive ESI):  $[M+H]^+$  calcd for  $C_{21}H_{26}N_3O^+$ : 336.2070, found 332.2074.

**3-Fluoro-*N*-(2-(1-methyl-1*H*-benzo[*d*]imidazol-2-yl)propan-2-yl)benzamide (1m).**  $R_f = 0.3$  (Petroleum ether/EtOAc = 1/1). White solid (1.183 g, 76% yield), m.p. 222-225 °C.  $^1H$  NMR (400 MHz,  $CDCl_3$ )  $\delta$ : 8.49 (s, 1H), 7.81 – 7.75 (m, 1H), 7.71 – 7.66 (m, 1H), 7.65 – 7.60 (m, 1H), 7.49 – 7.43 (m, 1H), 7.36 – 7.27 (m, 3H), 7.25 – 7.19 (m, 1H), 3.93 (s, 3H), 2.05 (s, 6H);  $^{13}C\{^1H\}$  NMR (100 MHz,  $CDCl_3$ )  $\delta$ : 164.6, 162.9 (d,  $J_{C-F} = 246.2$  Hz), 157.1, 140.7, 137.5 (d,  $J_{C-F} = 6.6$  Hz), 137.4, 130.2 (d,  $J_{C-F} = 7.8$  Hz), 122.9, 122.5 (d,  $J_{C-F} = 2.8$  Hz), 122.4, 119.7, 118.4 (d,  $J_{C-F} = 21.2$  Hz), 114.4 (d,  $J_{C-F} = 22.7$  Hz), 109.2, 54.4, 31.9, 25.6;  $^{19}F$  NMR (376 MHz,  $CDCl_3$ )  $\delta$ : -111.9. HRMS (positive ESI):  $[M+H]^+$  calcd for  $C_{18}H_{19}FN_3O^+$ : 312.1507, found 312.1509.

**3-Chloro-*N*-(2-(1-methyl-1*H*-benzo[*d*]imidazol-2-yl)propan-2-yl)benzamide (1n).**  $R_f = 0.3$  (Petroleum ether/EtOAc = 1/1). White solid (1.229 g, 75% yield), m.p. 203-205 °C.  $^1H$  NMR (400 MHz,  $CDCl_3$ )  $\delta$ : 8.43 (s, 1H), 7.89 – 7.86 (m, 1H), 7.79 – 7.76 (m, 2H), 7.50 – 7.47 (m, 1H), 7.41 (t,  $J = 7.8$  Hz, 1H), 7.34 – 7.28 (m, 3H), 3.91 (s, 3H), 2.03 (s, 6H);  $^{13}C\{^1H\}$  NMR (100 MHz,  $CDCl_3$ )  $\delta$ : 164.7, 157.0, 140.7, 137.4, 136.9, 134.8, 131.5, 129.9, 127.4, 125.1, 122.9, 122.3, 119.7, 109.2, 54.4, 31.9, 25.7. HRMS (positive ESI):  $[M+H]^+$  calcd for  $C_{18}H_{19}ClN_3O^+$ : 328.1211, found 328.1210.

**3-Bromo-*N*-(2-(1-methyl-1*H*-benzo[*d*]imidazol-2-yl)propan-2-yl)benzamide (1o).**  $R_f = 0.4$  (Petroleum ether/EtOAc = 1/1). White solid (1.303 g, 70% yield), m.p. 214-216 °C.  $^1H$  NMR (400 MHz,  $CDCl_3$ )  $\delta$ : 8.41 (s, 1H), 8.03 (t,  $J = 1.7$  Hz, 1H), 7.82 – 7.75 (m, 2H), 7.65 – 7.62 (m, 1H), 7.35 – 7.26 (m, 4H), 3.90 (s, 3H), 2.02 (s, 6H);  $^{13}C\{^1H\}$  NMR (100 MHz,

CDCl<sub>3</sub>)  $\delta$ : 164.6, 157.0, 140.7, 137.3, 137.1, 134.4, 130.3, 130.1, 125.6, 122.9, 122.8, 122.3, 119.6, 109.2, 54.4, 31.9, 25.8. HRMS (positive ESI): [M+H]<sup>+</sup> calcd for C<sub>18</sub>H<sub>19</sub>BrN<sub>3</sub>O<sup>+</sup>: 372.0706, found 372.0709.

***N*-(2-(1-methyl-1*H*-benzo[*d*]imidazol-2-yl)propan-2-yl)-3-(trifluoromethyl)benzamide (1p).** R<sub>f</sub> = 0.4 (Petroleum ether/EtOAc = 1/1). White solid (1.445 g, 80% yield), m.p. 191-193 °C. <sup>1</sup>H NMR (400 MHz, CDCl<sub>3</sub>)  $\delta$ : 8.68 (s, 1H), 8.20 (s, 1H), 8.09 (d, *J* = 7.8 Hz, 1H), 7.80 – 7.75 (m, 2H), 7.62 (t, *J* = 7.8 Hz, 1H), 7.37 – 7.27 (m, 3H), 3.94 (s, 3H), 2.07 (s, 6H); <sup>13</sup>C{<sup>1</sup>H} NMR (100 MHz, CDCl<sub>3</sub>)  $\delta$ : 164.6, 157.1, 140.4, 137.3, 135.9, 131.2 (q, *J*<sub>C-F</sub> = 32.7 Hz), 130.2, 129.2, 128.0 (q, *J*<sub>C-F</sub> = 3.5 Hz), 124.3 (q, *J*<sub>C-F</sub> = 3.8 Hz), 123.8 (q, *J*<sub>C-F</sub> = 270.9 Hz), 123.0, 122.5, 119.5, 109.3, 54.5, 32.0, 25.7; <sup>19</sup>F NMR (376 MHz, CDCl<sub>3</sub>)  $\delta$ : -62.7. HRMS (positive ESI): [M+H]<sup>+</sup> calcd for C<sub>19</sub>H<sub>19</sub>F<sub>3</sub>N<sub>3</sub>O<sup>+</sup>: 362.1475, found 362.1473.

**3-Methyl-*N*-(2-(1-methyl-1*H*-benzo[*d*]imidazol-2-yl)propan-2-yl)benzamide (1r).** R<sub>f</sub> = 0.4 (Petroleum ether/EtOAc = 1/1). White solid (0.922 g, 60% yield), m.p. 210-212 °C. <sup>1</sup>H NMR (400 MHz, CDCl<sub>3</sub>)  $\delta$ : 8.01 (s, 1H), 7.81 – 7.75 (m, 1H), 7.69 (s, 1H), 7.67 – 7.63 (m, 1H), 7.37 – 7.25 (m, 5H), 3.89 (s, 3H), 2.41 (s, 3H), 2.02 (s, 6H); <sup>13</sup>C{<sup>1</sup>H} NMR (100 MHz, CDCl<sub>3</sub>)  $\delta$ : 166.4, 157.2, 141.0, 138.4, 137.3, 134.8, 132.3, 128.5, 127.8, 124.0, 122.6, 122.1, 119.6, 109.2, 54.1, 31.8, 26.3, 21.4. HRMS (positive ESI): [M+H]<sup>+</sup> calcd for C<sub>19</sub>H<sub>22</sub>N<sub>3</sub>O<sup>+</sup>: 308.1757, found 308.1758.

**2-Fluoro-*N*-(2-(1-methyl-1*H*-benzo[*d*]imidazol-2-yl)propan-2-yl)benzamide (1t).** R<sub>f</sub> = 0.5 (Petroleum ether/EtOAc = 1/1). White solid (0.856 g, 55% yield), m.p. 146-147 °C. <sup>1</sup>H NMR (600 MHz, CDCl<sub>3</sub>)  $\delta$ : 7.92 (s, 1H), 7.83 (d, *J* = 11.8 Hz, 1H), 7.79 – 7.74 (m, 1H), 7.45 – 7.38 (m, 1H), 7.28 – 7.07 (m, 5H), 3.80 (s, 3H), 1.96 (s, 6H). <sup>13</sup>C{<sup>1</sup>H} NMR (150 MHz, CDCl<sub>3</sub>)  $\delta$ : 162.1, 160.5 (d, *J*<sub>C-F</sub> = 245.6 Hz), 156.7, 141.4, 137.2, 133.4 (d, *J*<sub>C-F</sub> = 9.4 Hz), 131.7, 124.8, 122.5, 121.9, 121.5 (d, *J*<sub>C-F</sub> = 11.9 Hz), 119.7, 116.1 (d, *J*<sub>C-F</sub> = 24.5 Hz), 109.1, 54.2, 31.6, 27.0. <sup>19</sup>F NMR (565 MHz, CDCl<sub>3</sub>)  $\delta$ : -113.2. HRMS (positive ESI): [M+H]<sup>+</sup> calcd for C<sub>18</sub>H<sub>19</sub>FN<sub>3</sub>O<sup>+</sup>: 312.1507, found 312.1506.

**2-Chloro-*N*-(2-(1-methyl-1*H*-benzo[*d*]imidazol-2-yl)propan-2-yl)benzamide (1u).** R<sub>f</sub> = 0.3 (Petroleum ether/EtOAc = 1/1). White solid (0.951 g, 58% yield), m.p. 191-192 °C. <sup>1</sup>H NMR (600 MHz, CDCl<sub>3</sub>)  $\delta$ : 7.80 (s, 1H), 7.73 (d, *J* = 7.7 Hz, 1H), 7.62 (d, *J* = 7.6 Hz, 1H), 7.41 (d, *J* = 7.9 Hz, 1H), 7.36 (t, *J* = 7.38, 1H), 7.33-7.22 (m, 4H), 3.91 (s, 3H), 2.03 (s, 6H).

$^{13}\text{C}\{^1\text{H}\}$  NMR (150 MHz,  $\text{CDCl}_3$ )  $\delta$ : 165.4, 156.6, 141.0, 137.3, 135.6, 131.2, 130.7, 130.3, 130.0, 127.1, 122.7, 122.2, 119.7, 109.1, 54.7, 31.8, 26.3. HRMS (positive ESI):  $[\text{M}+\text{H}]^+$  calcd for  $\text{C}_{18}\text{H}_{19}\text{ClN}_3\text{O}^+$ : 328.1211, found 328.1212.

**2-Bromo-*N*-(2-(1-methyl-1*H*-benzo[*d*]imidazol-2-yl)propan-2-yl)benzamide (1v).**  $R_f = 0.3$  (Petroleum ether/EtOAc = 1/1). White solid (1.229 g, 66% yield), m.p. 192-193 °C.  $^1\text{H}$  NMR (600 MHz,  $\text{CDCl}_3$ )  $\delta$ : 7.77 (s, 1H), 7.72 (d,  $J = 7.8$  Hz, 1H), 7.60 (d,  $J = 8.0$  Hz, 1H), 7.55 (d,  $J = 7.5$  Hz, 1H), 7.38 – 7.34 (m, 1H), 7.33 – 7.23 (m, 4H), 3.93 (s, 3H), 2.05 (s, 6H).  $^{13}\text{C}\{^1\text{H}\}$  NMR (150 MHz,  $\text{CDCl}_3$ )  $\delta$ : 166.5, 156.7, 140.9, 138.3, 137.4, 133.4, 131.2, 129.5, 127.6, 122.8, 122.2, 119.7, 119.4, 109.2, 54.8, 31.9, 26.0. HRMS (positive ESI):  $[\text{M}+\text{H}]^+$  calcd for  $\text{C}_{18}\text{H}_{19}\text{BrN}_3\text{O}^+$ : 372.0706, found 372.0707.

**3,4-Dimethoxy-*N*-(2-(1-methyl-1*H*-benzo[*d*]imidazol-2-yl)propan-2-yl)benzamide (1w).**  $R_f = 0.2$  (Petroleum ether/EtOAc = 1/1). White solid (0.813 g, 46% yield), m.p. 189-191 °C.  $^1\text{H}$  NMR (400 MHz,  $\text{CDCl}_3$ )  $\delta$ : 8.05 (s, 1H), 7.80 – 7.74 (m, 1H), 7.51 (d,  $J = 2.0$  Hz, 1H), 7.45 (dd,  $J = 2.0, 8.3$  Hz, 1H), 7.34 – 7.27 (m, 3H), 6.92 (d,  $J = 8.4$  Hz, 1H), 3.97 – 3.92 (m, 6H), 3.91 (s, 3H), 2.03 (s, 6H);  $^{13}\text{C}\{^1\text{H}\}$  NMR (100 MHz,  $\text{CDCl}_3$ )  $\delta$ : 165.6, 157.3, 151.8, 149.1, 140.9, 137.3, 127.6, 122.7, 122.2, 119.6, 119.3, 110.7, 110.3, 109.2, 56.1, 56.0, 54.2, 31.9, 26.2. HRMS (positive ESI):  $[\text{M}+\text{H}]^+$  calcd for  $\text{C}_{20}\text{H}_{24}\text{N}_3\text{O}_3^+$ : 354.1812, found 354.1816.

**3,5-Dimethoxy-*N*-(2-(1-methyl-1*H*-benzo[*d*]imidazol-2-yl)propan-2-yl)benzamide (1x).**  $R_f = 0.2$  (Petroleum ether/EtOAc = 1/1). White solid (0.990 g, 56% yield), m.p. 190-191 °C.  $^1\text{H}$  NMR (400 MHz,  $\text{CDCl}_3$ )  $\delta$ : 7.95 (s, 1H), 7.80 – 7.74 (m, 1H), 7.33 – 7.25 (m, 3H), 7.01 (d,  $J = 2.3$  Hz, 2H), 6.59 (t,  $J = 2.2$  Hz, 1H), 3.90 (s, 3H), 3.84 (s, 6H), 2.02 (s, 6H),  $^{13}\text{C}\{^1\text{H}\}$  NMR (100 MHz,  $\text{CDCl}_3$ )  $\delta$ : 165.9, 160.9, 157.0, 140.8, 137.2, 137.0, 122.8, 122.3, 119.6, 109.2, 105.0, 103.7, 55.6, 54.2, 31.8, 26.3. HRMS (positive ESI):  $[\text{M}+\text{H}]^+$  calcd for  $\text{C}_{20}\text{H}_{24}\text{N}_3\text{O}_3^+$ : 354.1812, found 354.1815.

**3,5-Dimethyl-*N*-(2-(1-methyl-1*H*-benzo[*d*]imidazol-2-yl)propan-2-yl)benzamide (1y).**  $R_f = 0.3$  (Petroleum ether/EtOAc = 1/1). White solid (0.964 g, 60% yield), m.p. 215-217 °C.  $^1\text{H}$  NMR (400 MHz,  $\text{CDCl}_3$ )  $\delta$ : 7.82 (s, 1H), 7.81 – 7.76 (m, 1H), 7.46 (s, 2H), 7.32 – 7.25 (m, 3H), 7.14 (s, 1H), 3.89 (s, 3H), 2.37 (s, 6H), 2.01 (s, 6H);  $^{13}\text{C}\{^1\text{H}\}$  NMR (100 MHz,  $\text{CDCl}_3$ )  $\delta$ : 166.5, 157.2, 141.0, 138.3, 137.3, 134.8, 133.1, 124.7, 122.6, 122.1, 119.7, 109.1,

54.1, 31.8, 26.4, 21.3. HRMS (positive ESI):  $[M+H]^+$  calcd for  $C_{20}H_{24}N_3O^+$ : 322.1914, found 322.1917.

**3,4-Dichloro-*N*-(2-(1-methyl-1*H*-benzo[*d*]imidazol-2-yl)propan-2-yl)benzamide (1z).**

$R_f = 0.4$  (Petroleum ether/EtOAc = 1/1). White solid (0.978 g, 54% yield), m.p. 217-218 °C.  $^1H$  NMR (400 MHz,  $CDCl_3$ )  $\delta$ : 8.66 (s, 1H), 7.99 (d,  $J = 2.1$  Hz, 1H), 7.79 – 7.75 (m, 1H), 7.72 (dd,  $J = 2.1, 8.3$  Hz, 1H), 7.51 (d,  $J = 8.4$  Hz, 1H), 7.38 – 7.28 (m, 3H), 3.95 (s, 3H), 2.05 (s, 6H);  $^{13}C\{^1H\}$  NMR (100 MHz,  $CDCl_3$ )  $\delta$ : 163.7, 157.0, 140.5, 137.4, 135.8, 135.1, 133.1, 130.6, 129.4, 126.1, 123.0, 122.5, 119.6, 109.3, 54.5, 32.0, 25.4. HRMS (positive ESI):  $[M+H]^+$  calcd for  $C_{18}H_{18}Cl_2N_3O^+$ : 362.0821, found 362.0825.

***N*-(2-(1-methyl-1*H*-benzo[*d*]imidazol-2-yl)propan-2-yl)-2-naphthamide (1ab).**

$R_f = 0.3$  (Petroleum ether/EtOAc = 1/1). White solid (0.944 g, 55% yield), m.p. 218-220 °C.  $^1H$  NMR (400 MHz,  $CDCl_3$ )  $\delta$ : 8.41 (s, 1H), 8.31 (s, 1H), 8.00 – 7.85 (m, 4H), 7.84 – 7.78 (m, 1H), 7.60 – 7.52 (m, 2H), 7.37 – 7.27 (m, 3H), 3.93 (s, 3H), 2.08 (s, 6H);  $^{13}C\{^1H\}$  NMR (100 MHz,  $CDCl_3$ )  $\delta$ : 166.1, 157.3, 140.9, 137.3, 134.8, 132.7, 132.2, 129.0, 128.5, 127.8, 127.6, 127.5, 126.7, 123.6, 122.8, 122.3, 119.7, 109.2, 54.4, 31.9, 26.1. HRMS (positive ESI):  $[M+H]^+$  calcd for  $C_{22}H_{22}N_3O^+$ : 344.1757, found 344.1759.

## Optimization of reaction conditions

**Table S1. Optimization of base<sup>a</sup>**

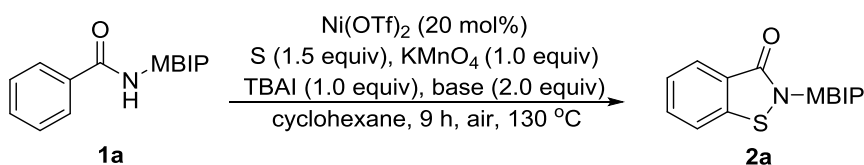

| Entry          | Base                | Yield <sup>b</sup> (%) |
|----------------|---------------------|------------------------|
| 1              | none                | 11                     |
| 2              | KOH                 | 0                      |
| 3              | $Na_2CO_3$          | 0                      |
| 4              | $NaHCO_3$           | trace                  |
| 5              | PivOK               | 4                      |
| 6              | <i>t</i> -BuOK      | 0                      |
| 7              | $PivONa \cdot H_2O$ | 96                     |
| 8 <sup>c</sup> | $PivONa \cdot H_2O$ | 88                     |

<sup>a</sup>Reaction conditions: **1a** (0.10 mmol), S (0.15 mmol), Ni(OTf)<sub>2</sub> (20 mol%), cyclohexane (1.0 mL), KMnO<sub>4</sub> (1.0 equiv), base (2.0 equiv), TBAI (1.0 equiv), 130 °C, under air, 9 h. <sup>b</sup>Isolated yields. <sup>c</sup>Base (1.0 equiv). TBAI = tetrabutylammonium iodide.

**Table S2. Optimization of additive<sup>a</sup>**

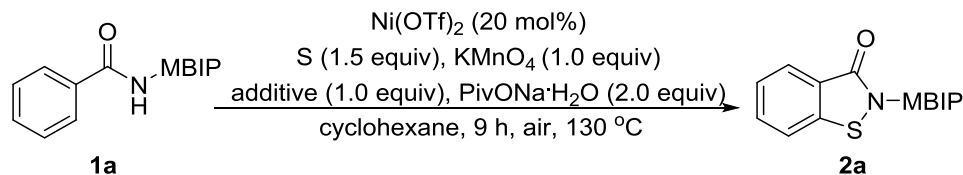

| Entry | Additive            | Yield <sup>b</sup> (%) |
|-------|---------------------|------------------------|
| 1     | TBAB                | 75                     |
| 2     | TBAHSO <sub>4</sub> | 31                     |
| 3     | THAB                | 0                      |
| 4     | TBAI                | 96                     |

<sup>a</sup>Reaction conditions: **1a** (0.10 mmol), S (0.15 mmol), Ni(OTf)<sub>2</sub> (20 mol%), cyclohexane (1.0 mL), KMnO<sub>4</sub> (1.0 equiv), PivONa·H<sub>2</sub>O (2.0 equiv), additive (1.0 equiv), 130 °C, under air, 9 h. <sup>b</sup>Isolated yields. <sup>c</sup>Base (1.0 equiv). TBAB = tetrabutylammonium bromide, TBAHSO<sub>4</sub> = tetrabutylammonium hydrogen sulfate, THAB = tetrahexylammonium benzoate.

**Table S3. Optimization of catalyst loading, temperature and reaction time<sup>a</sup>**

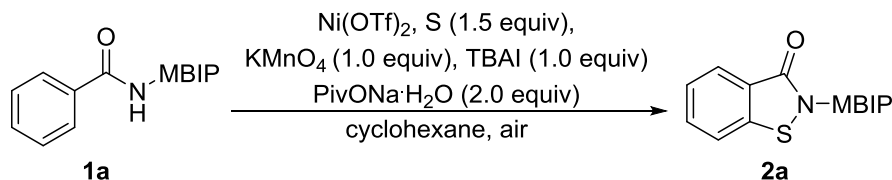

| Entry | Ni(OTf) <sub>2</sub> (mol%) | Temp (°C) | Time (h) | Yield <sup>b</sup> (%) |
|-------|-----------------------------|-----------|----------|------------------------|
| 1     | 20                          | 130       | 9        | 96                     |
| 2     | 10                          | 110       | 9        | 20                     |
| 3     | 10                          | 120       | 9        | 45                     |
| 4     | 10                          | 130       | 9        | 65                     |
| 5     | 10                          | 140       | 9        | 98                     |
| 6     | 10                          | 140       | 6        | 78                     |

<sup>a</sup>Reaction conditions: **1a** (0.10 mmol), S (0.15 mmol), Ni(OTf)<sub>2</sub>, KMnO<sub>4</sub> (1.0 equiv), PivONa·H<sub>2</sub>O (2.0 equiv), TBAI (1.0 equiv), cyclohexane (1.0 mL), under air. <sup>b</sup>Isolated yields.

### Crystal reports for **2a**

Crystals of **2a** (CCDC 1869264) were obtained by recrystallization from EtOAc/ Petroleum ether at ambient temperature. The data were collected on an Oxford Diffraction Gemini E

diffractometer with graphite-monochromated Cu K $\alpha$  radiation ( $\lambda = 1.54184 \text{ \AA}$ ) for compound **2a**. The structure was solved by direct methods using the SHELXS-97 program, and all non-hydrogen atoms were refined anisotropically on  $F^2$  by the full-matrix least-squares technique, which used the SHELXL-97 crystallographic software package. The hydrogen atoms were included but not refined.

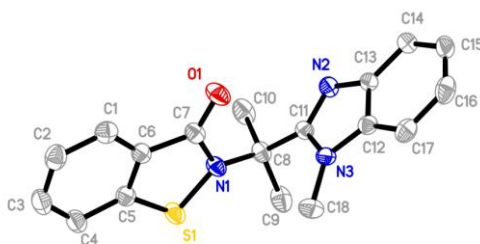

**Figure S1.** Molecular structure of **2a** (showing one of four independent molecules in the unit cell). Hydrogen atoms are omitted for clarity.

**Table S4.** Summary of crystal structure determination for **2a**

|                                    | <b>2a</b>                                         |
|------------------------------------|---------------------------------------------------|
| Empirical formula                  | C <sub>18</sub> H <sub>17</sub> N <sub>3</sub> OS |
| Formula weight                     | 323.40                                            |
| Temperature/K                      | 293(2)                                            |
| Crystal system                     | triclinic                                         |
| Space group                        | P-1                                               |
| a/ $\text{\AA}$                    | 12.3938(4)                                        |
| b/ $\text{\AA}$                    | 14.5761(8)                                        |
| c/ $\text{\AA}$                    | 18.8153(11)                                       |
| $\alpha/^\circ$                    | 79.216(5)                                         |
| $\beta/^\circ$                     | 89.365(4)                                         |
| $\gamma/^\circ$                    | 75.485(4)                                         |
| Volume/ $\text{\AA}^3$             | 3230.2(3)                                         |
| Z                                  | 8                                                 |
| $\rho_{\text{calc}}/\text{g/cm}^3$ | 1.330                                             |
| $\mu/\text{mm}^{-1}$               | 1.838                                             |
| F(000)                             | 1360.0                                            |
| Crystal size/ $\text{mm}^3$        | 0.19 $\times$ 0.16 $\times$ 0.13                  |
| Radiation                          | CuK $\alpha$ ( $\lambda = 1.54184$ )              |



|                                                  |                                                                       |
|--------------------------------------------------|-----------------------------------------------------------------------|
| 2 $\Theta$ range for data collection/ $^{\circ}$ | 7.21 to 134.14                                                        |
| Index ranges                                     | -14 $\leq$ h $\leq$ 8, -17 $\leq$ k $\leq$ 16, -22 $\leq$ l $\leq$ 22 |
| Reflections collected                            | 24480                                                                 |
| Independent reflections                          | 11514 [R <sub>int</sub> = 0.0406, R <sub>sigma</sub> = 0.0550]        |
| Data/restraints/parameters                       | 11514/0/841                                                           |
| Goodness-of-fit on F <sup>2</sup>                | 1.096                                                                 |
| Final R indexes [I $\geq$ 2 $\sigma$ (I)]        | R <sub>1</sub> = 0.0787, wR <sub>2</sub> = 0.2182                     |
| Final R indexes [all data]                       | R <sub>1</sub> = 0.0959, wR <sub>2</sub> = 0.2302                     |
| Largest diff. peak/hole / e $\text{\AA}^{-3}$    | 0.48/-0.30                                                            |

**Table S5. Selected bond lengths ( $\text{\AA}$ ) for compound 2a**

|        | Length/ $\text{\AA}$ |        | Length/ $\text{\AA}$ |
|--------|----------------------|--------|----------------------|
| C5-S1  | 1.752(5)             | C11-N2 | 1.314(5)             |
| C6-C7  | 1.471(6)             | C11-N3 | 1.379(5)             |
| C7-N1  | 1.368(6)             | C12-N3 | 1.376(6)             |
| C7-O1  | 1.219(5)             | C13-N2 | 1.380(5)             |
| C8-C11 | 1.514(6)             | C18-N3 | 1.459(6)             |
| C8-N1  | 1.494(6)             | N1-S1  | 1.730(4)             |

**Table S6. Selected angles ( $^{\circ}$ ) for compound 2a**

|            | Angle/ $^{\circ}$ |            | Angle/ $^{\circ}$ |
|------------|-------------------|------------|-------------------|
| C4-C5-S1   | 126.5(4)          | N2-C11-N3  | 112.8(4)          |
| C6-C5-S1   | 111.8(3)          | N3-C11-C8  | 123.3(4)          |
| C1-C6-C7   | 126.2(4)          | N3-C12-C13 | 105.8(4)          |
| C5-C6-C7   | 113.4(4)          | N3-C12-C17 | 132.2(4)          |
| N1-C7-C6   | 108.7(4)          | N2-C13-C12 | 109.7(4)          |
| O1-C7-C6   | 127.4(4)          | N2-C13-C14 | 129.7(4)          |
| O1-C7-N1   | 123.9(4)          | C7-N1-C8   | 123.4(4)          |
| C9-C8-C10  | 110.6(4)          | C7-N1-S1   | 115.6(3)          |
| C11-C8-C9  | 109.0(4)          | C8-N1-S1   | 117.0(3)          |
| C11-C8-C10 | 109.7(4)          | C11-N2-C13 | 105.4(4)          |
| N1-C8-C9   | 110.8(4)          | C11-N3-C18 | 130.1(4)          |
| N1-C8-C10  | 107.9(4)          | C12-N3-C11 | 106.2(3)          |
| N1-C8-C11  | 108.8(3)          | C12-N3-C18 | 123.7(4)          |
| N2-C11-C8  | 123.7(4)          | N1-S1-C5   | 89.9(2)           |

## Kinetic isotope experiments

### Parallel experiments

Table S7. Parallel experiments

| Entry | Time(min) | Yield of <b>2a</b> | Yield of [D <sub>4</sub> ]- <b>2a</b> |
|-------|-----------|--------------------|---------------------------------------|
| 1     | 30        | 10.98%             | 7.33%                                 |
| 2     | 40        | 13.91%             | 10.38%                                |
| 3     | 50        | 16.08%             | 12.21%                                |
| 4     | 60        | 21.95%             | 15.57%                                |

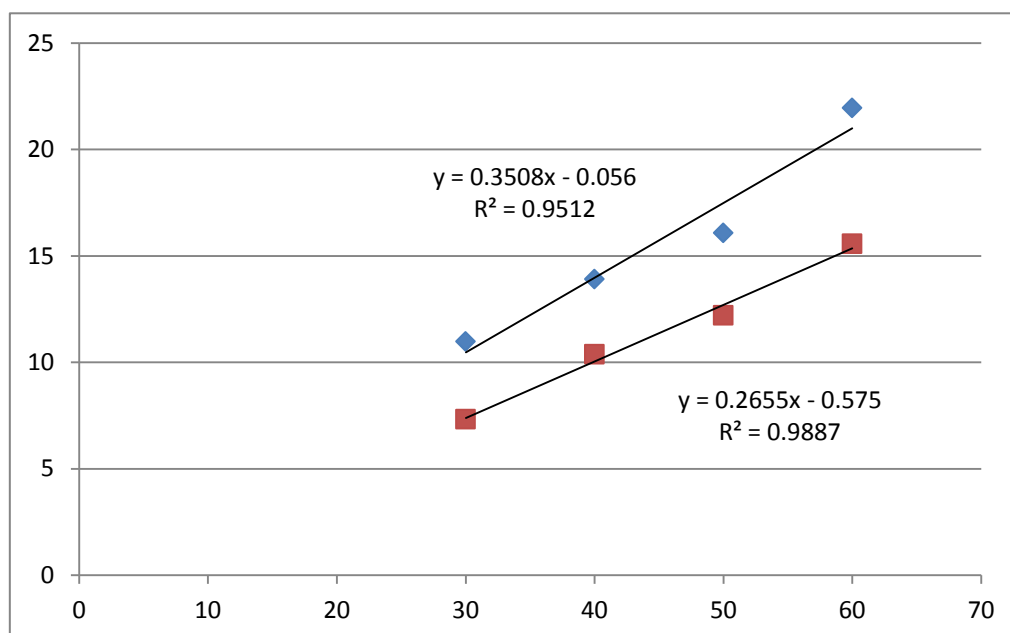

Figure S2. Parallel Experiments

The calculated  $k_H/k_D = 0.3508/0.2655 = 1.3$

### Intermolecular competition experiment

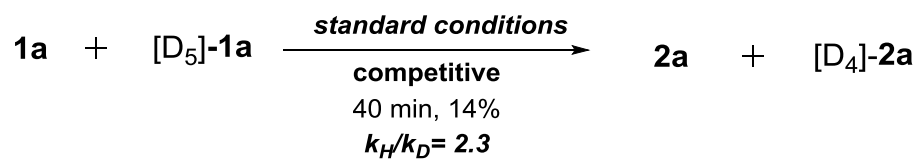

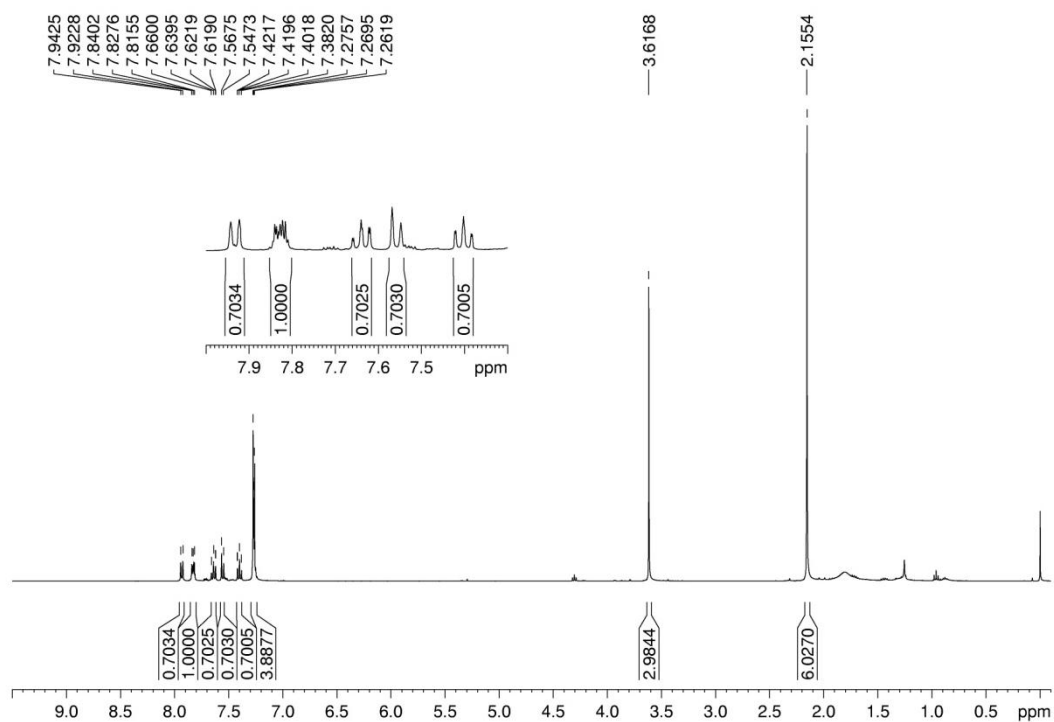

**Figure S3**  $^1\text{H}$  NMR spectrum of product from the intermolecular KIE experiment

## References

- 1 S.-L. Liu, X.-H. Li, T.-H. Shi, G.-C. Yang, H.-L. Wang, J.-F. Gong and M.-P. Song, *Eur. J. Org. Chem.*, 2017, **2017**, 2280.

# Spectra

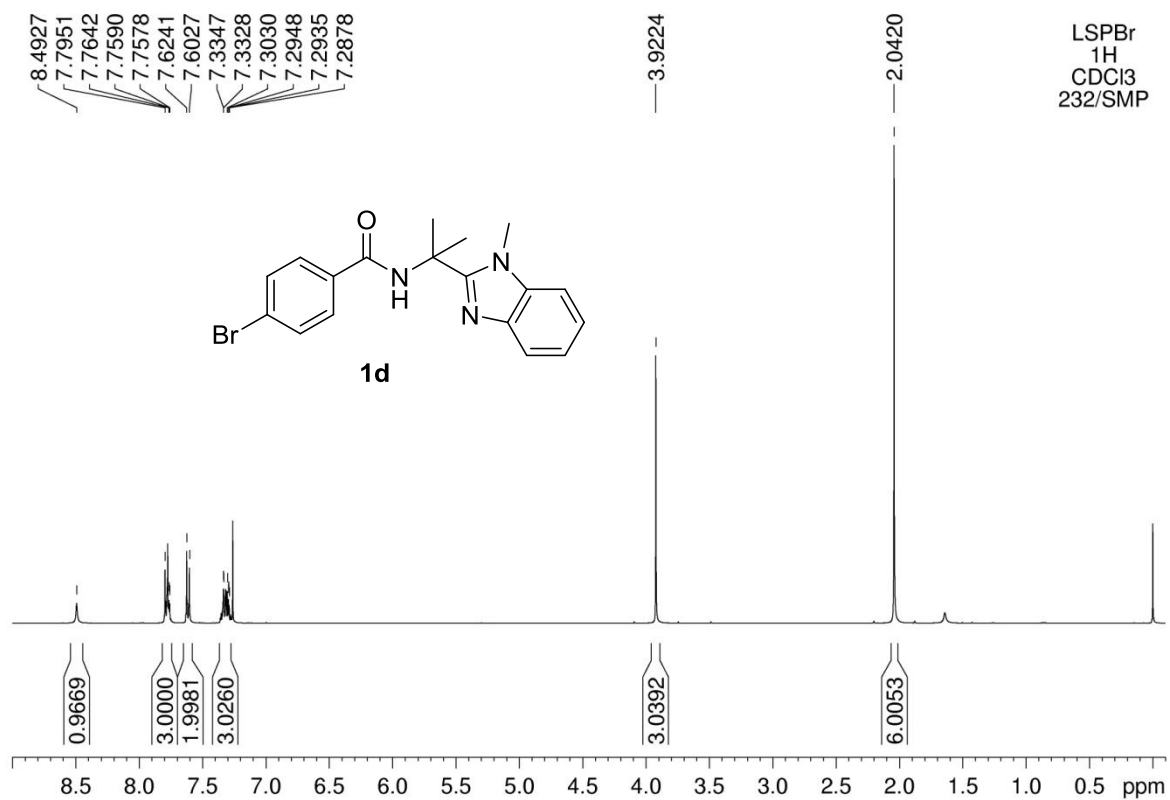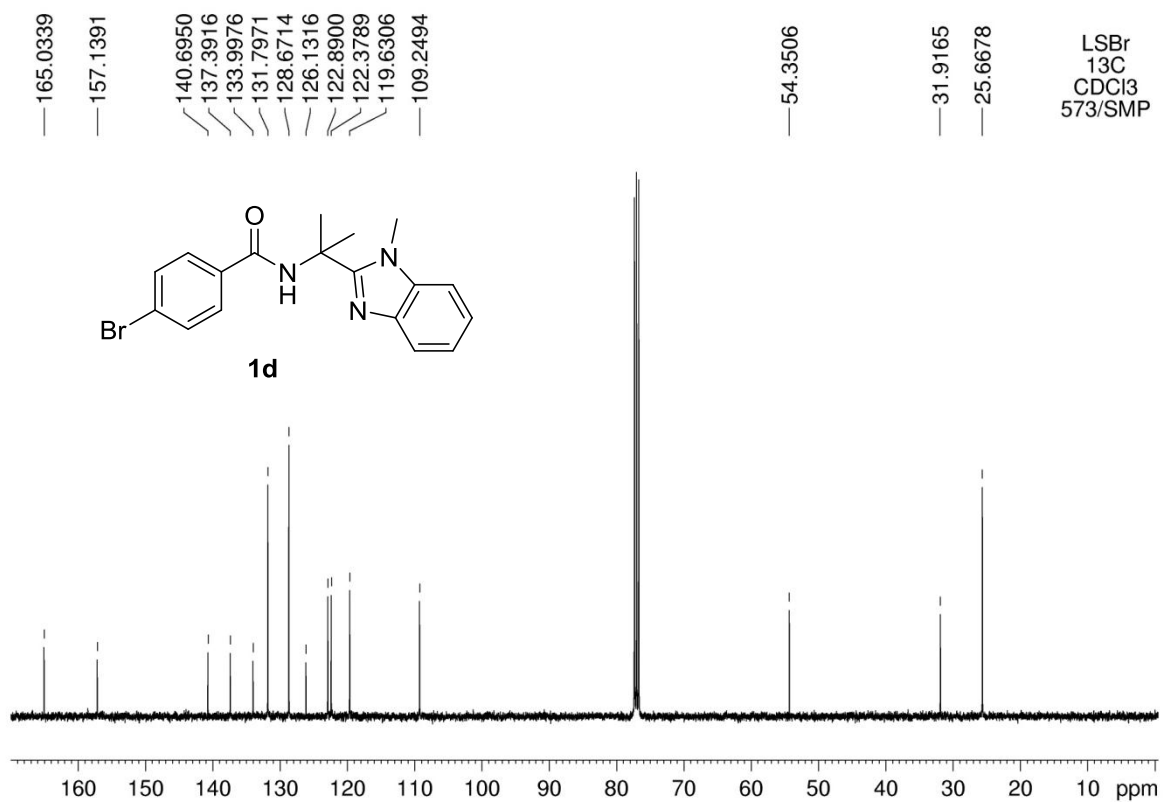

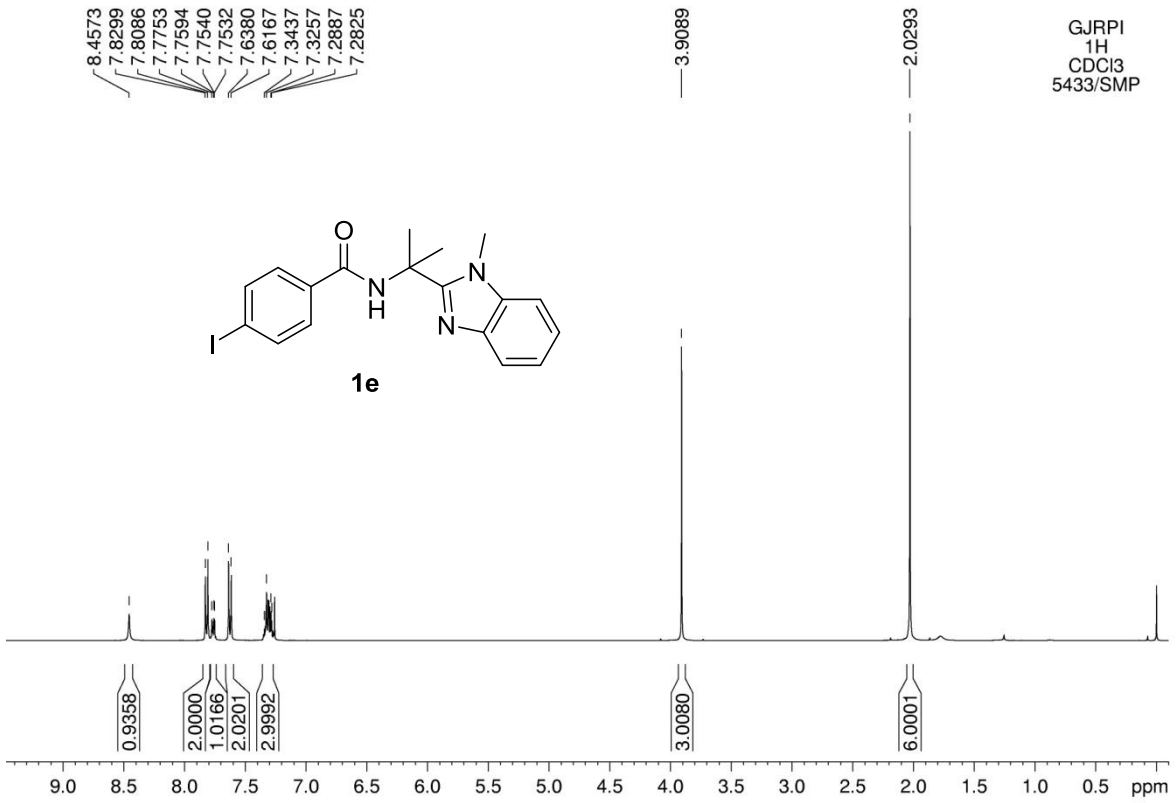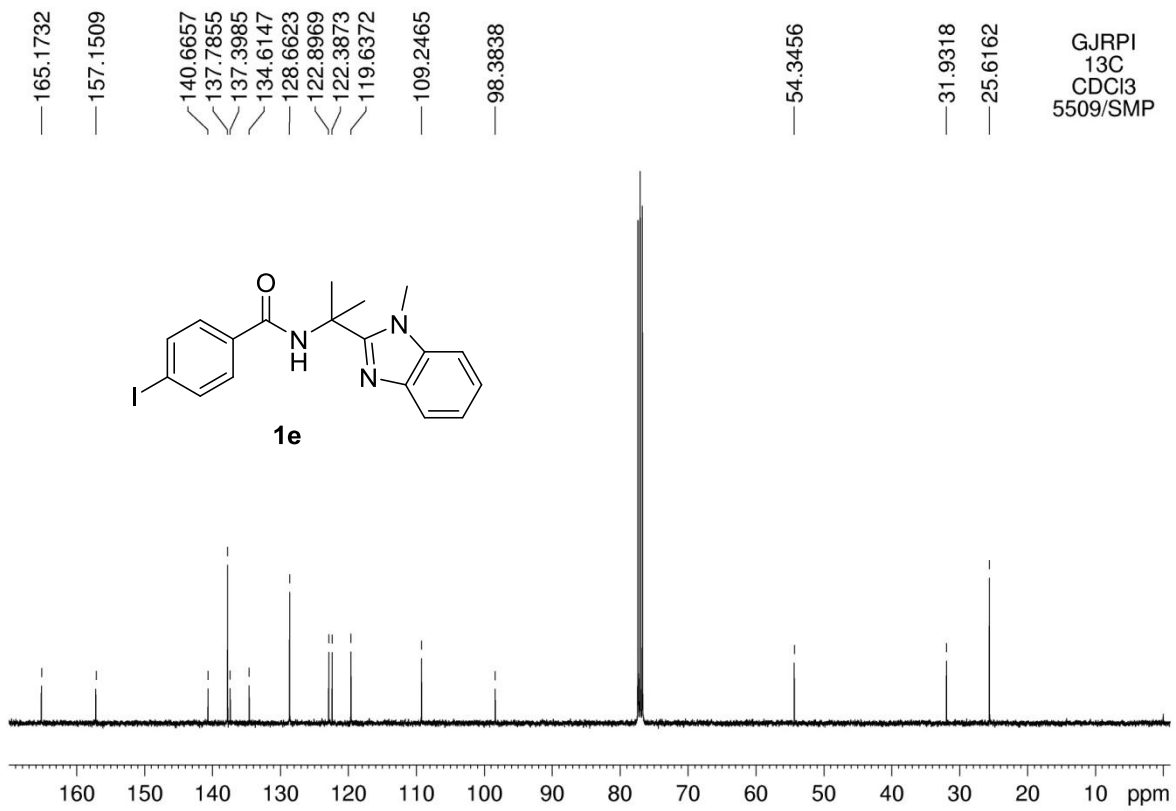

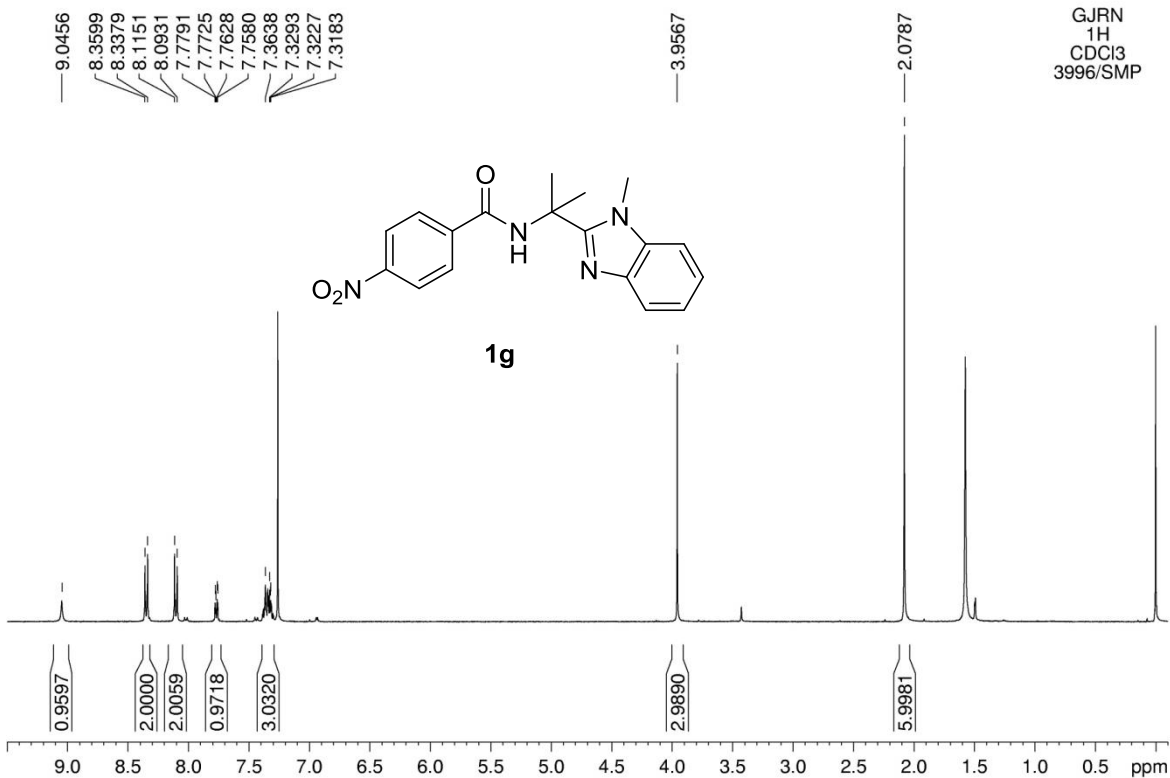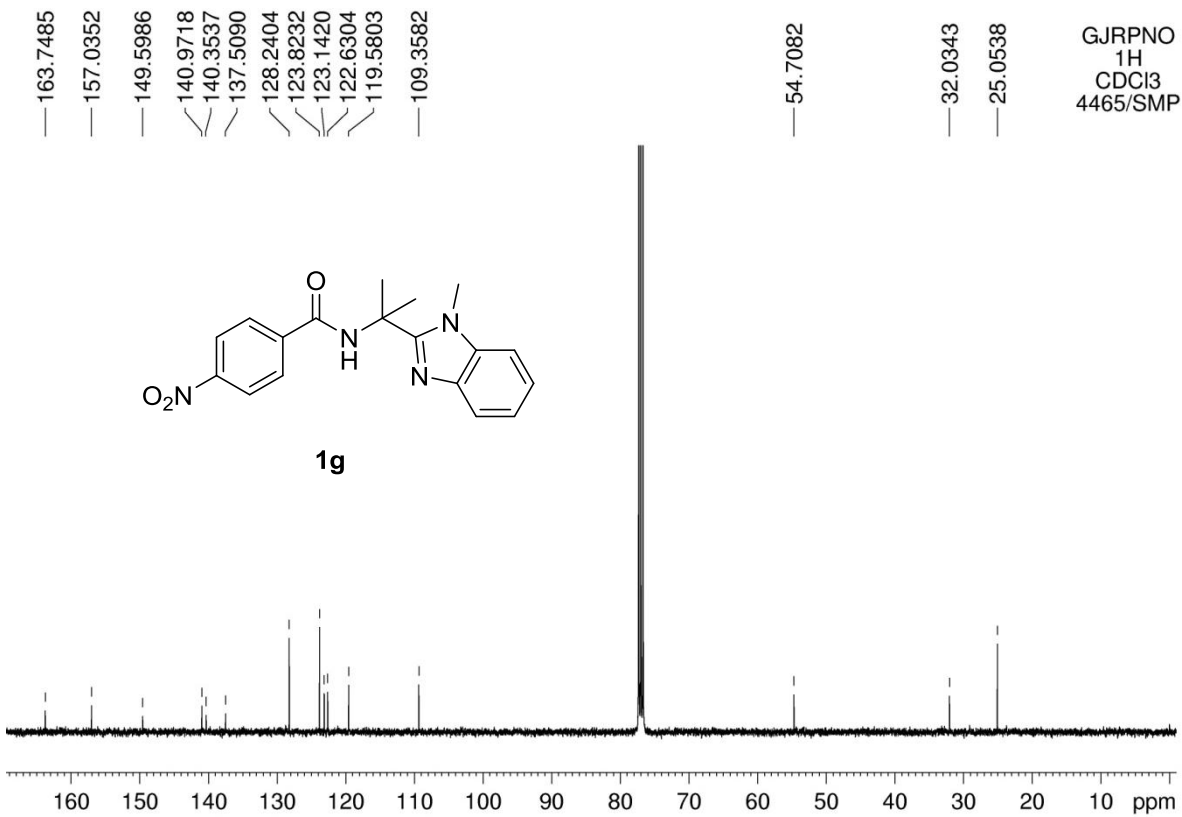

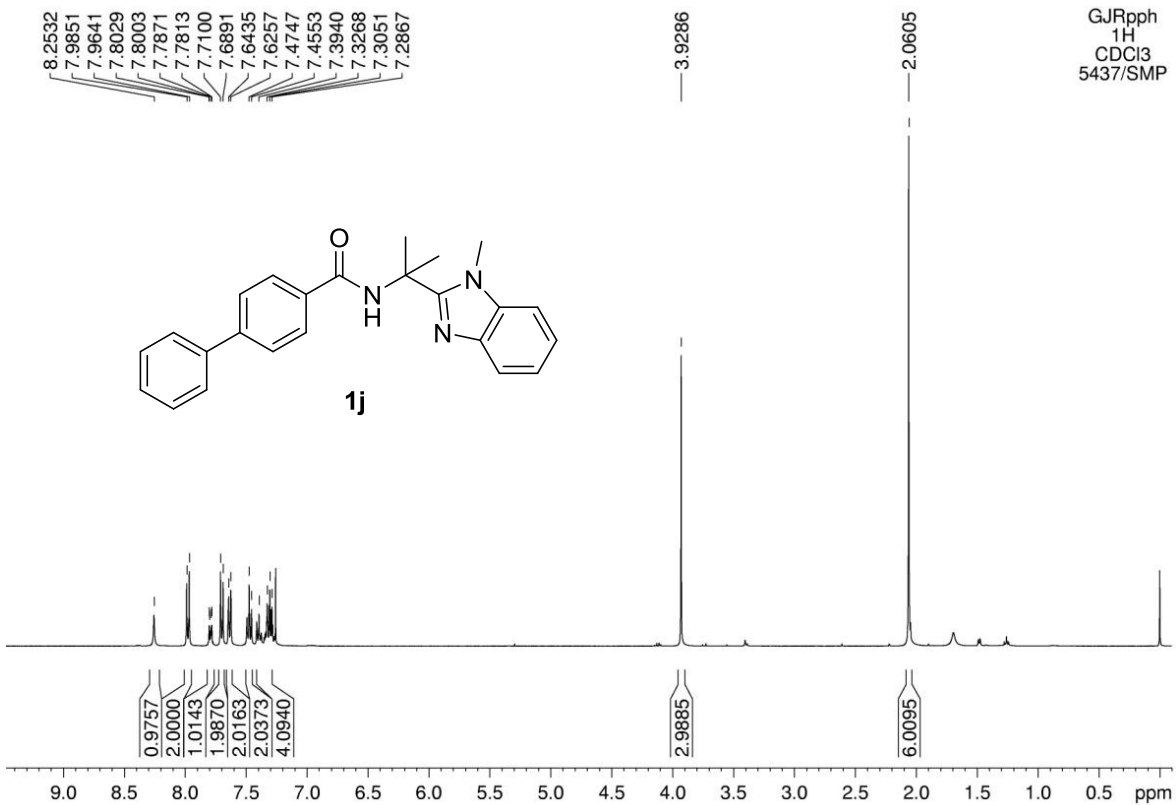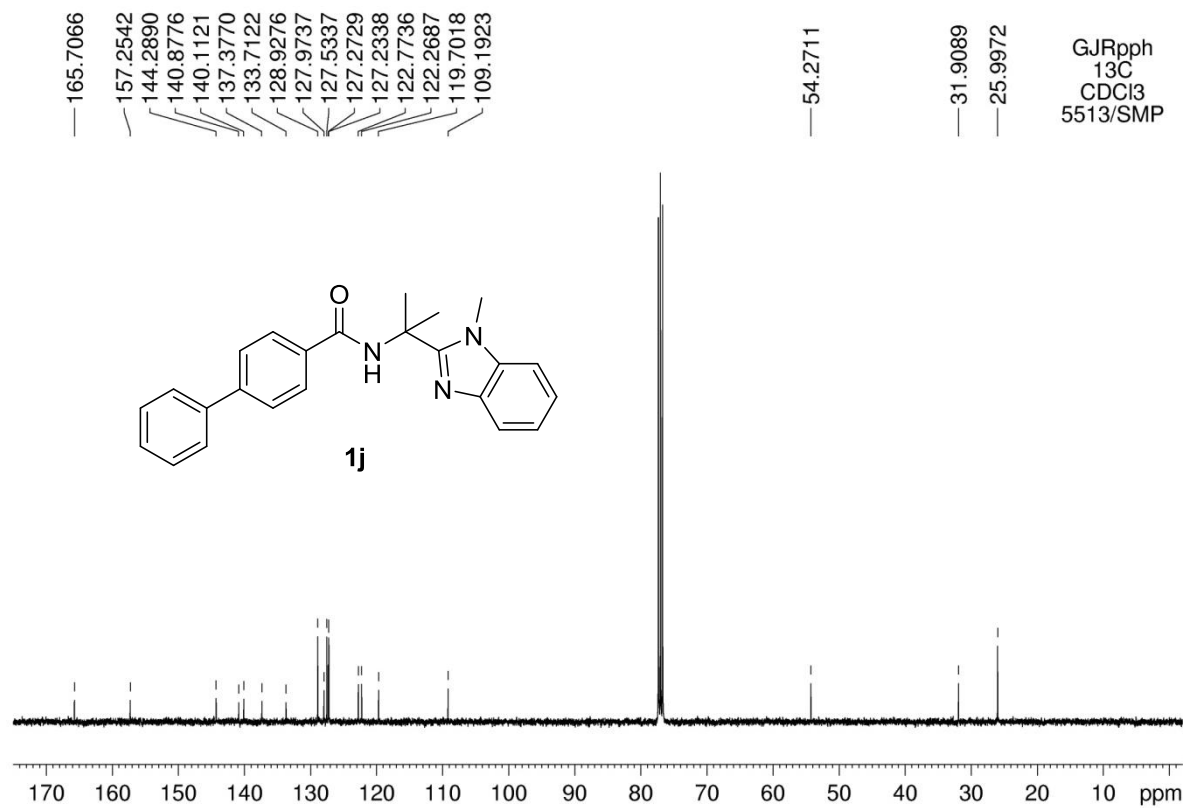

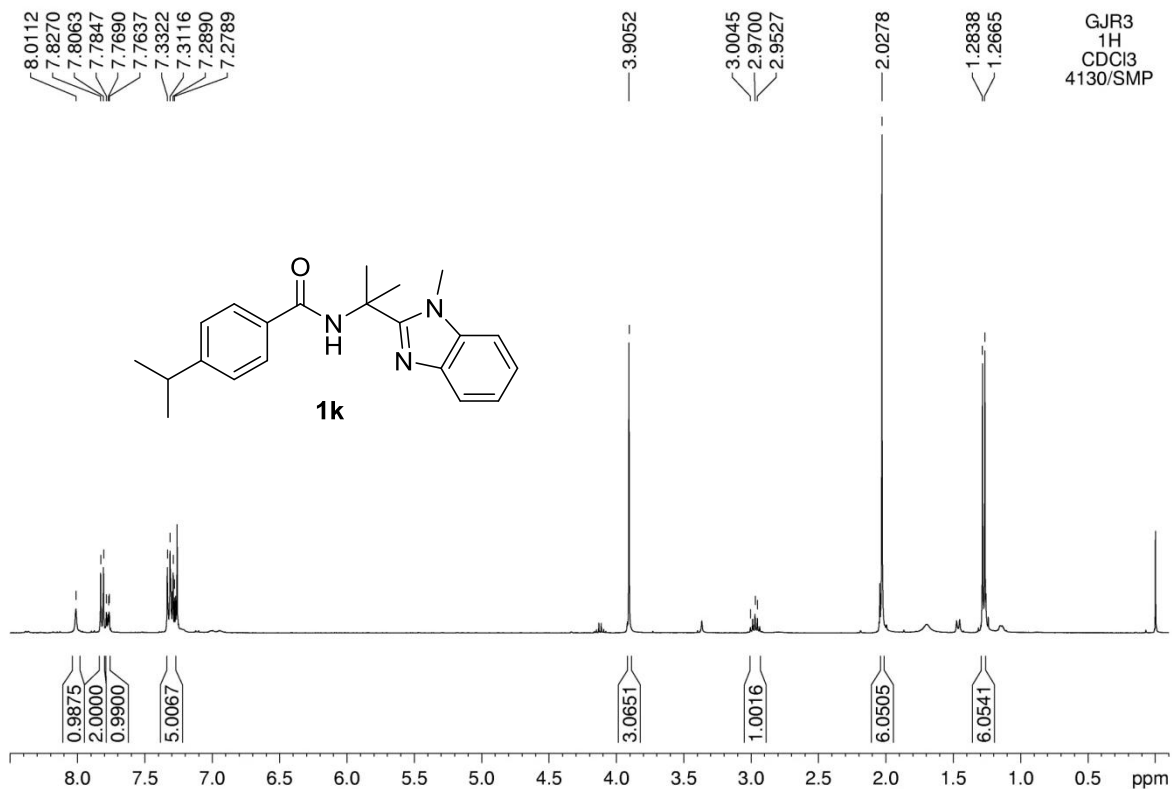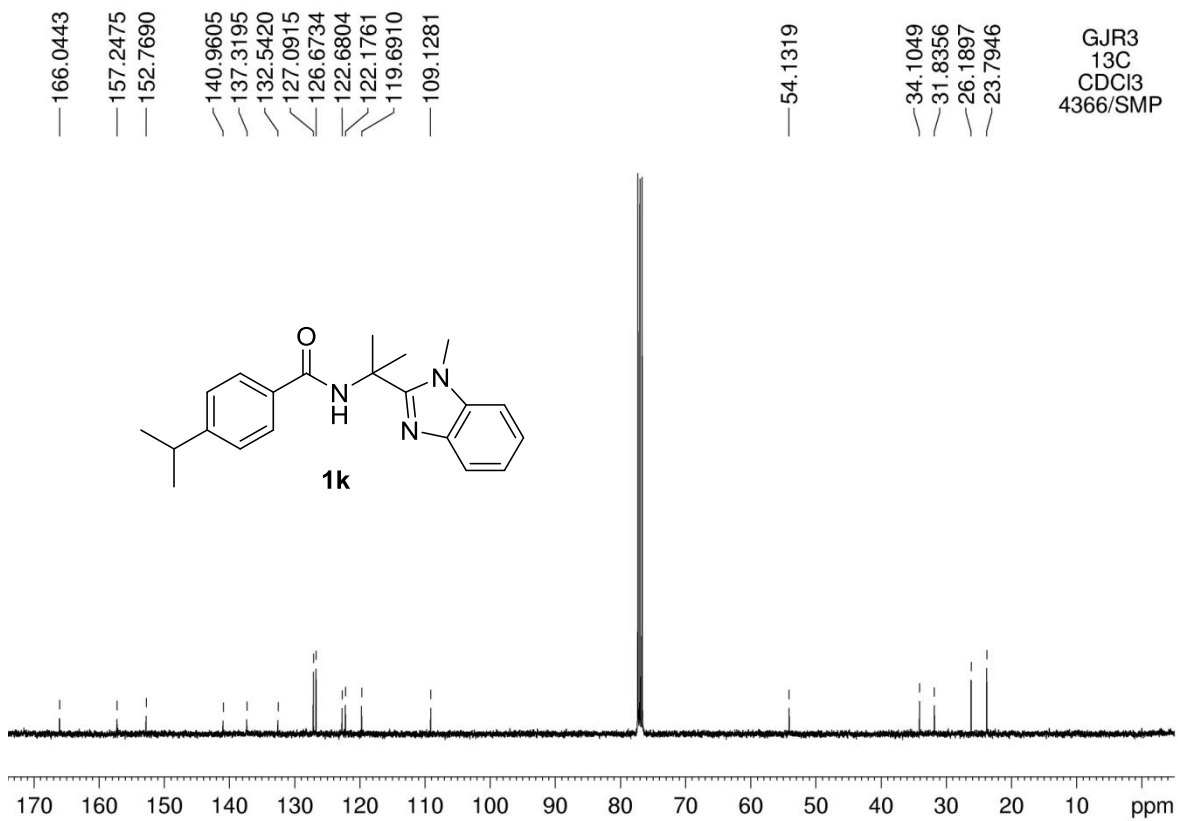



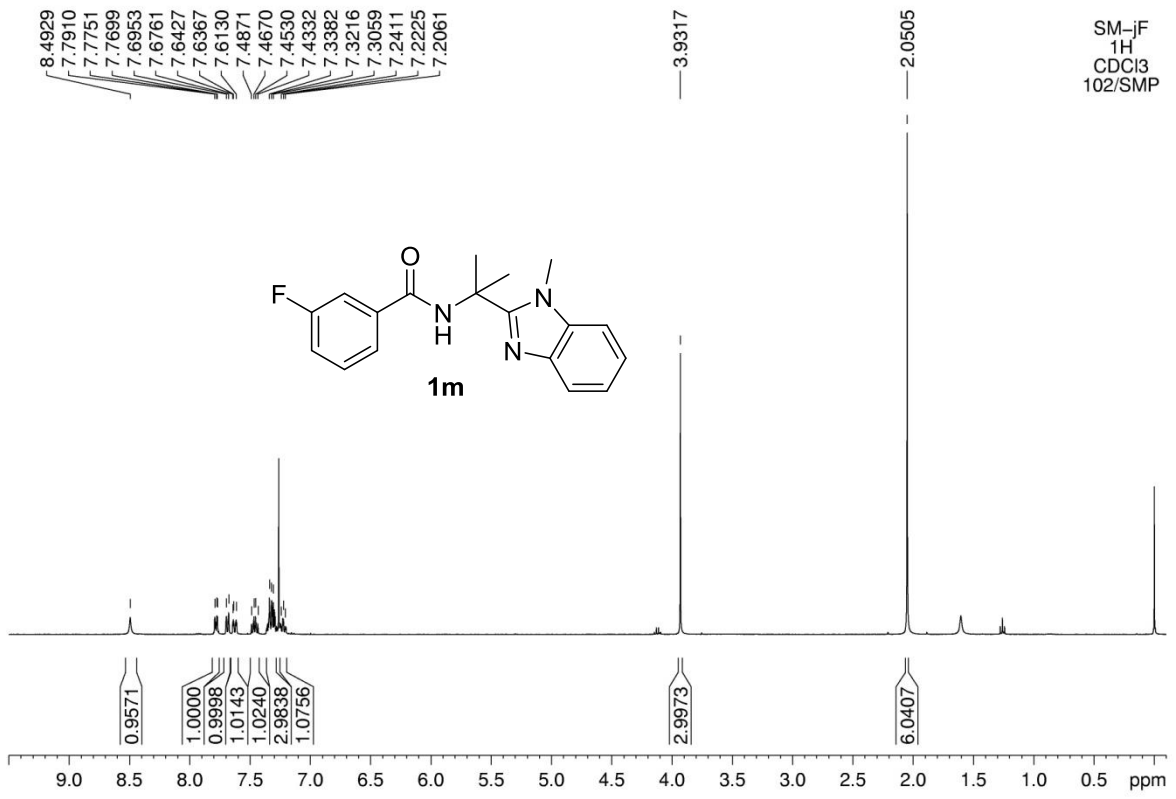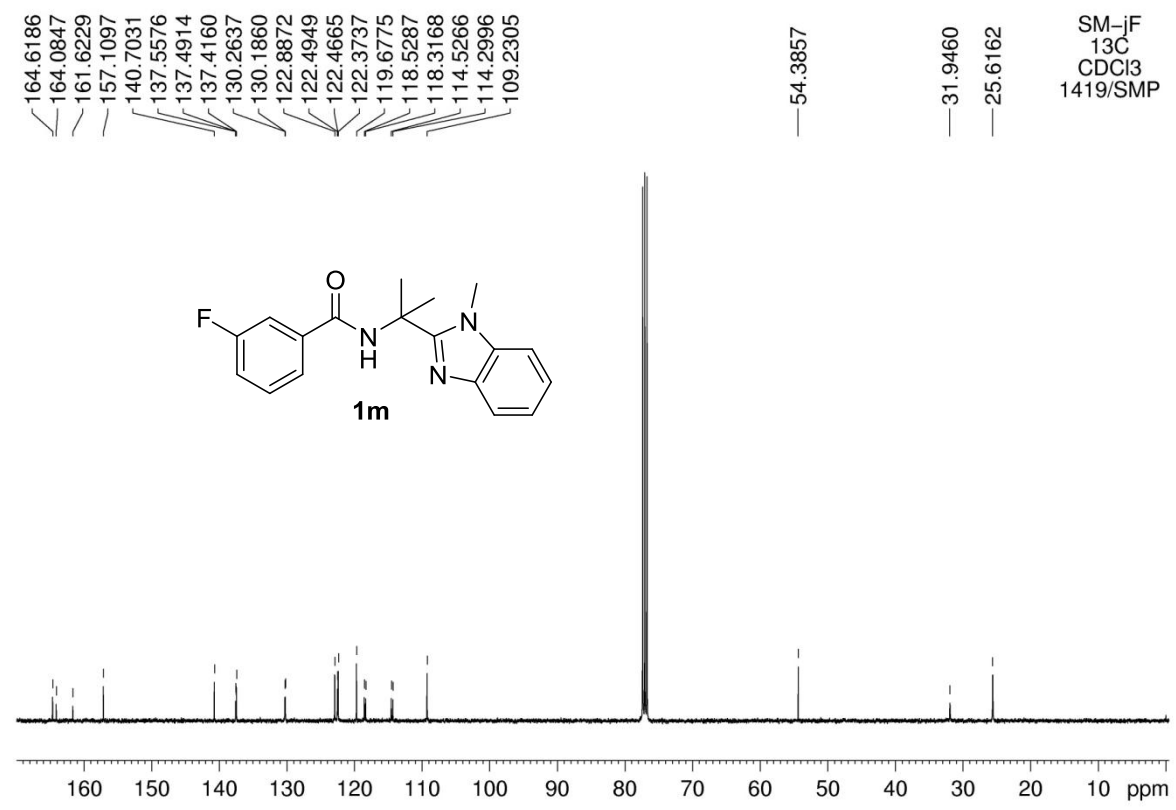

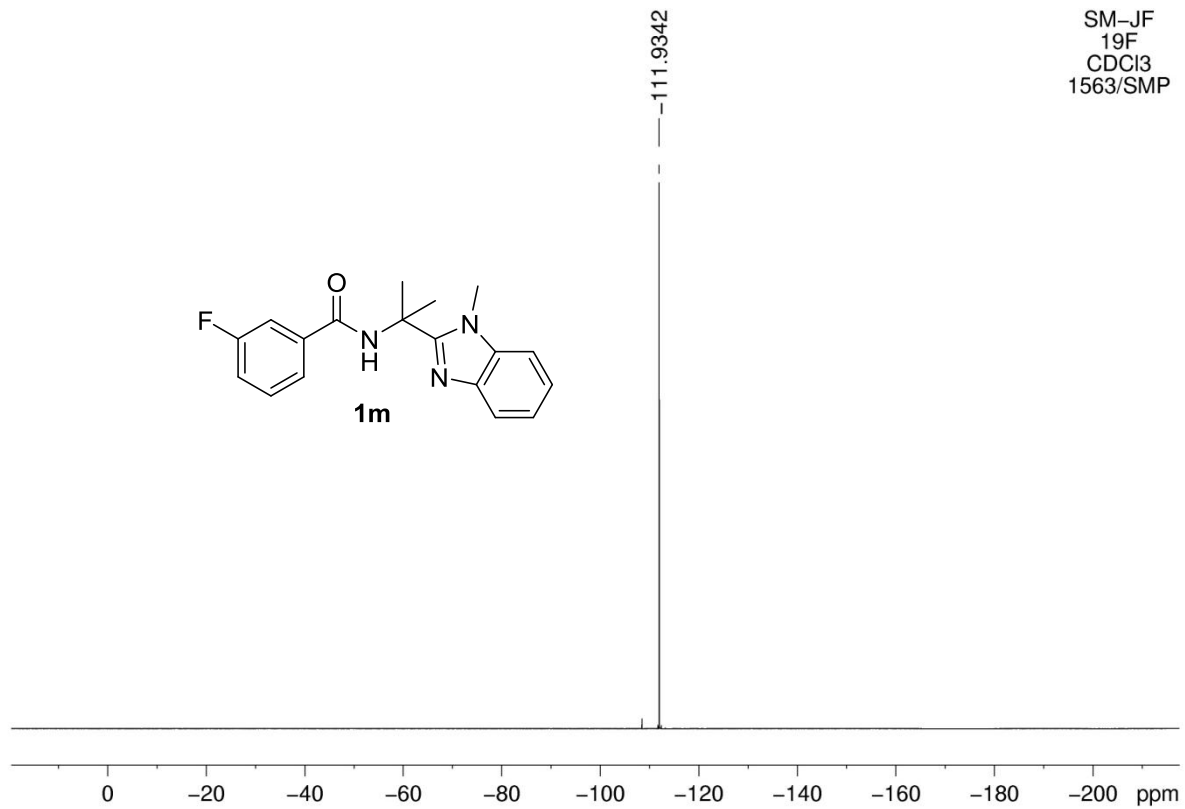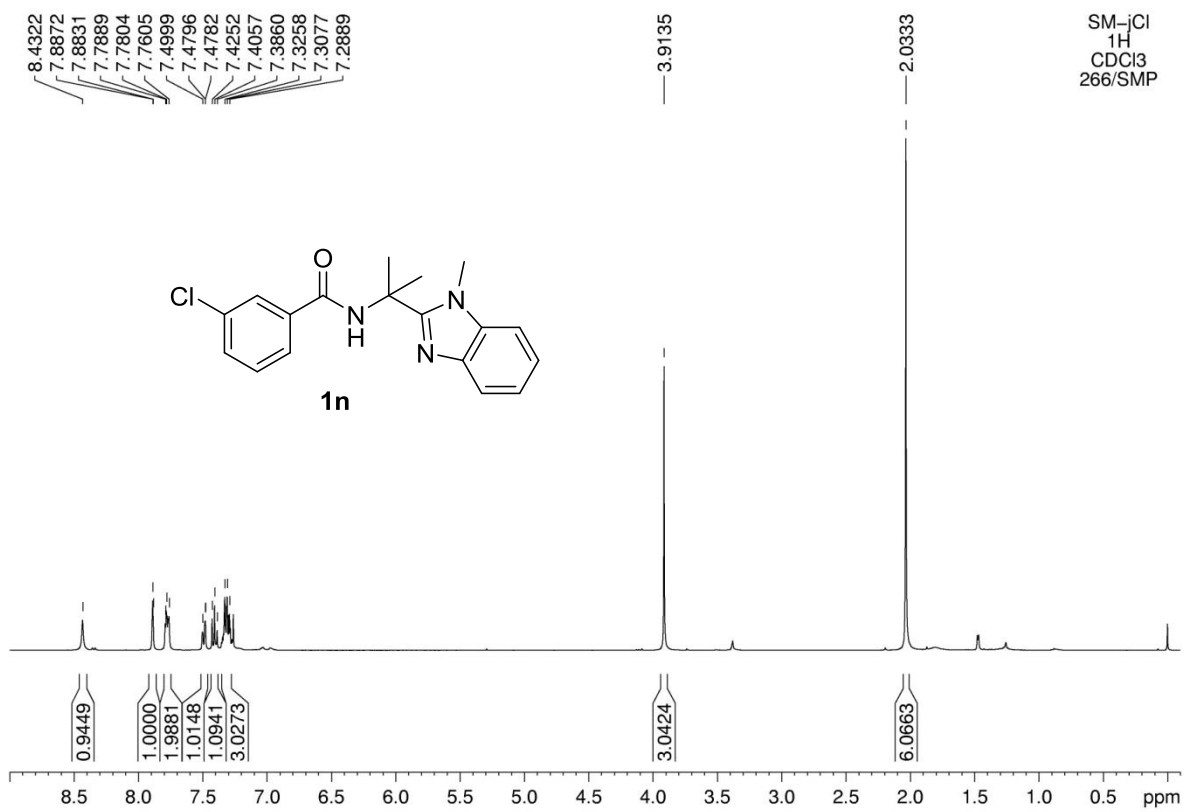

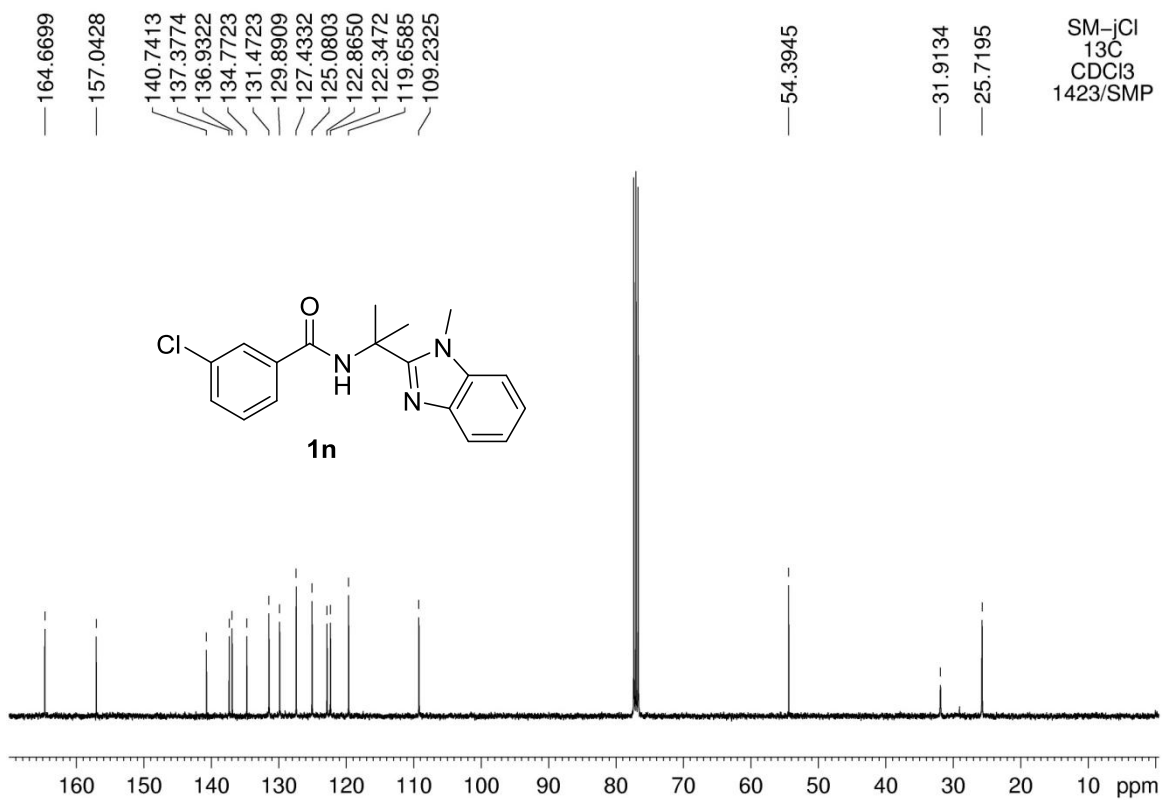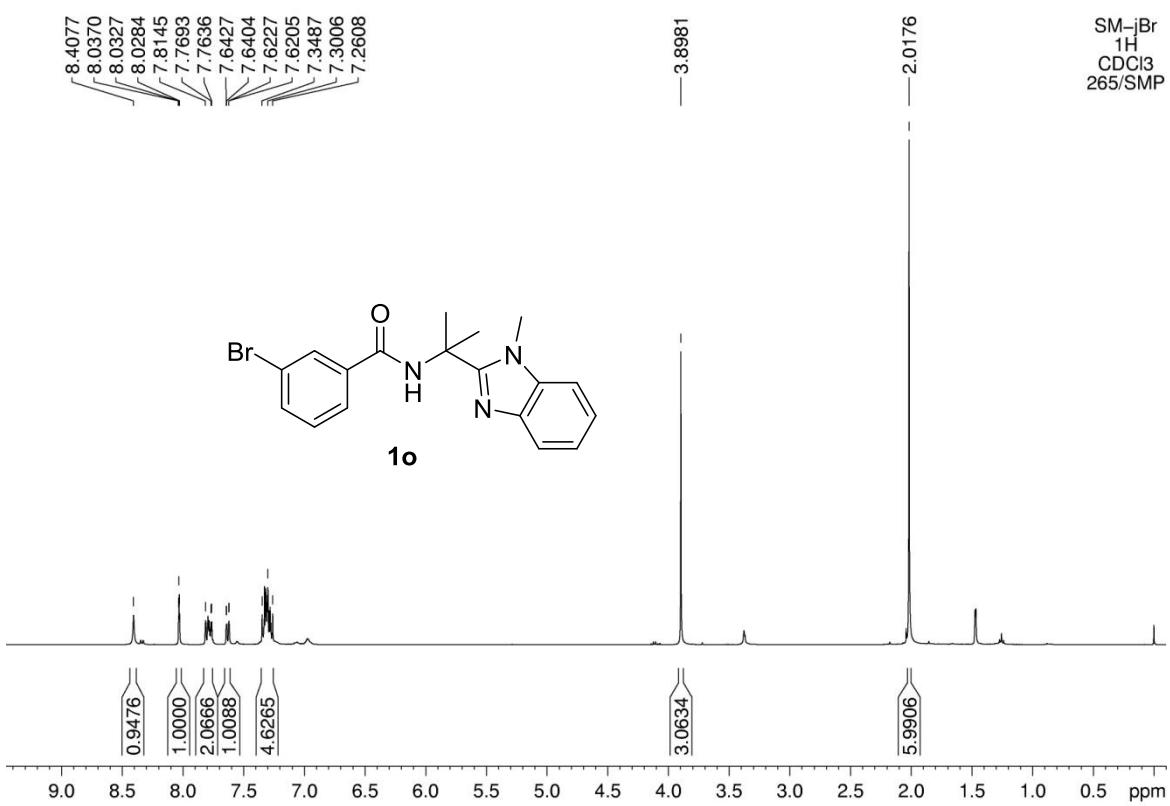

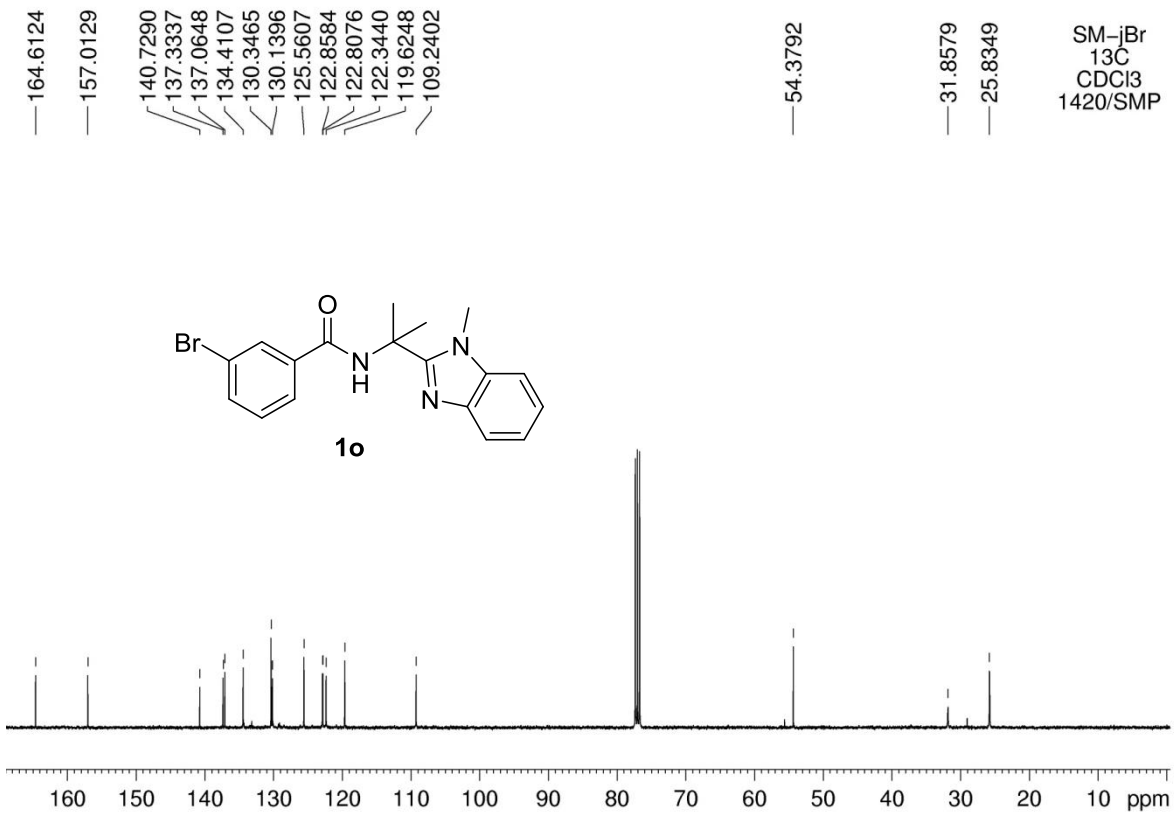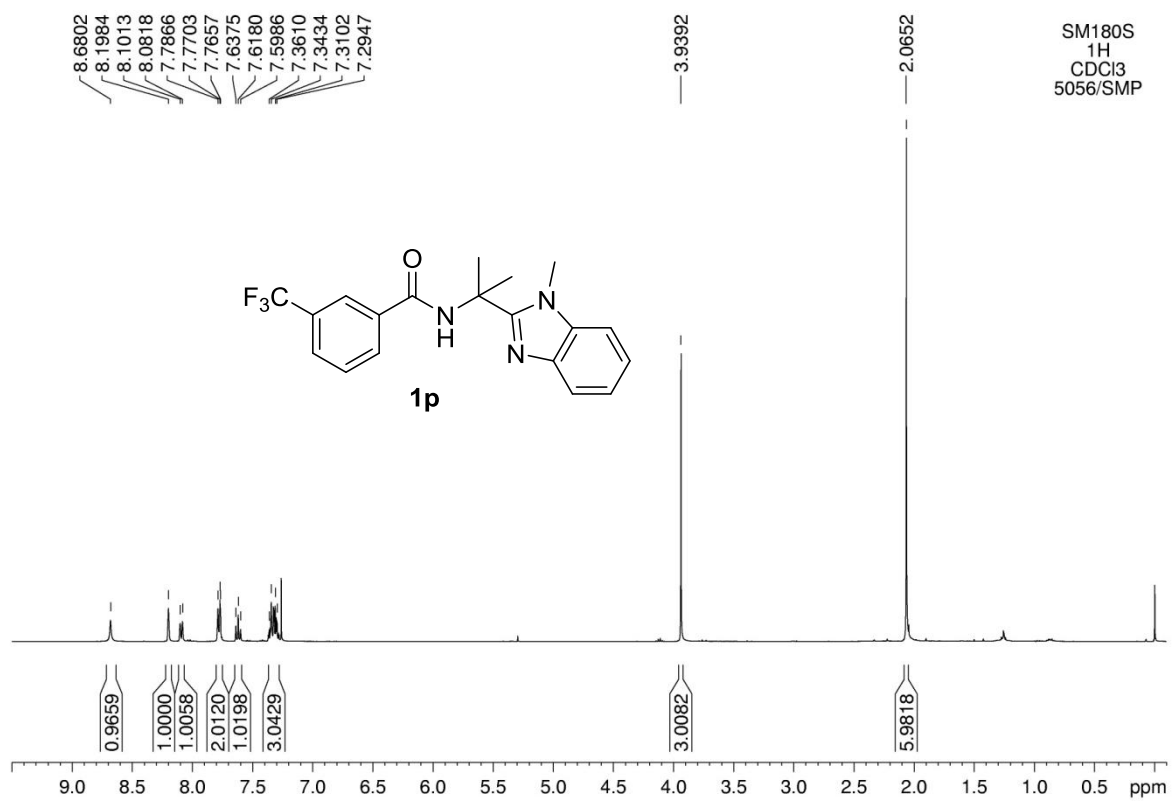

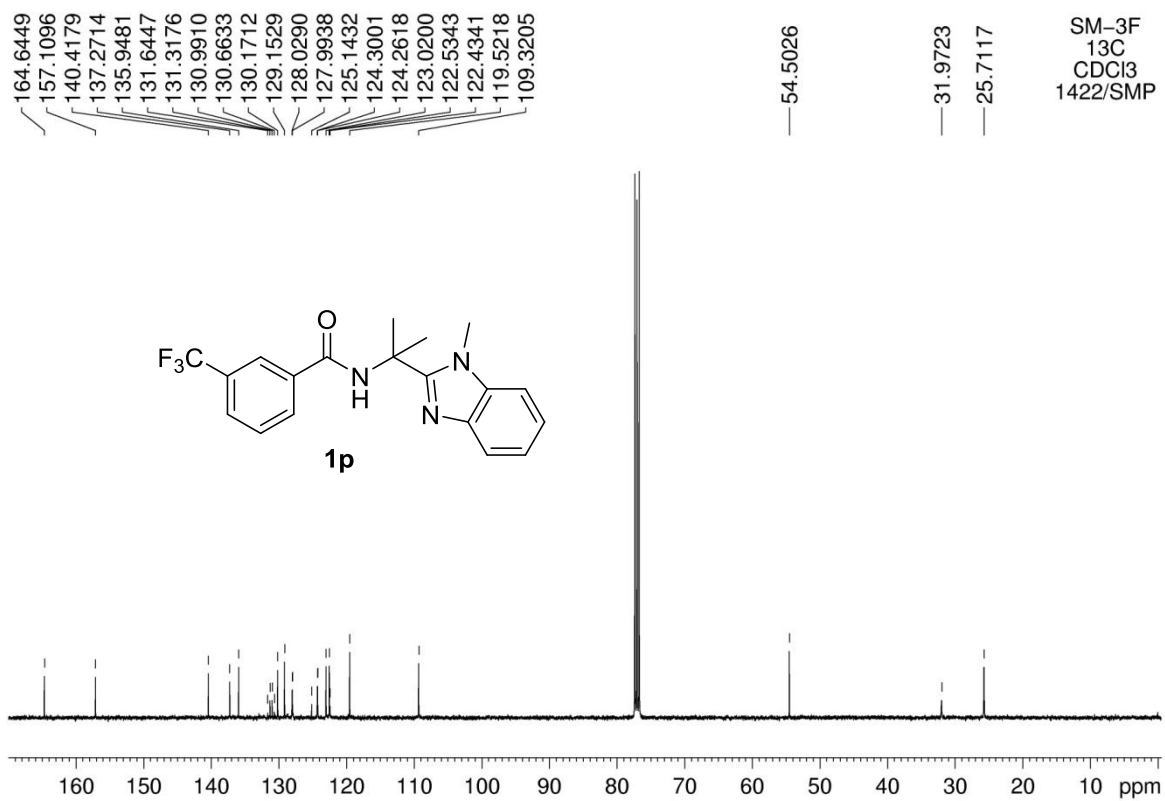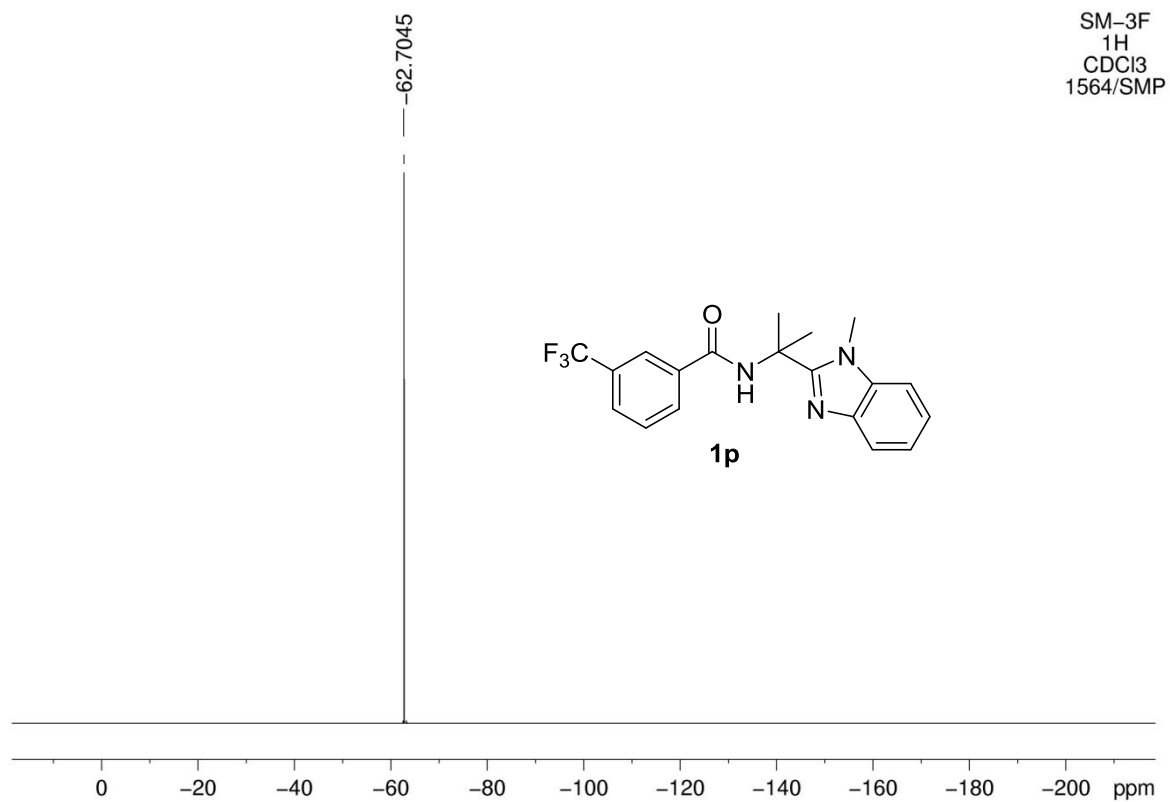

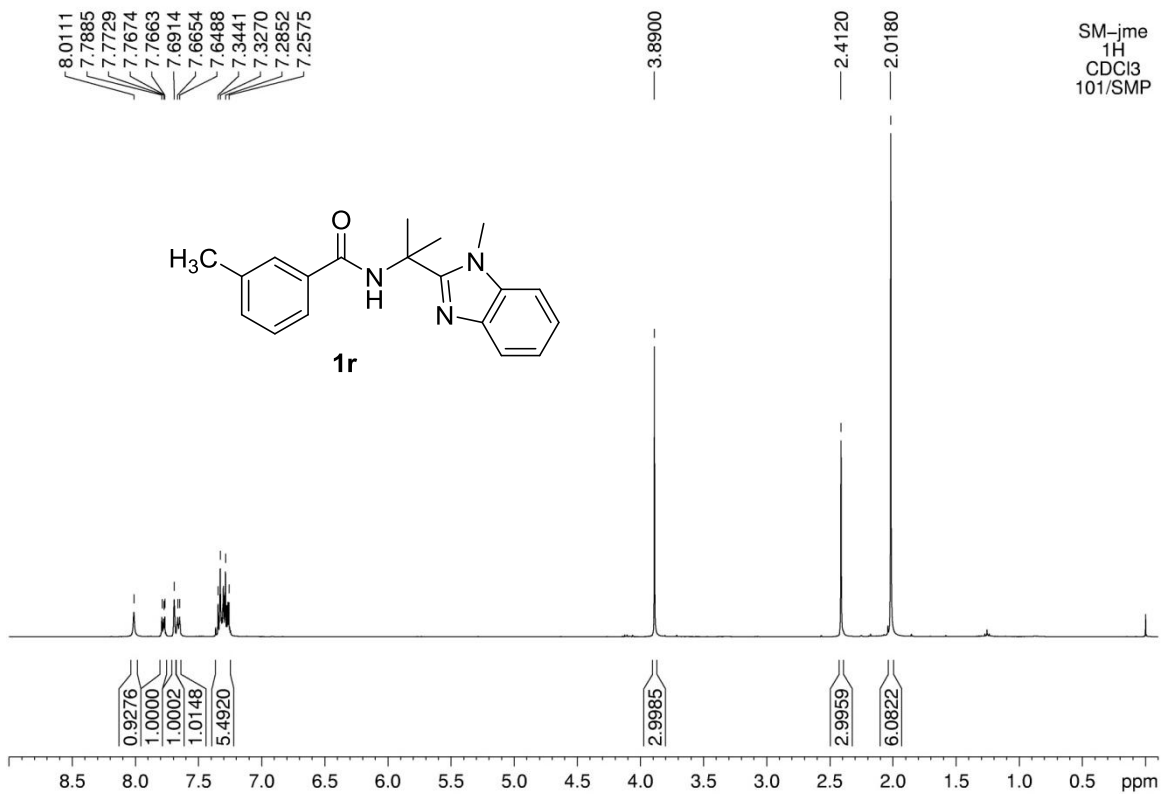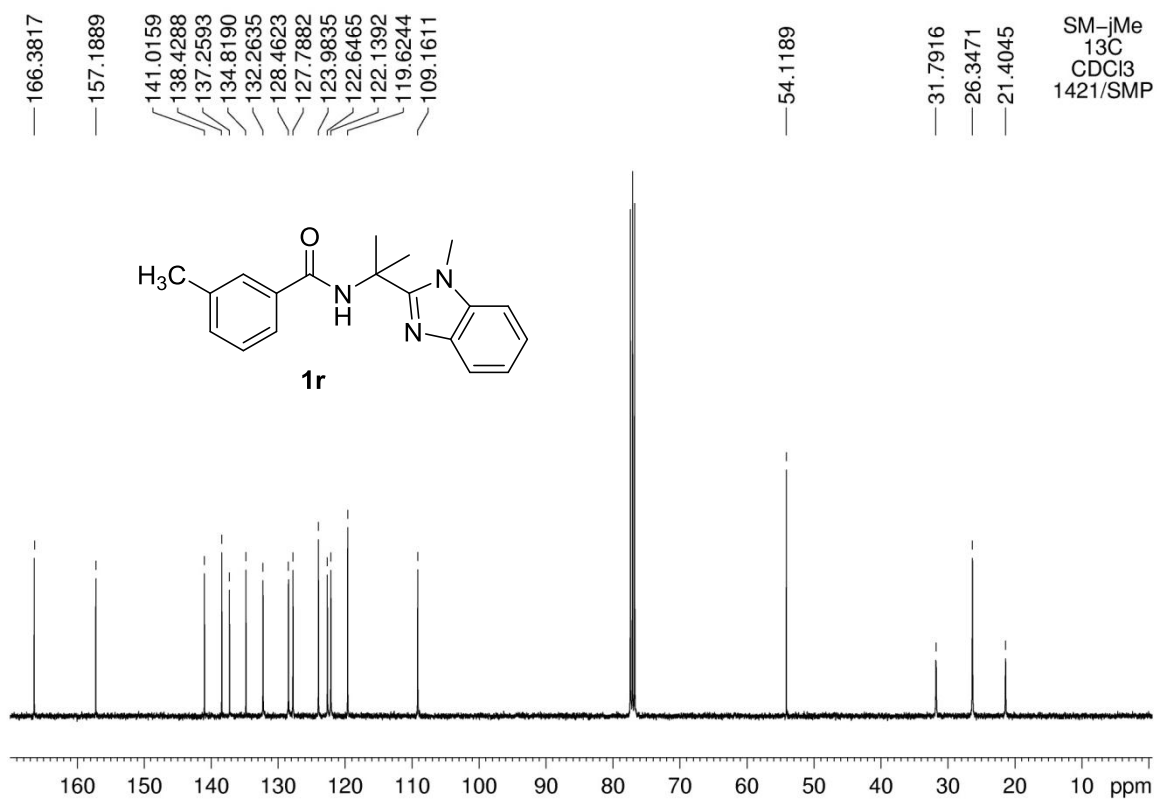

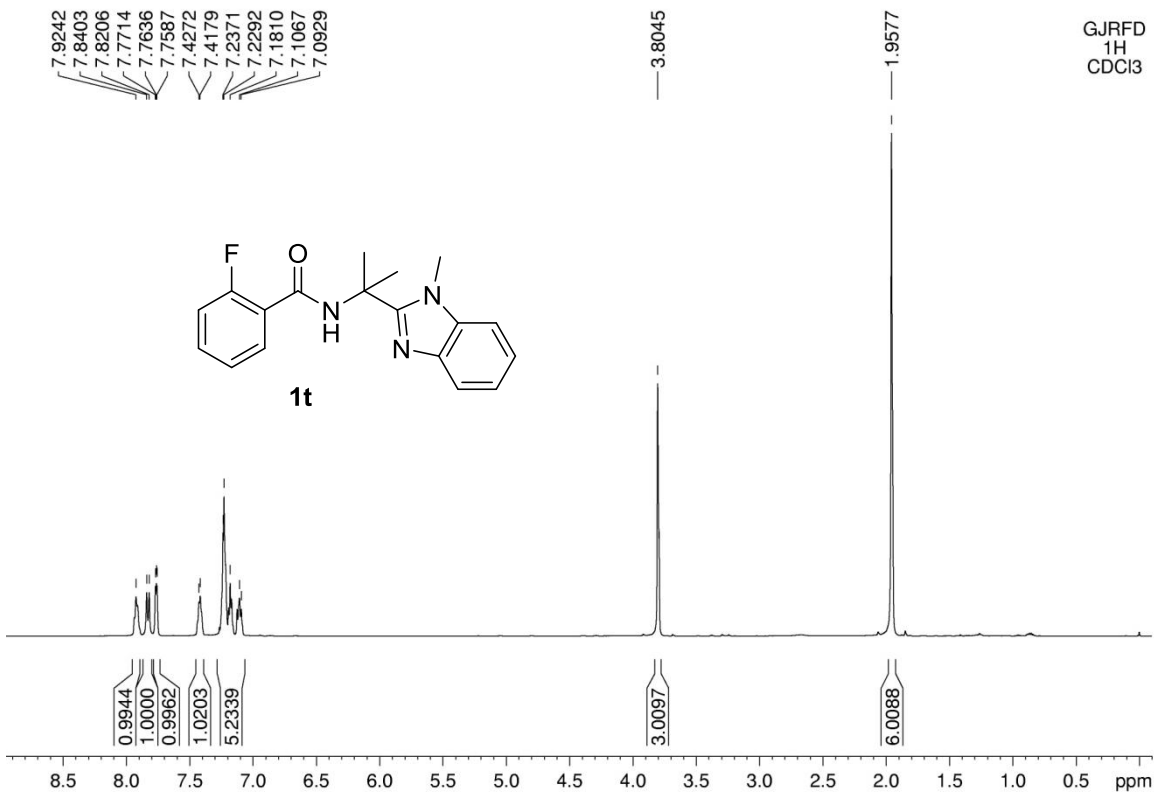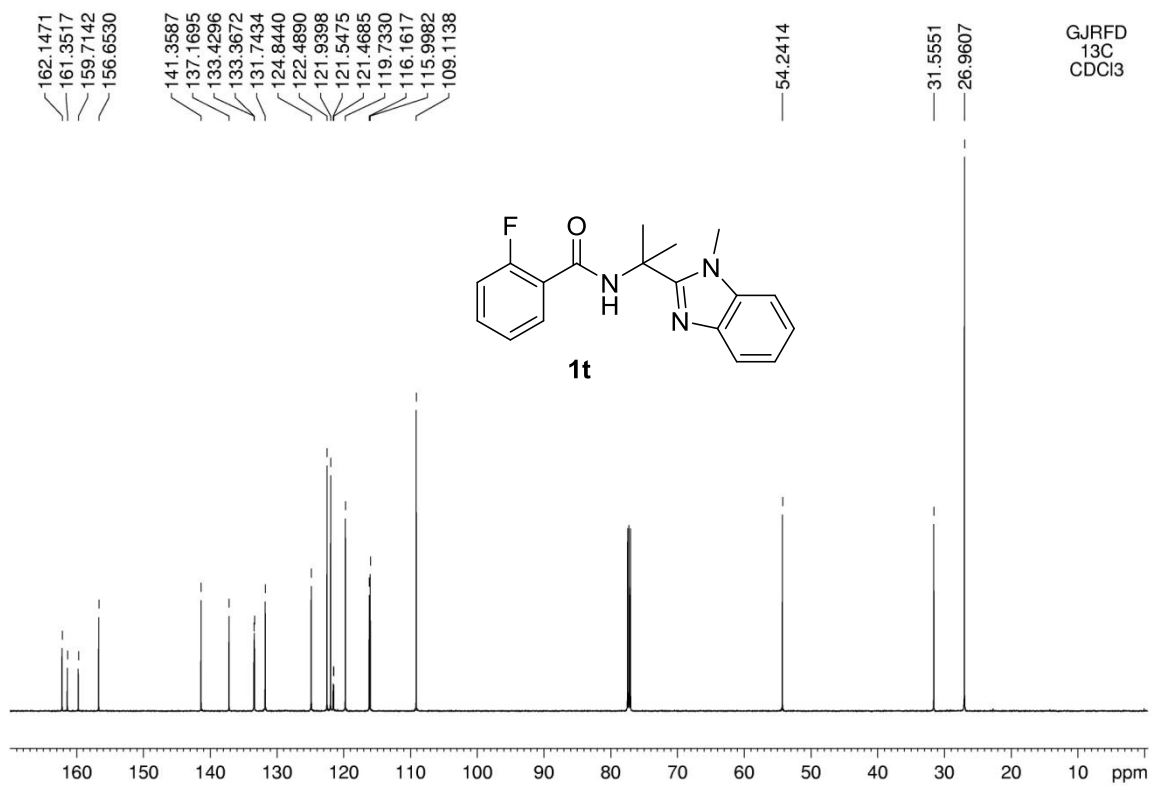

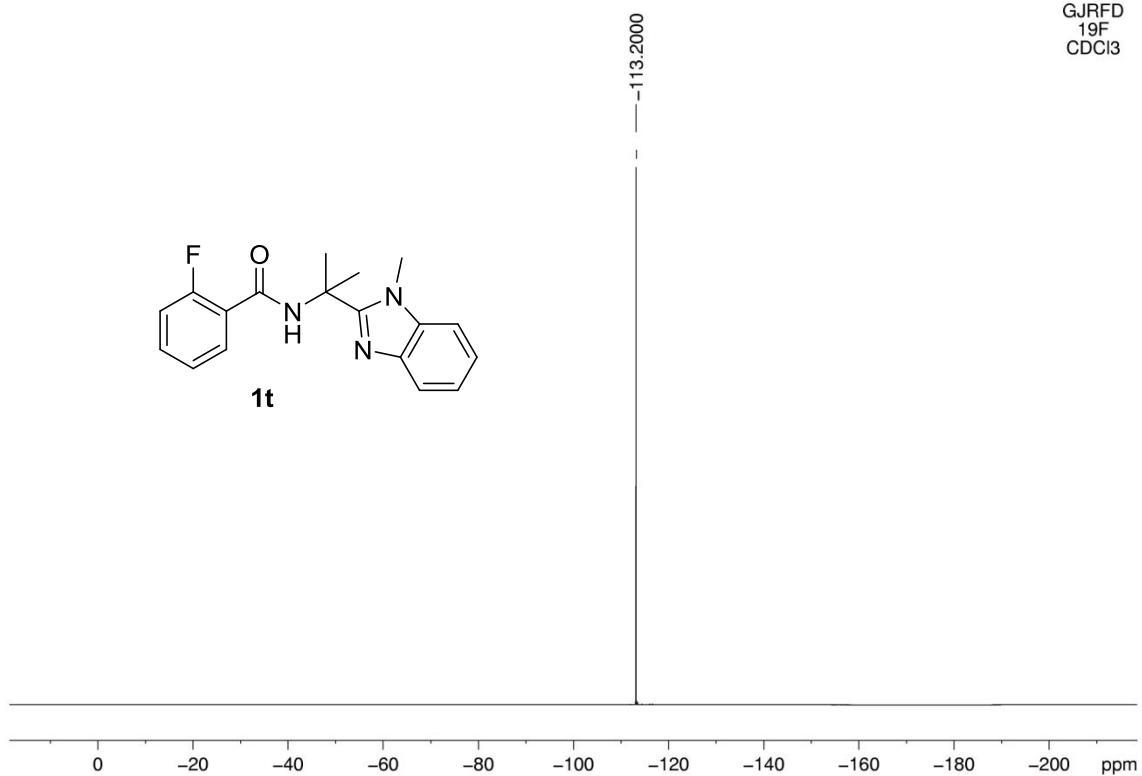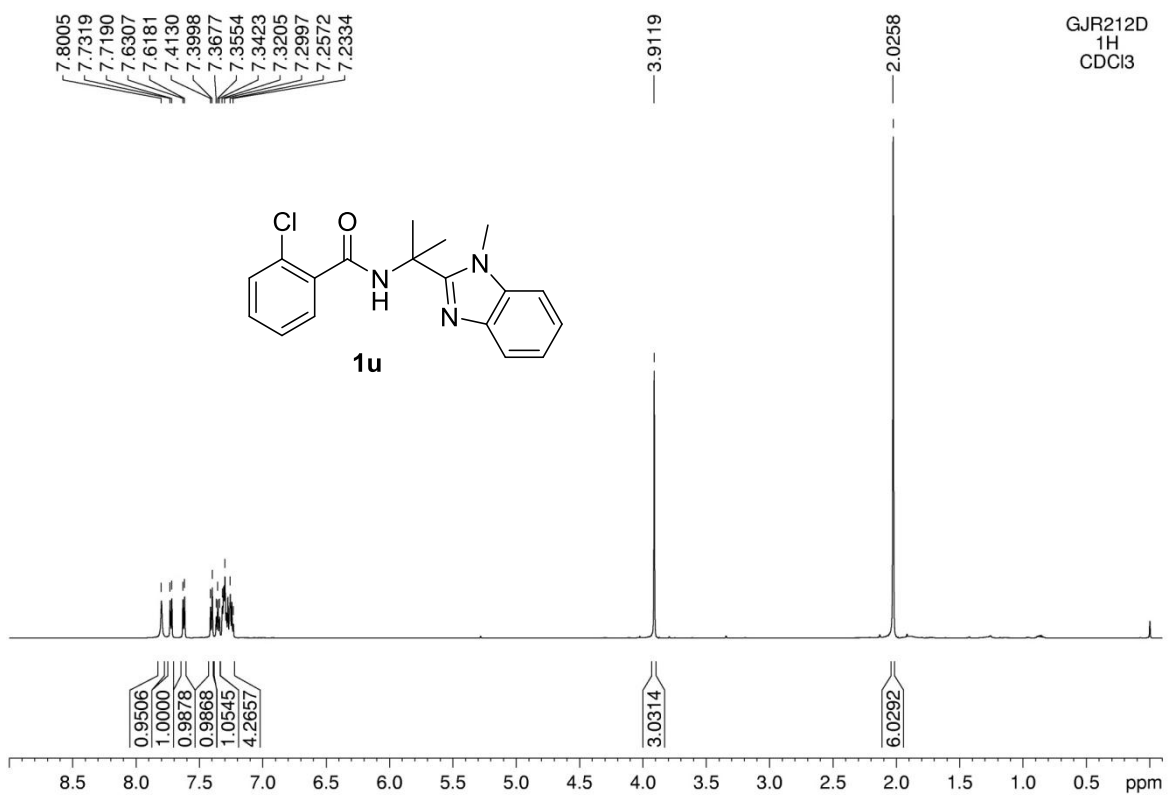



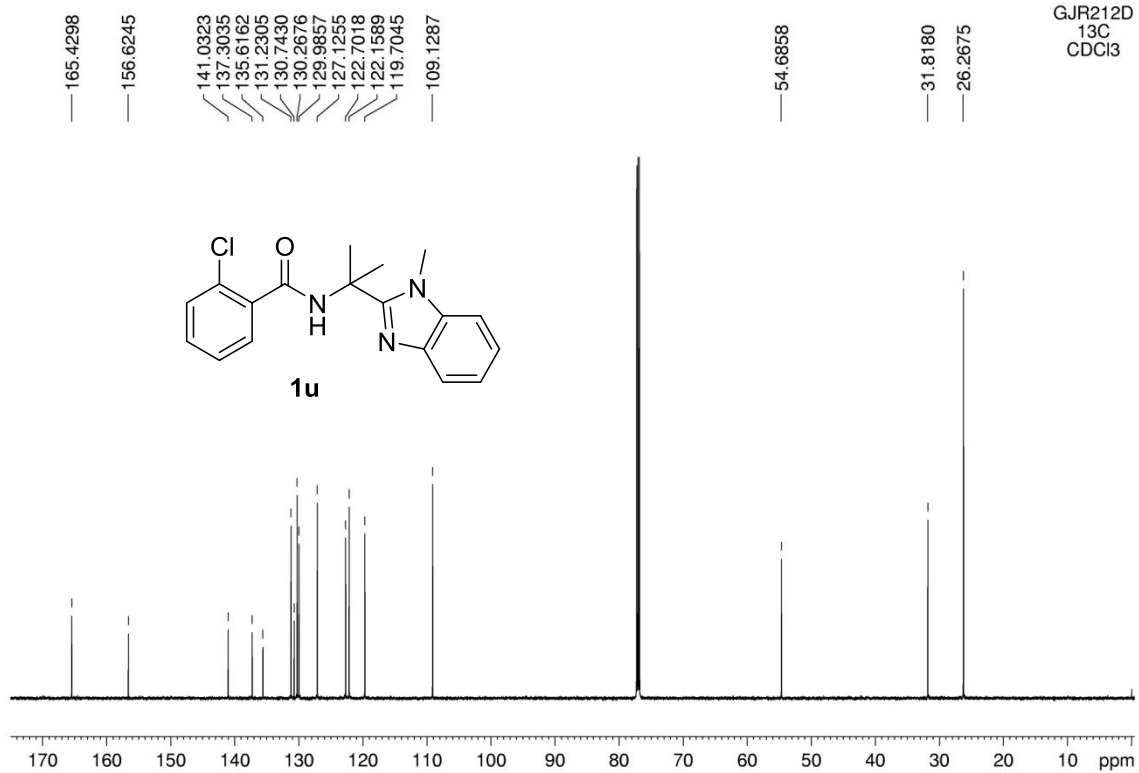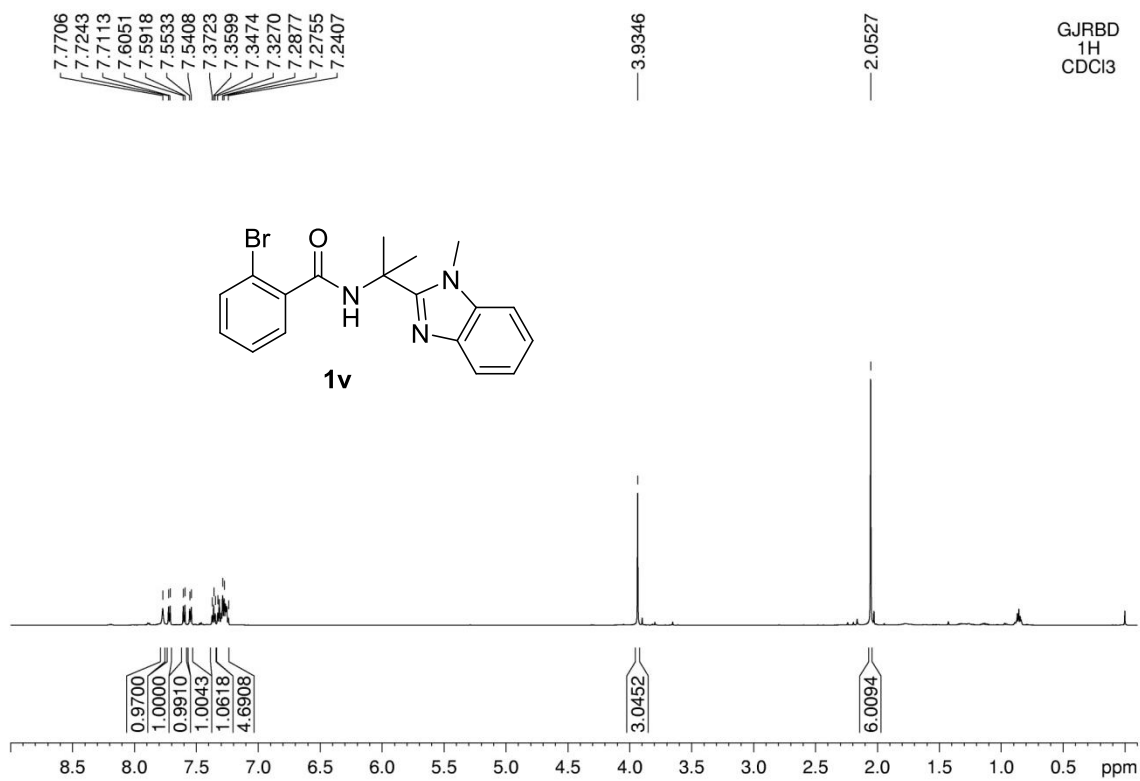

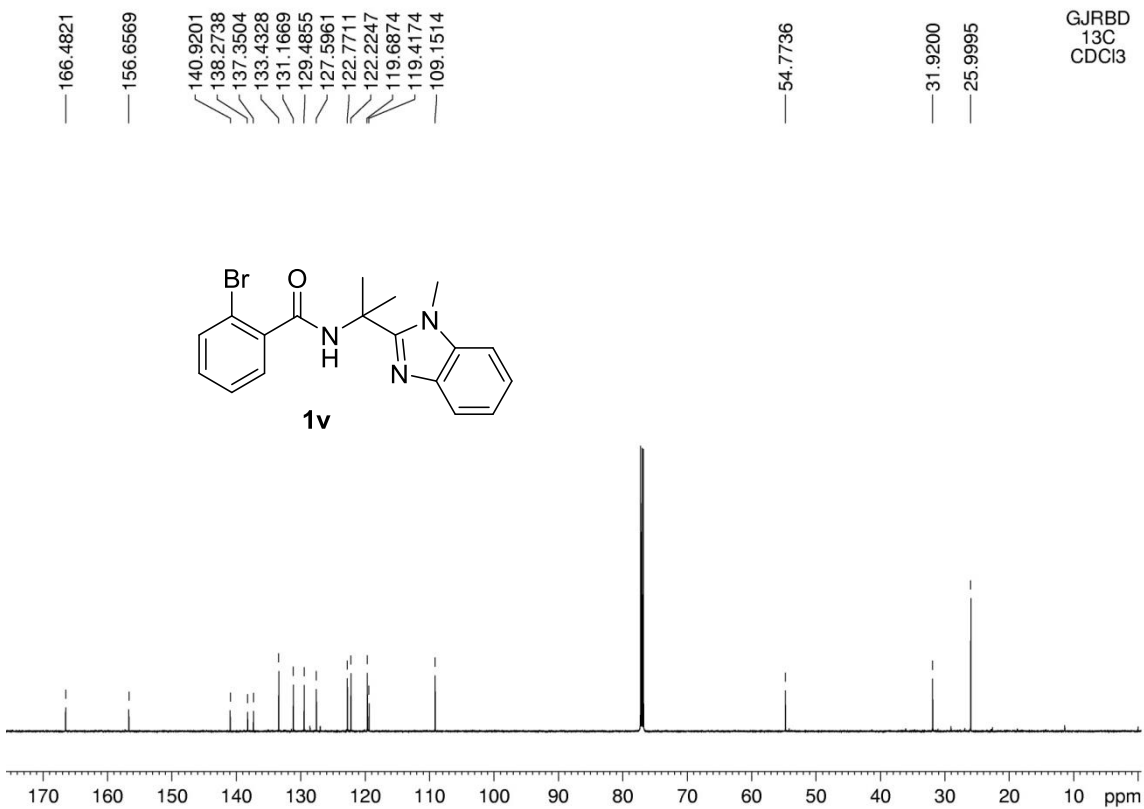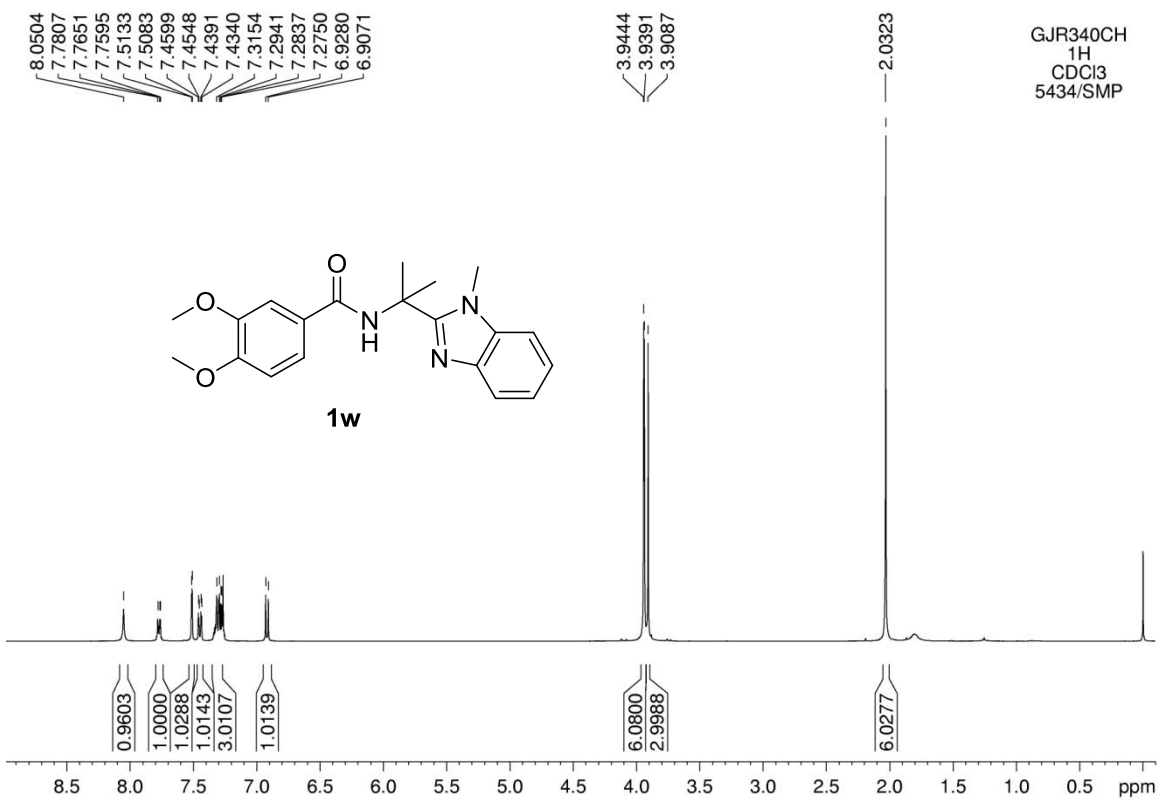

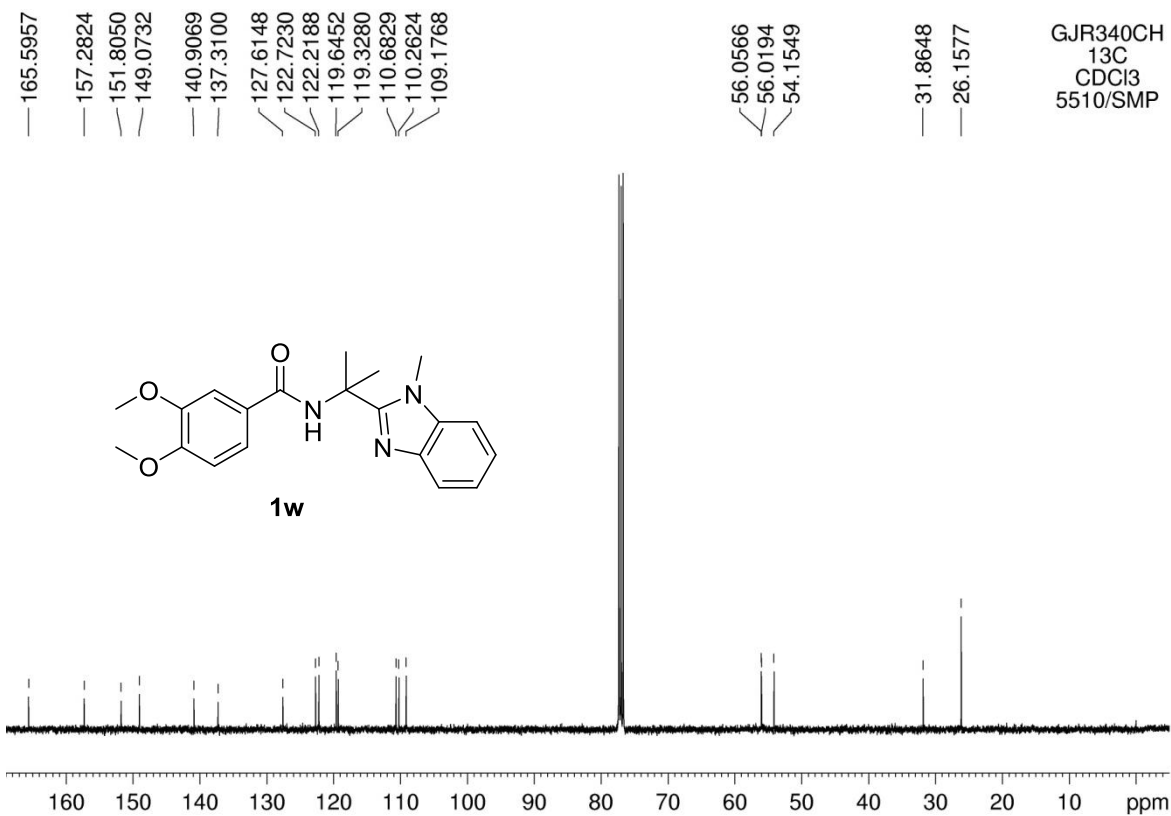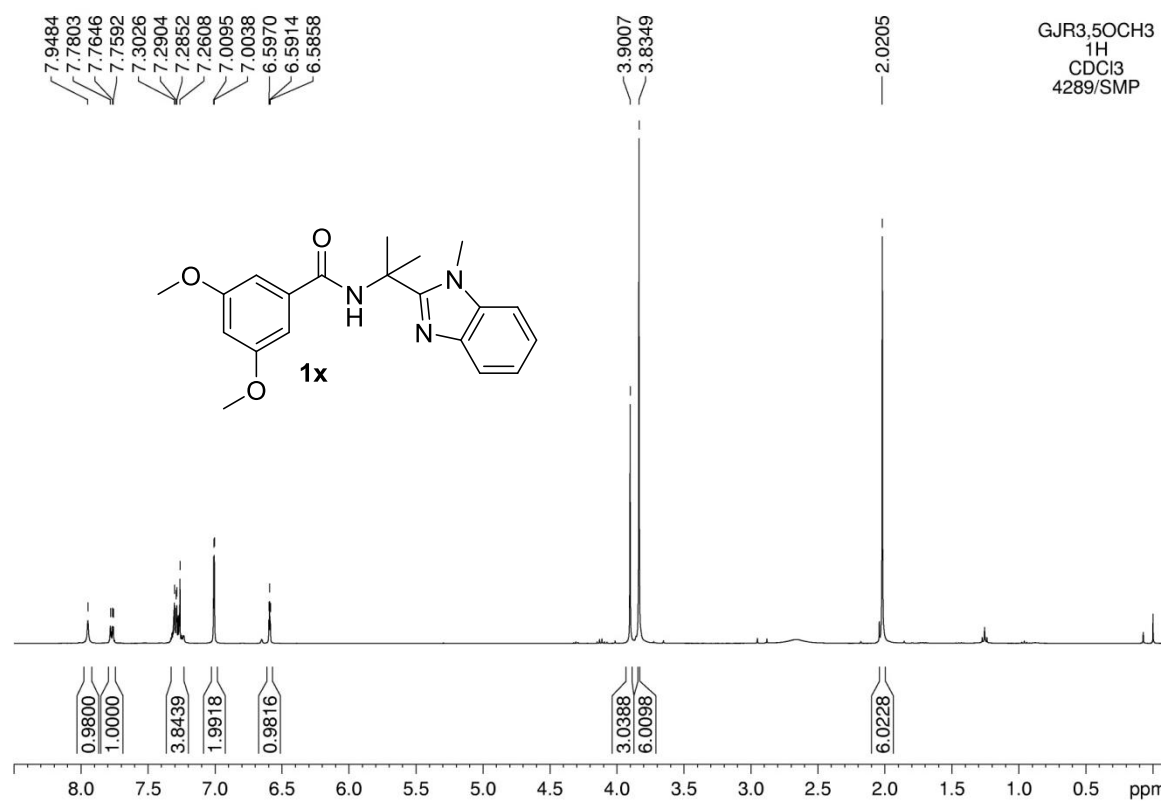

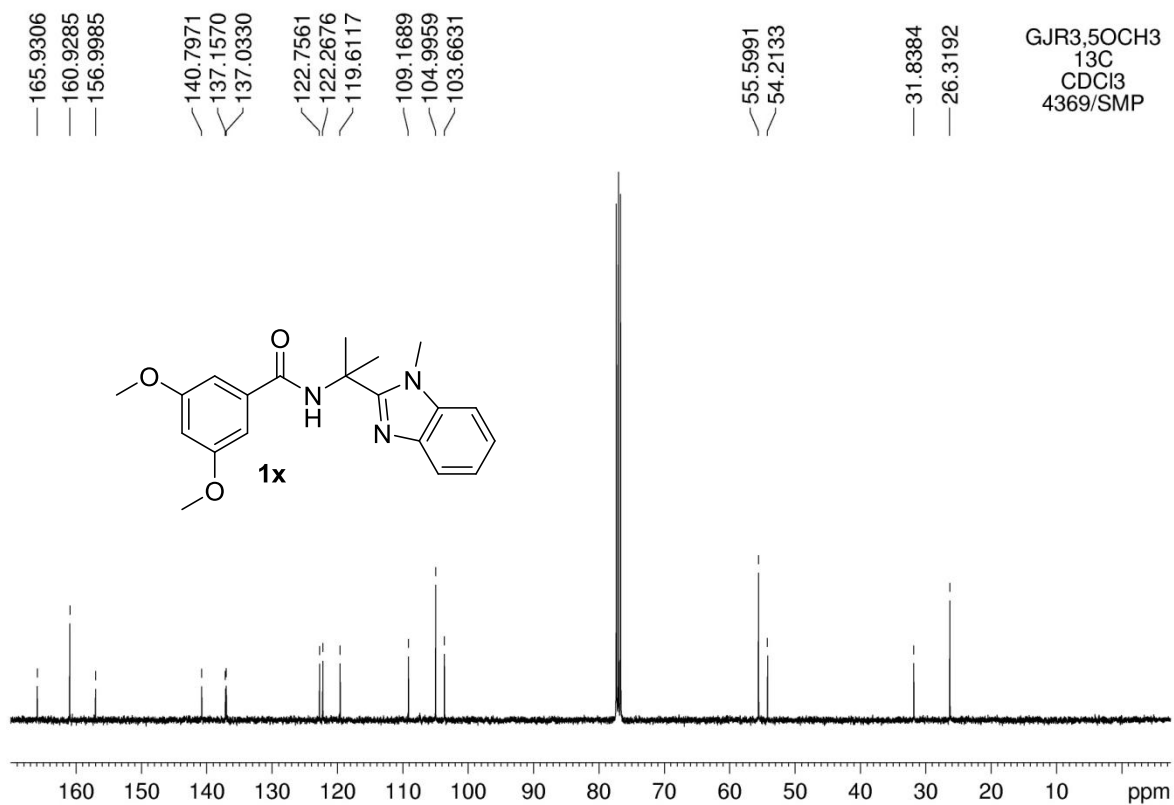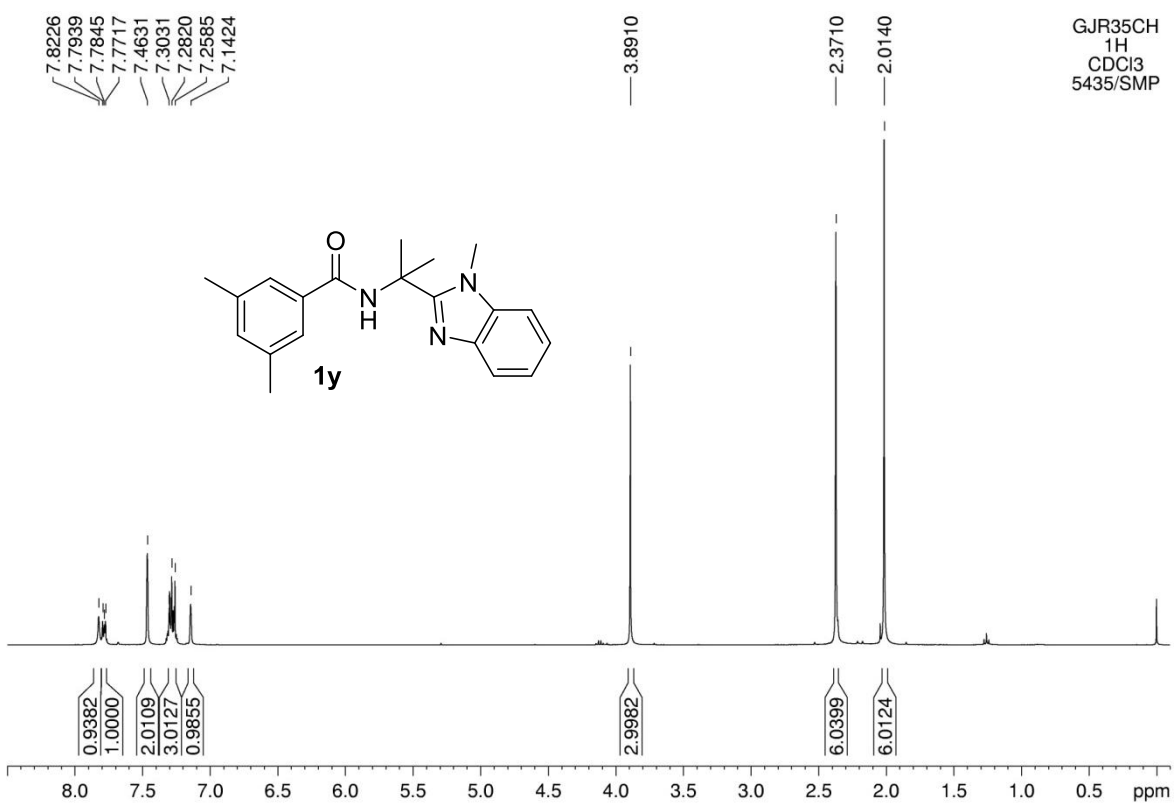

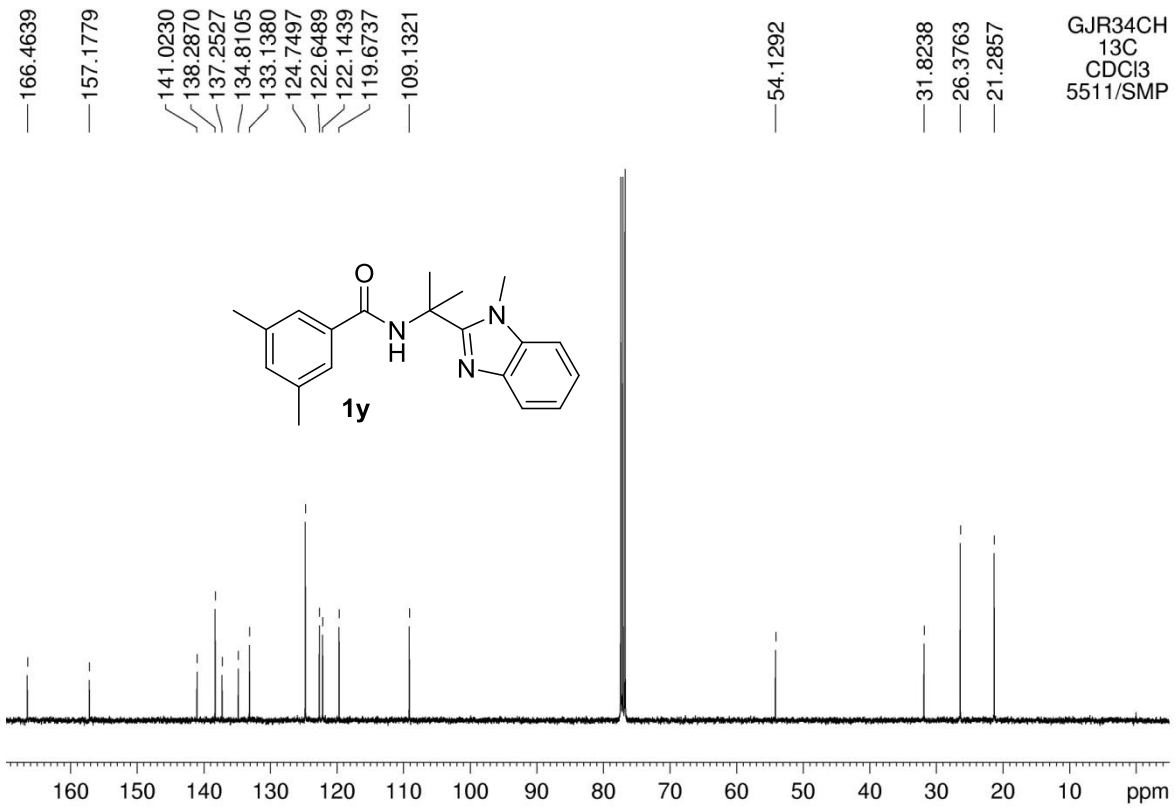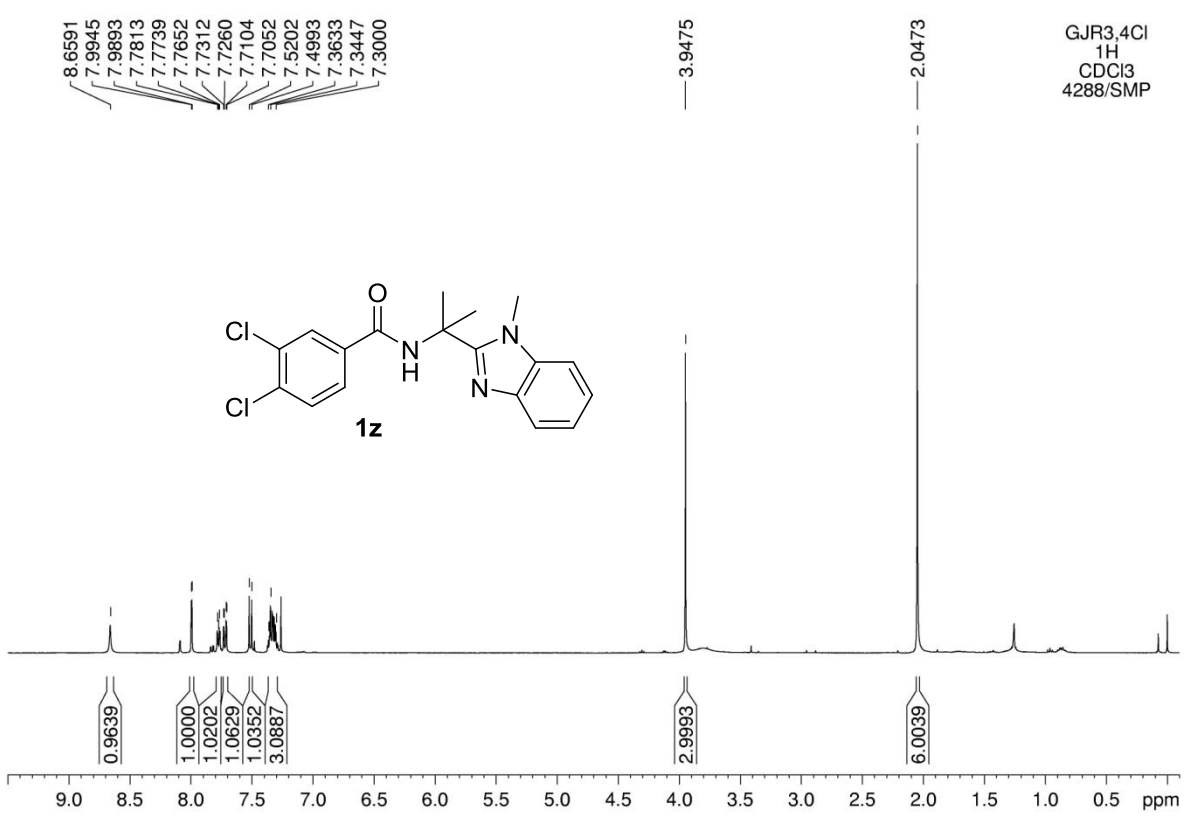

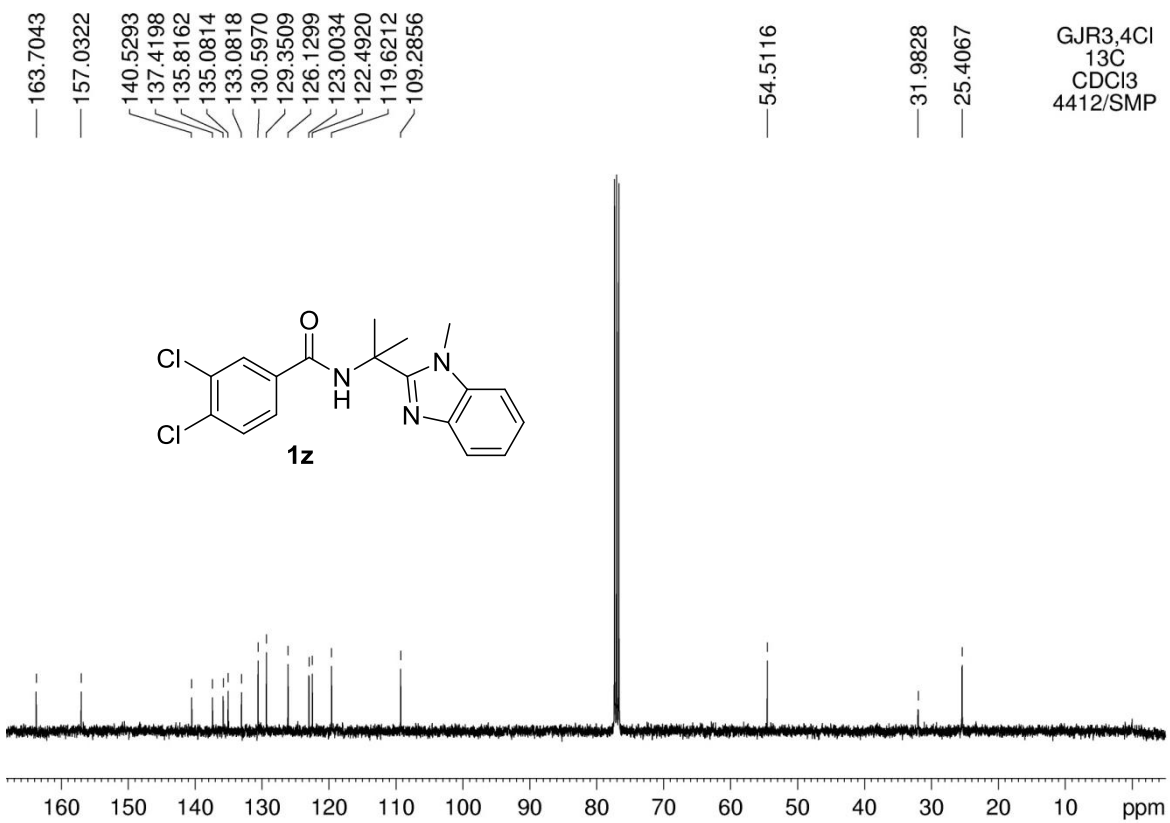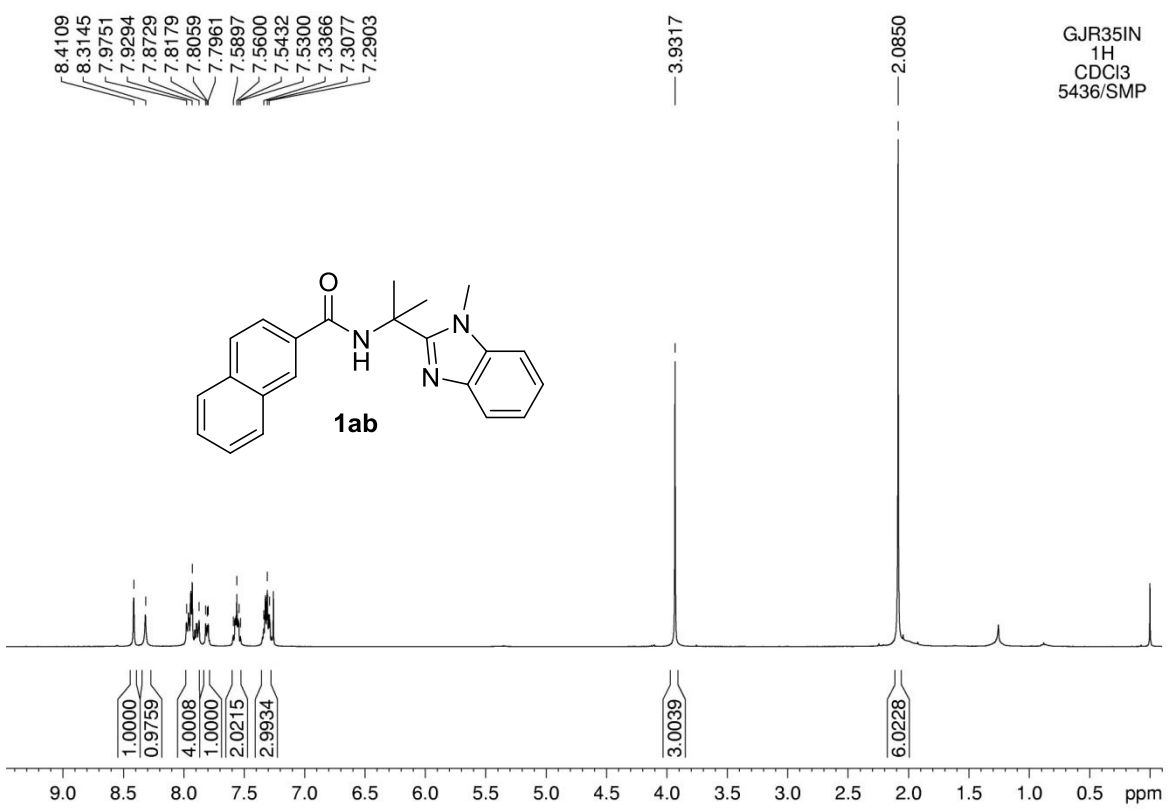

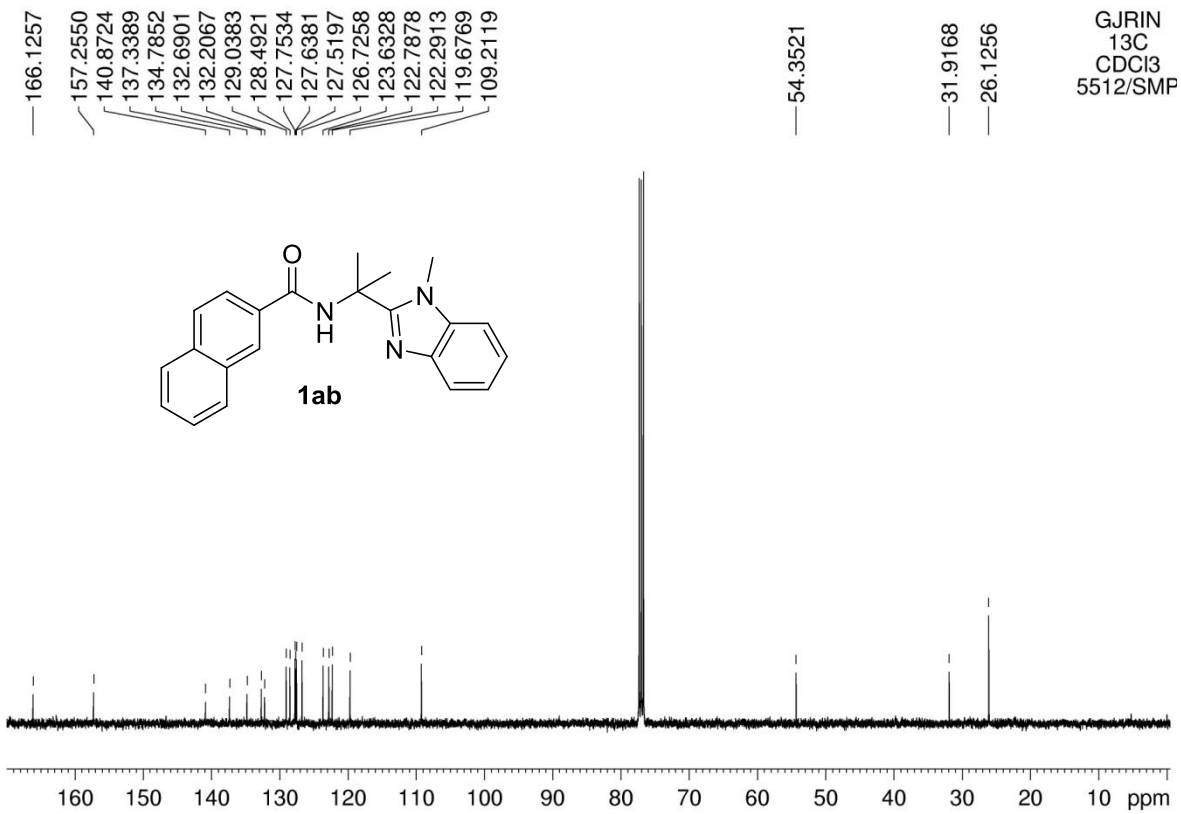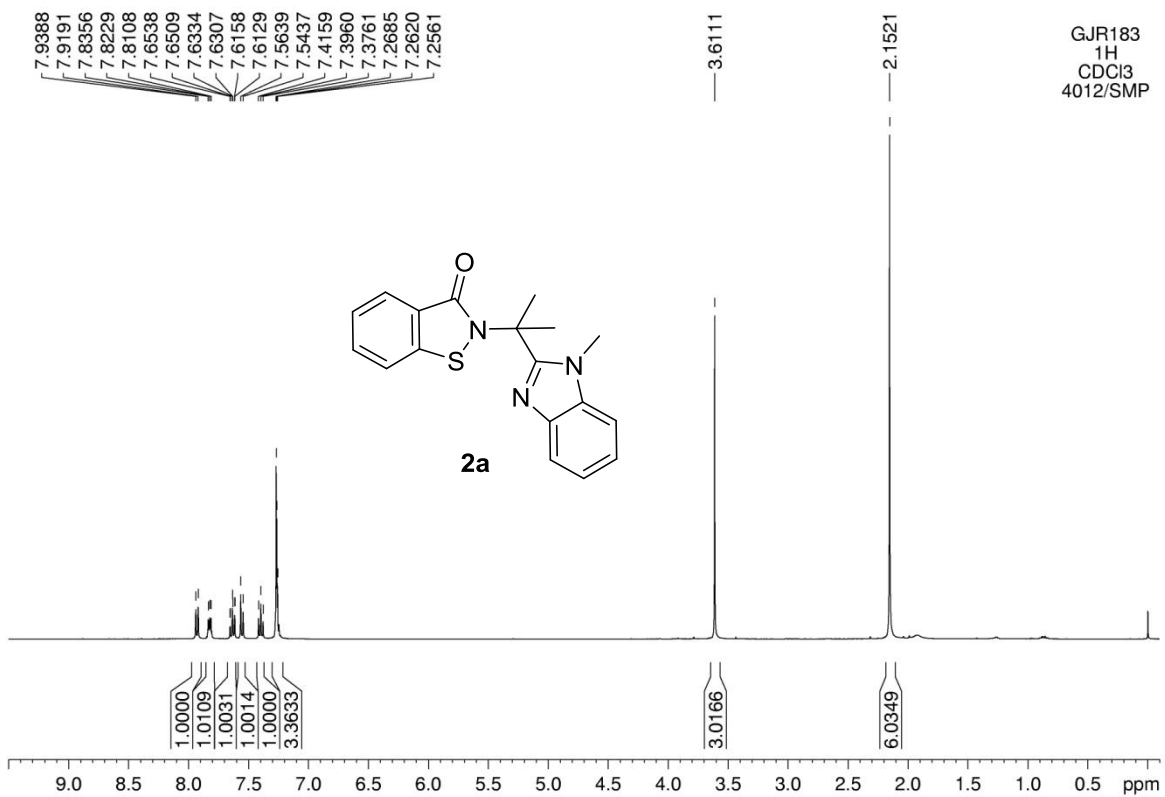

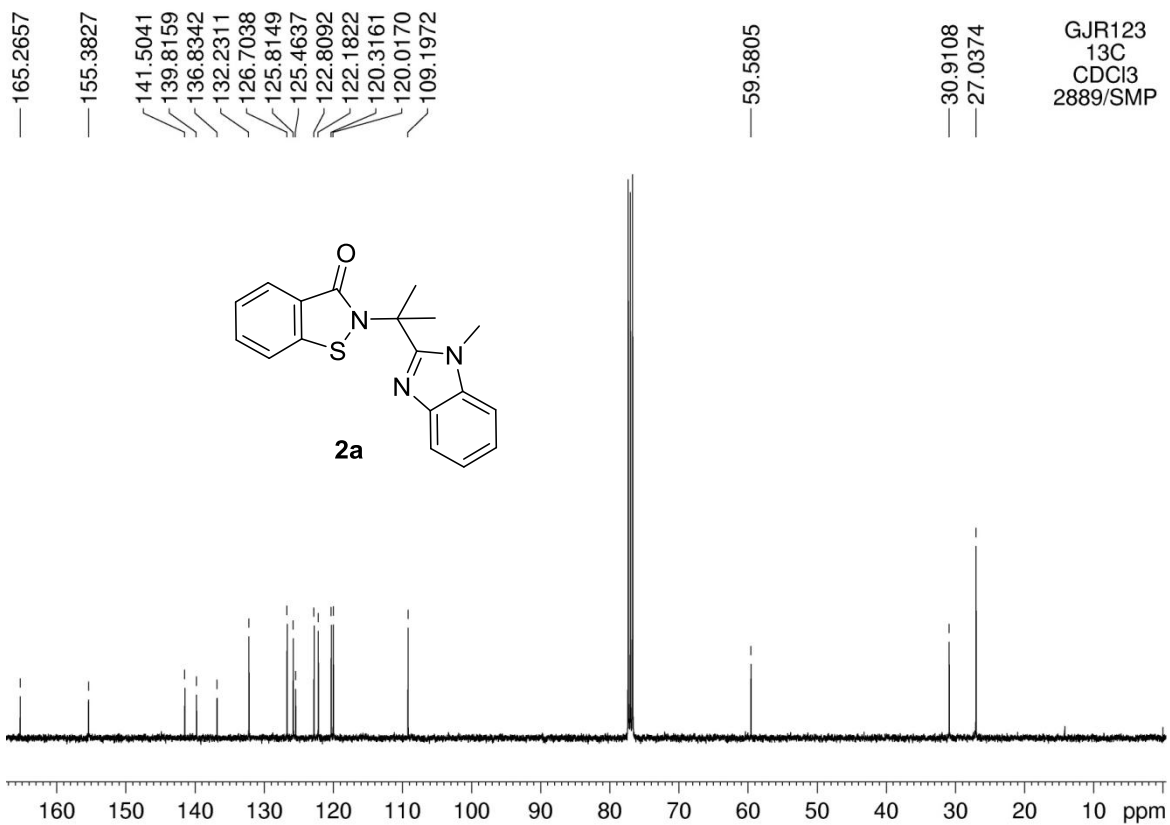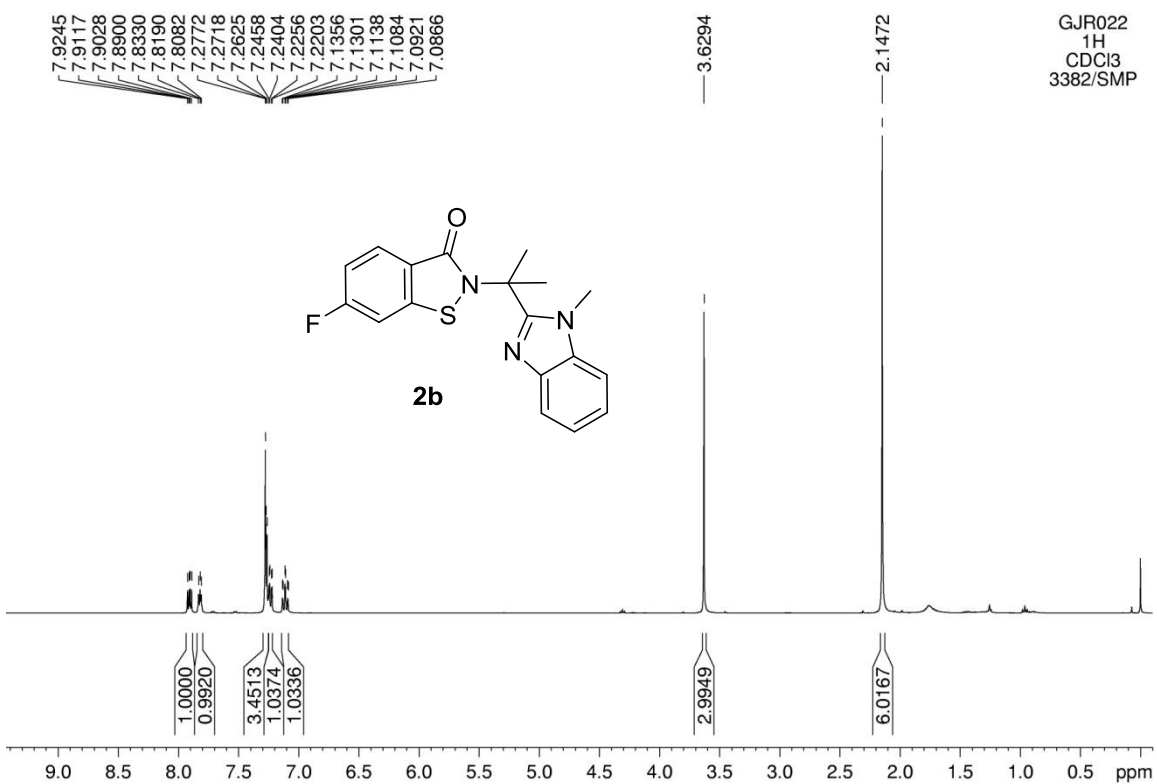



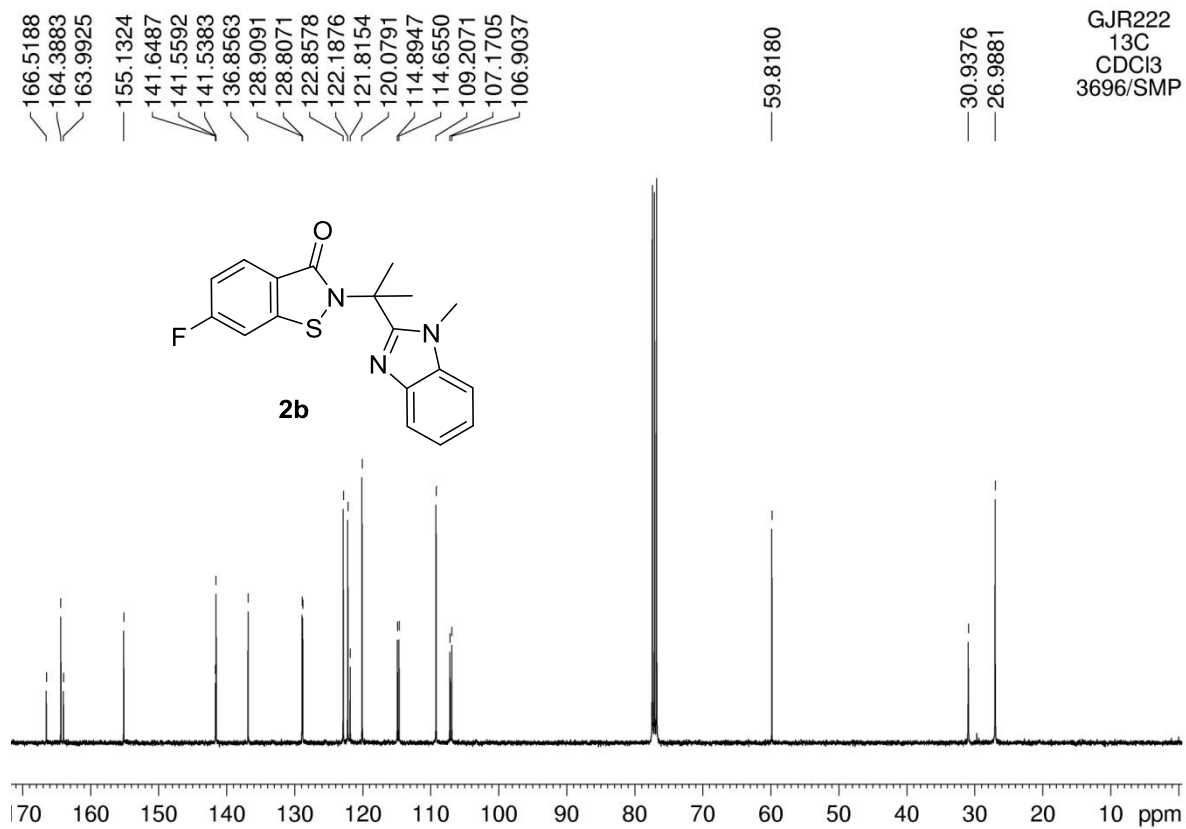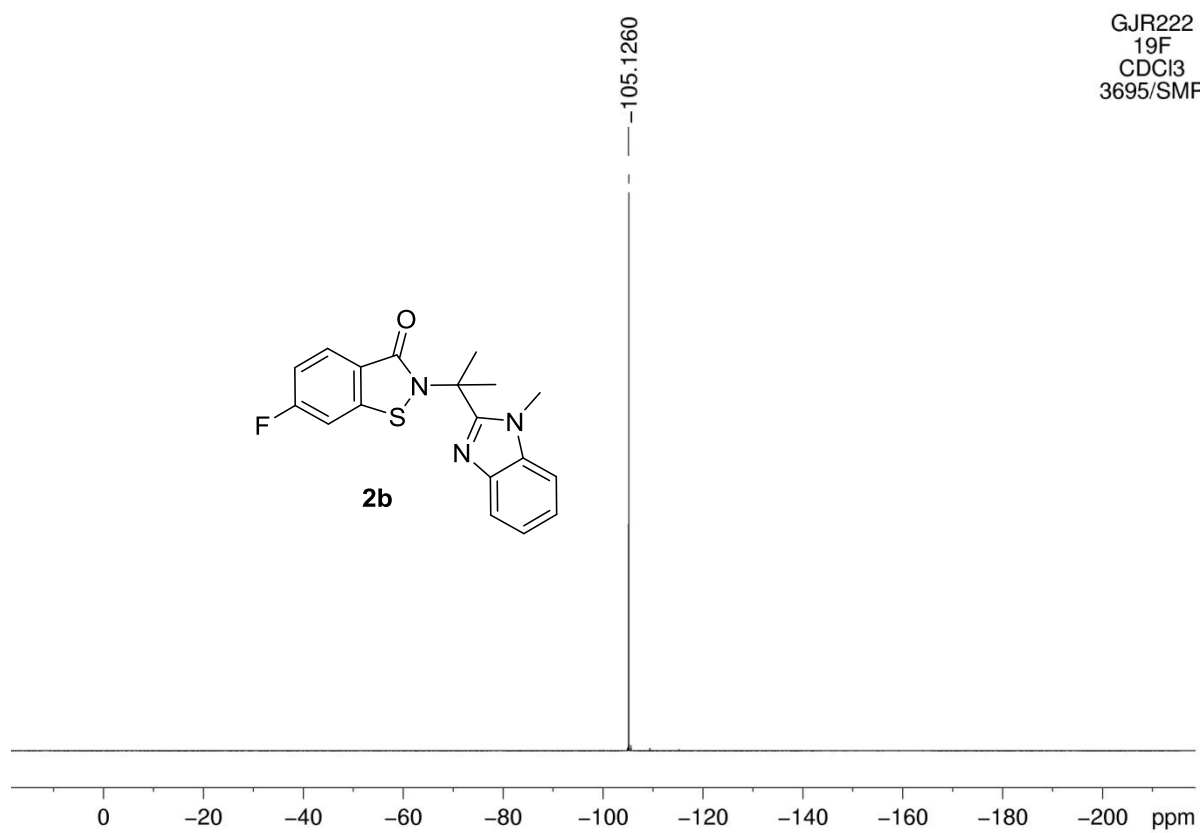

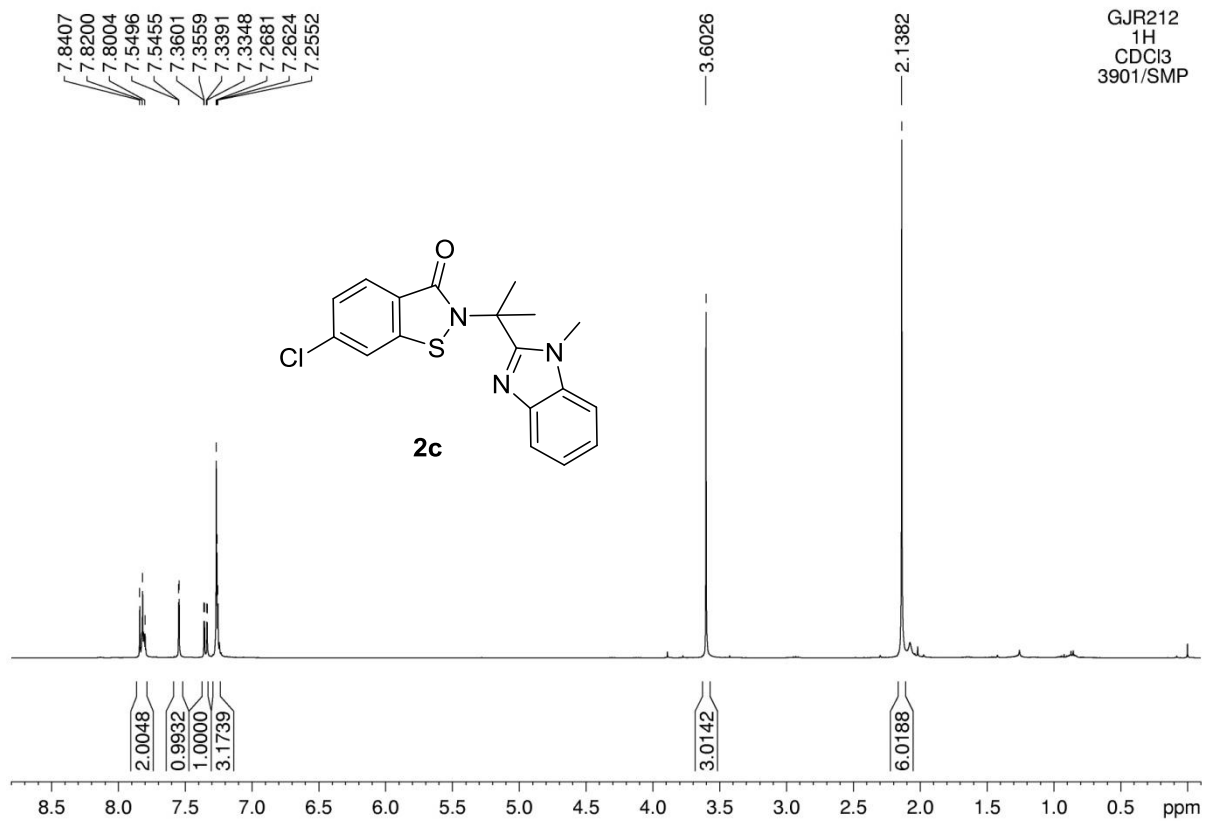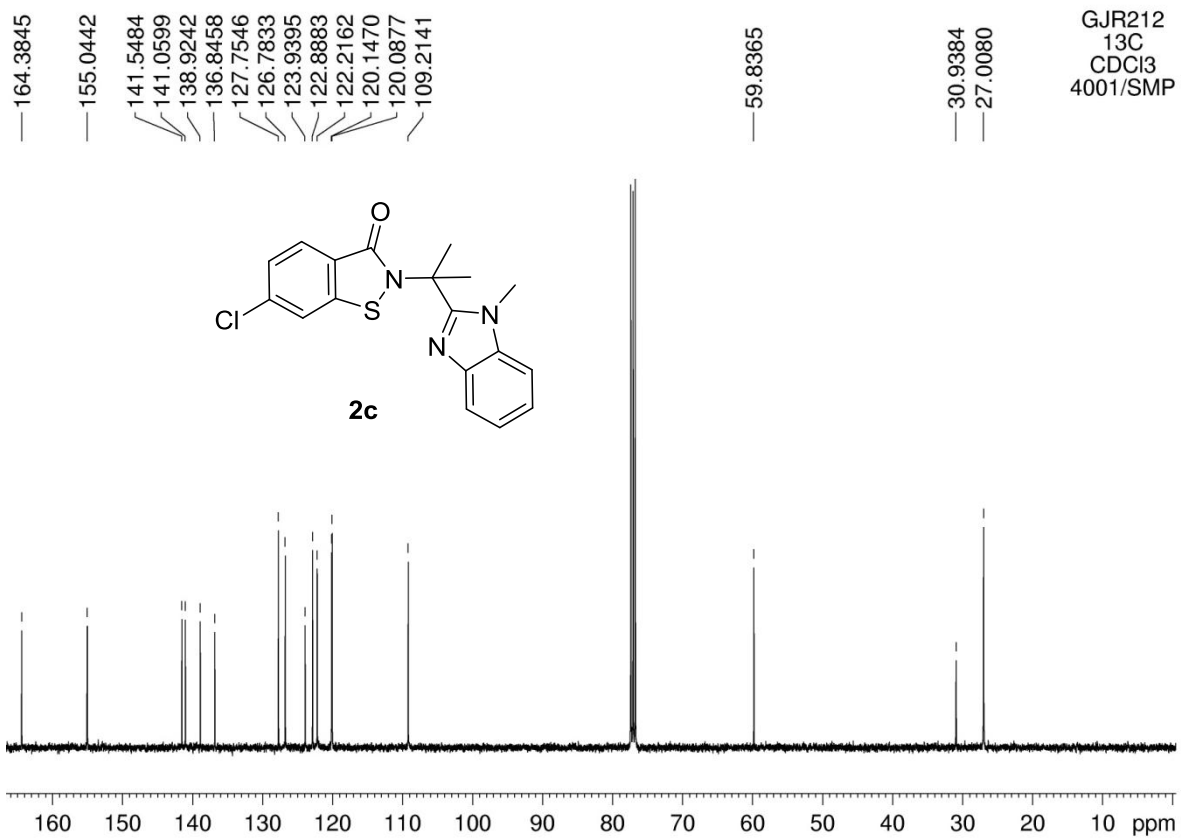

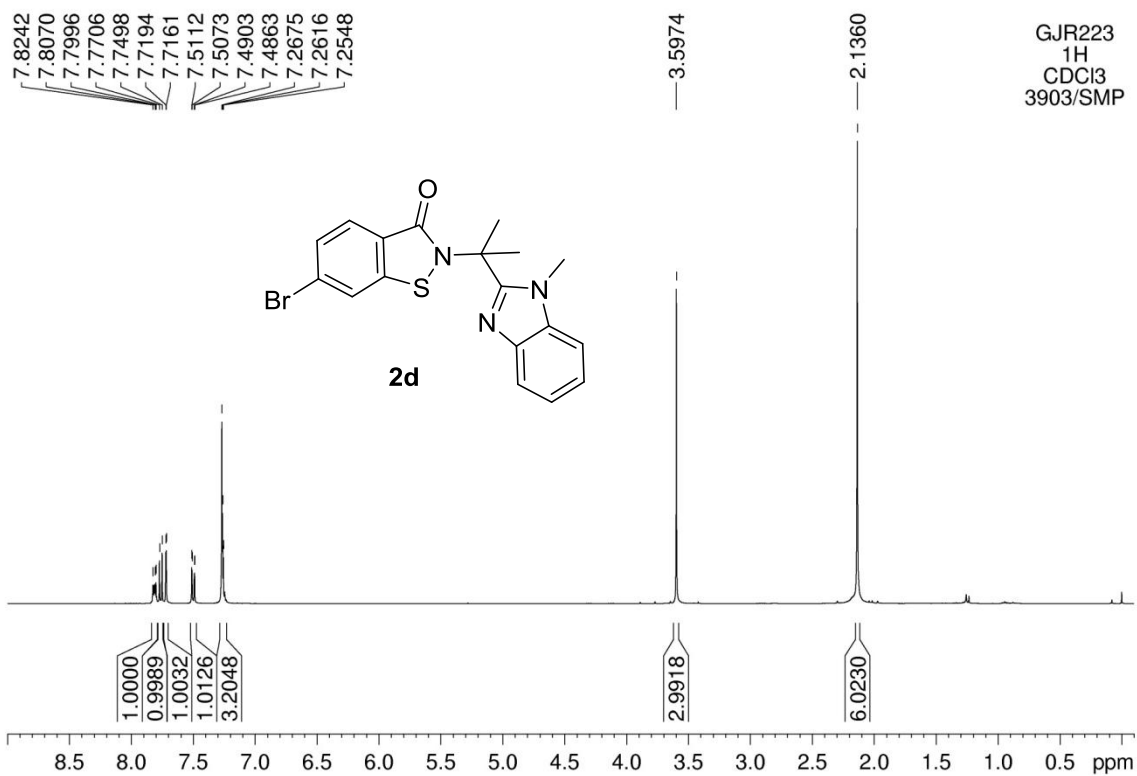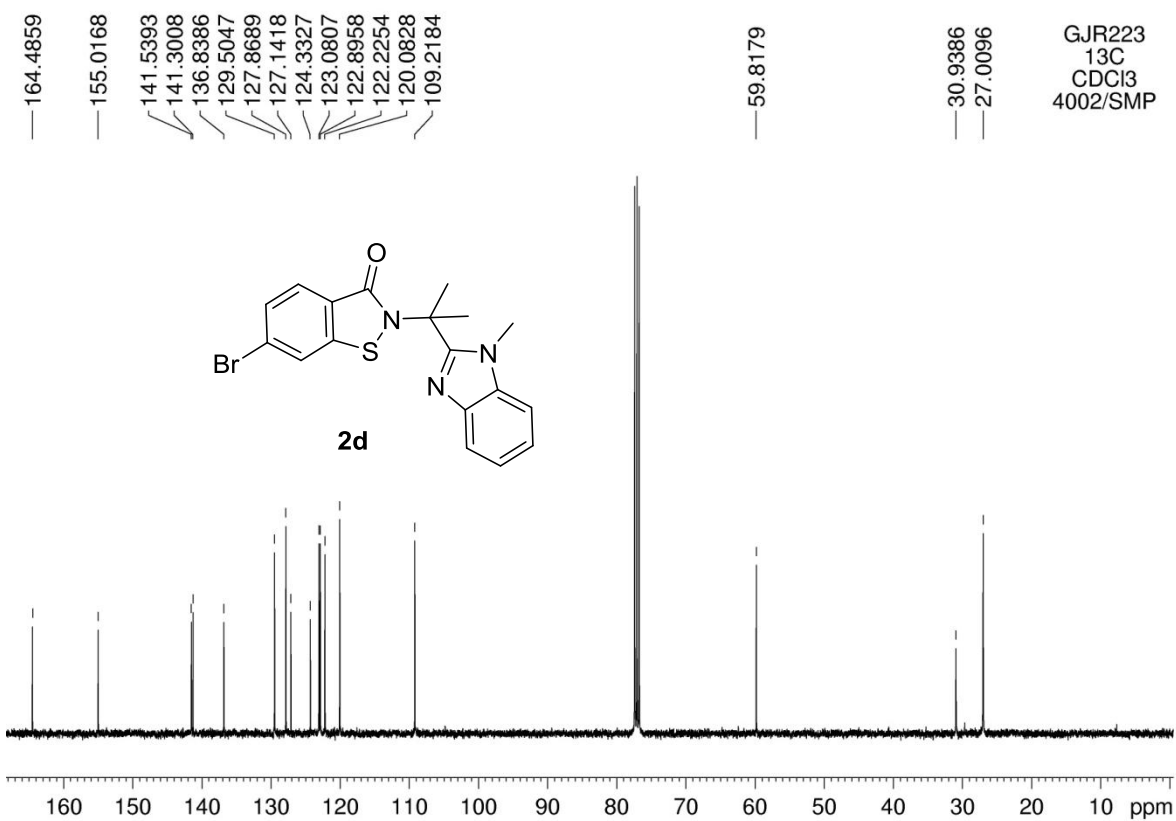

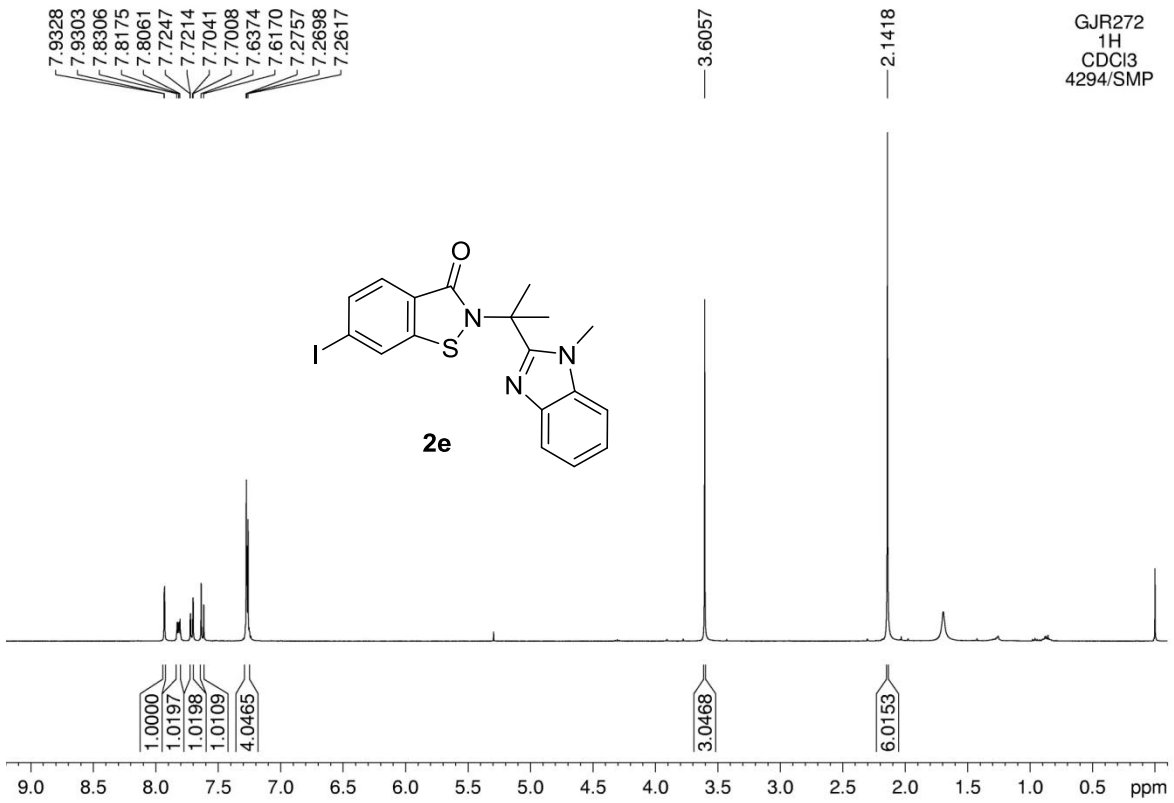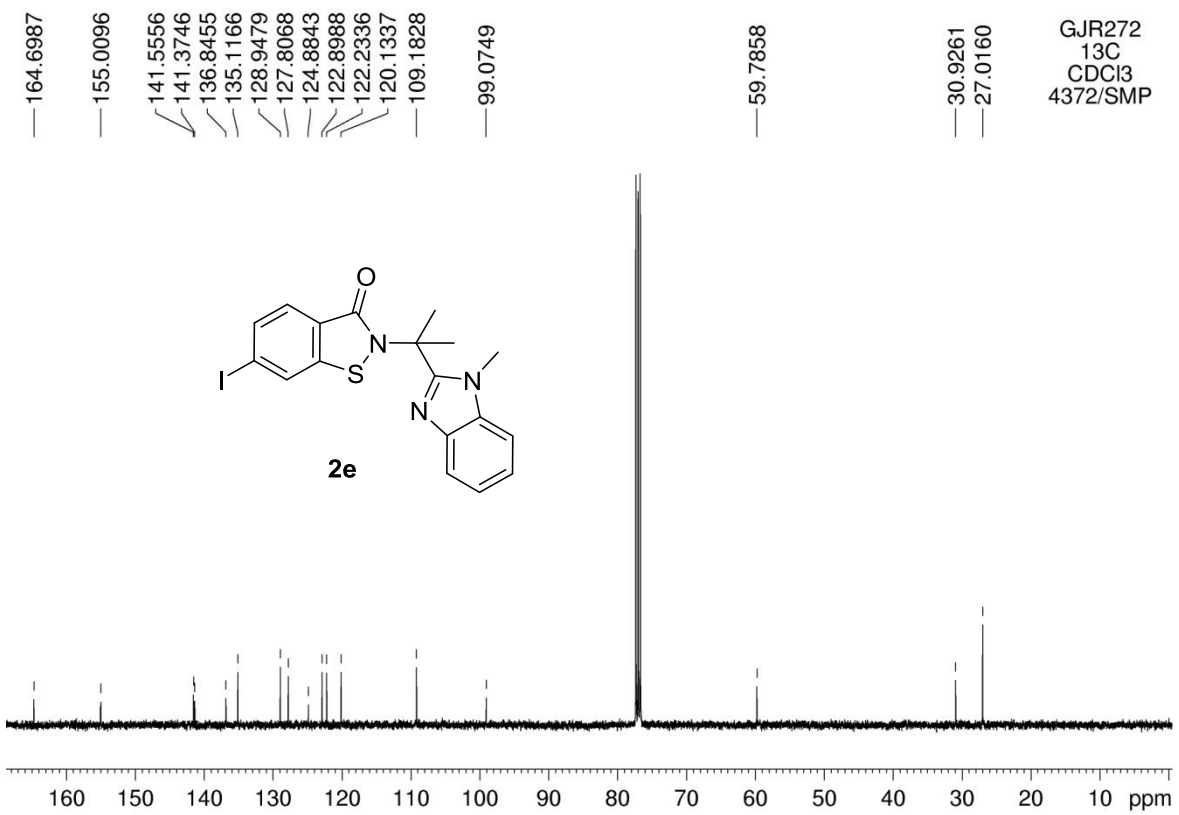

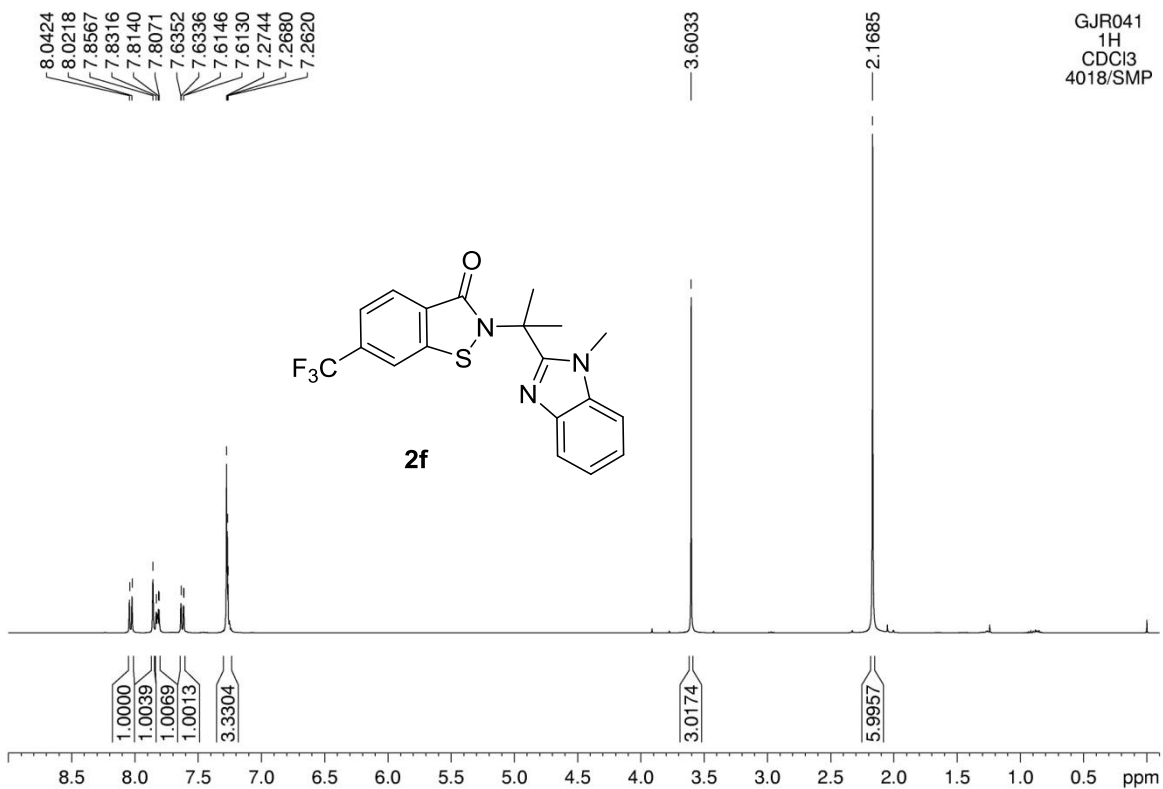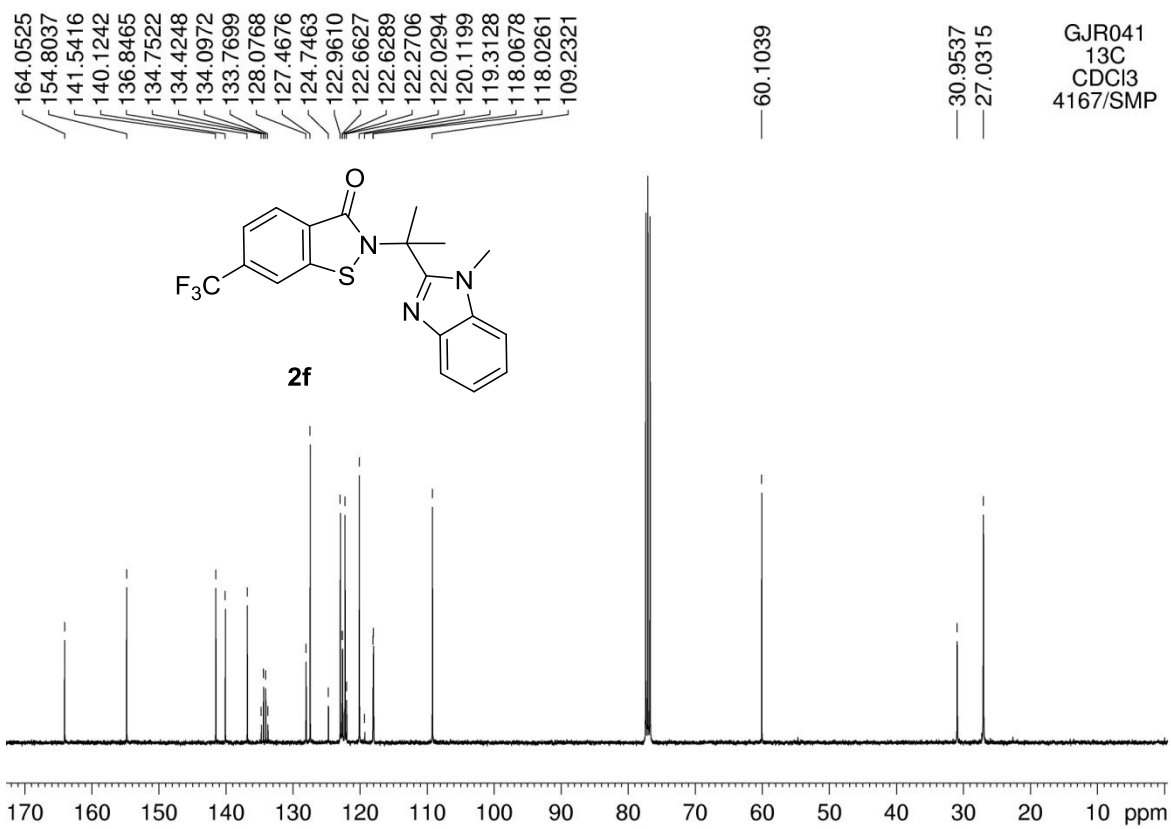

GJR041  
19F  
CDCl3  
4019/SMP

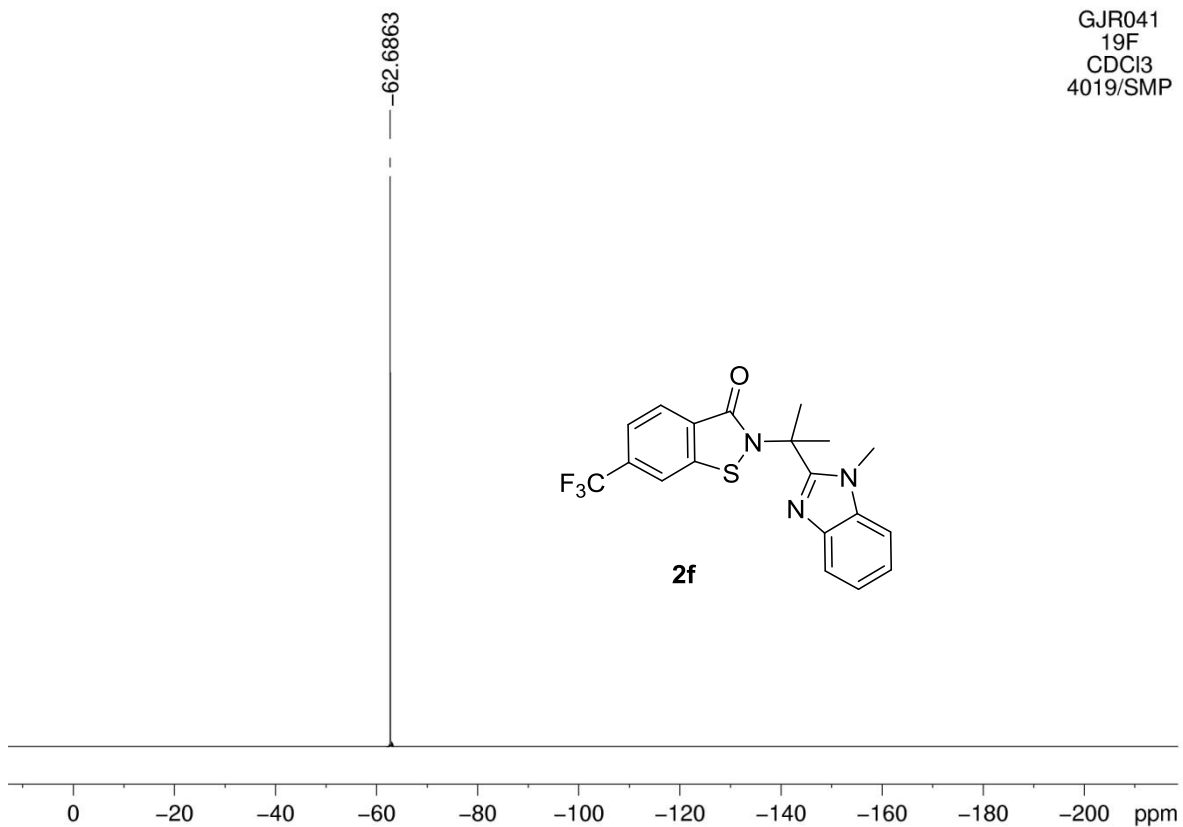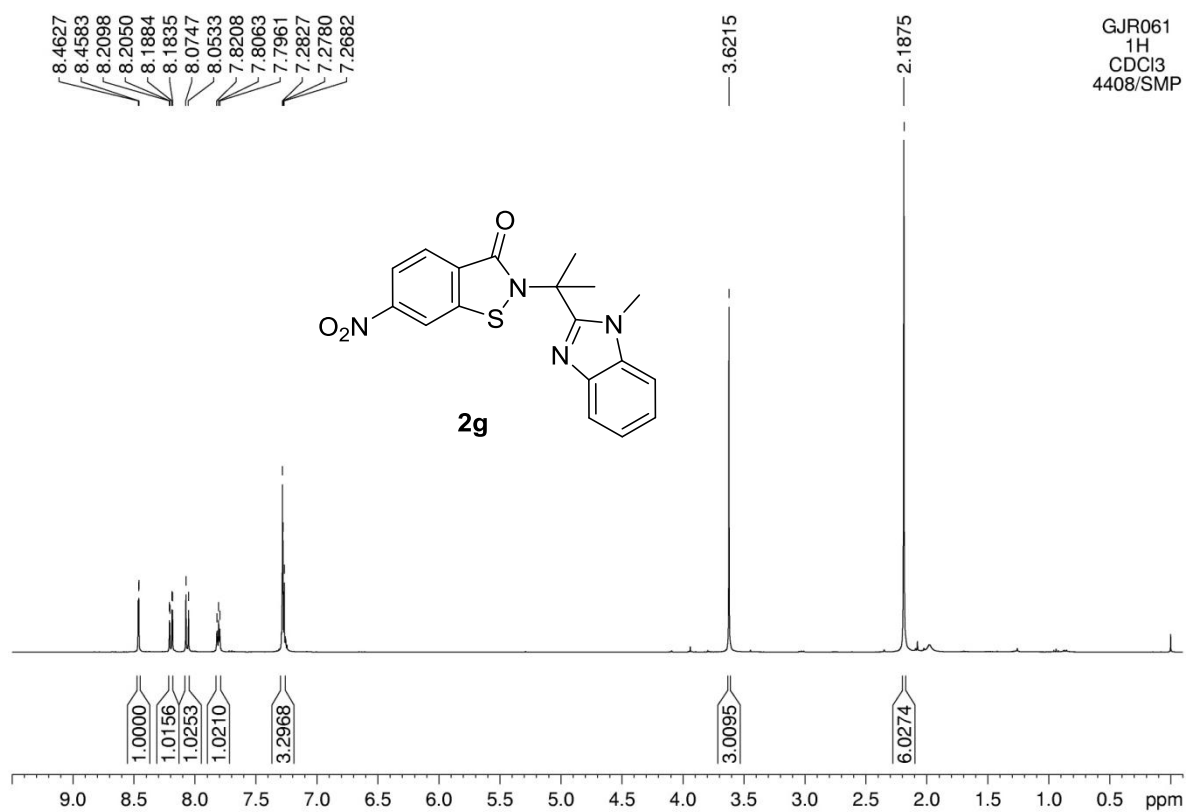

GJR061  
1H  
CDCl3  
4408/SMP

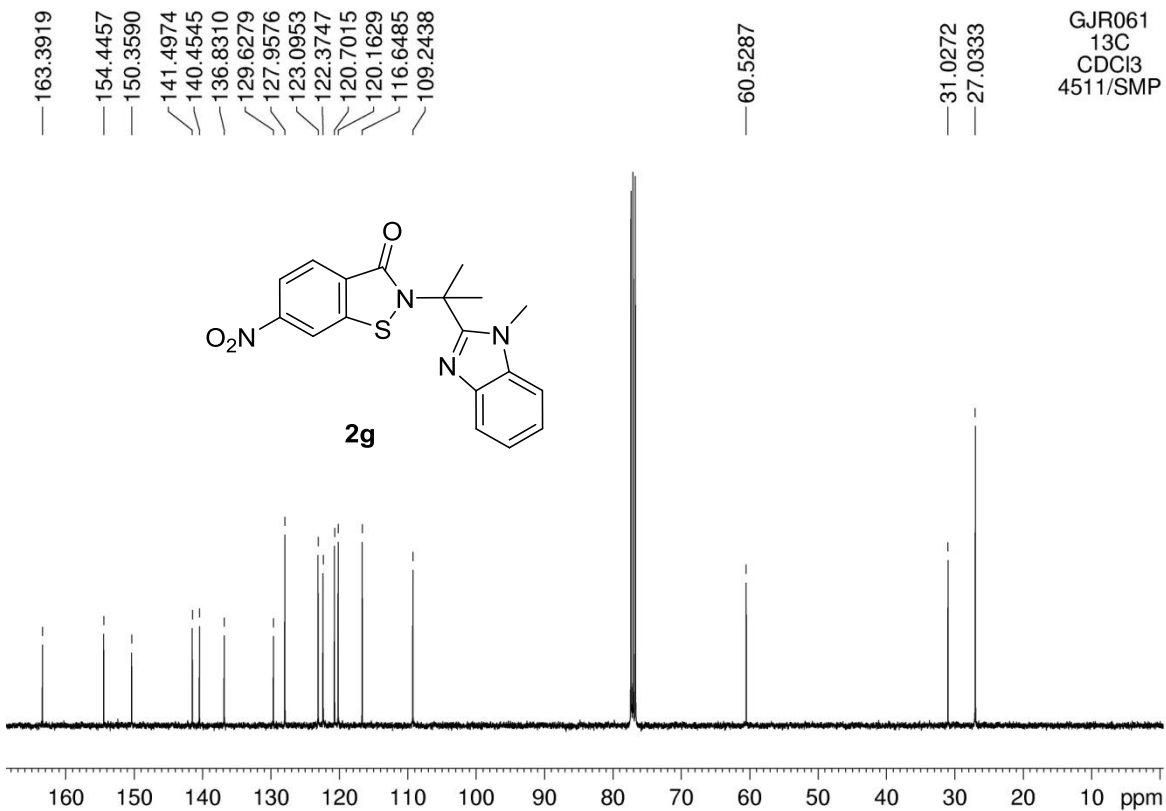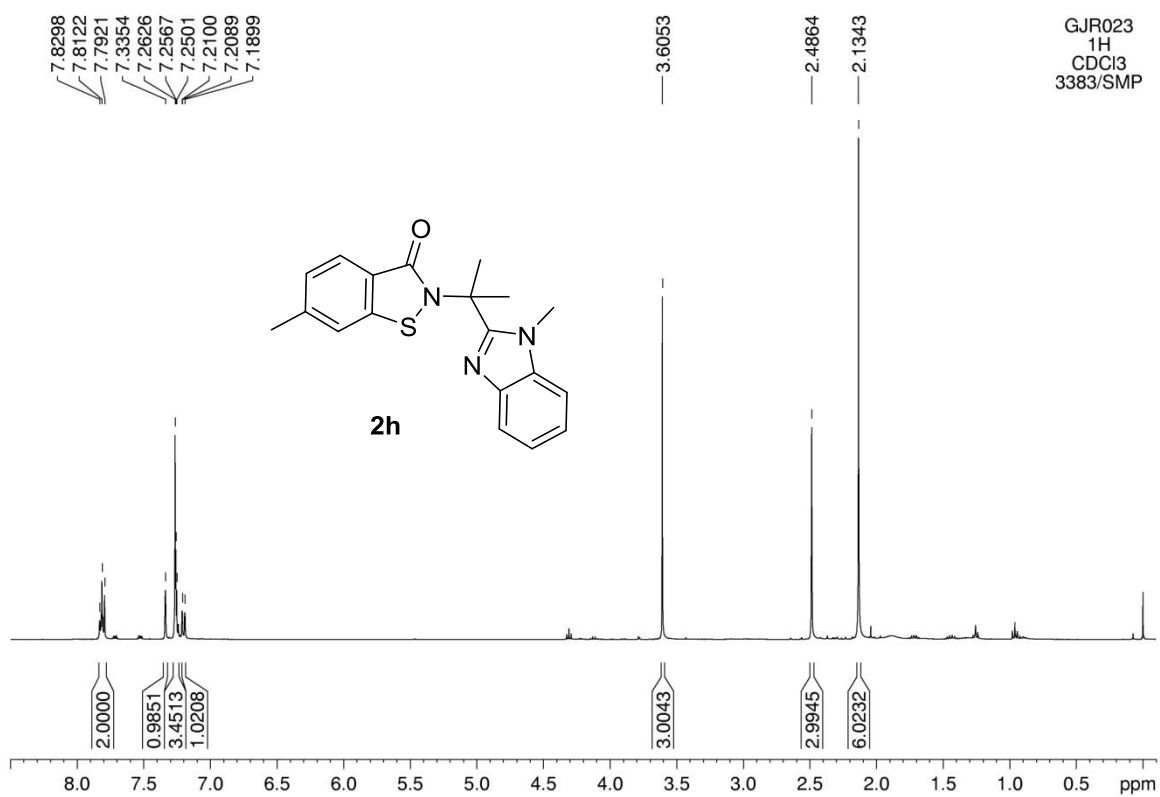

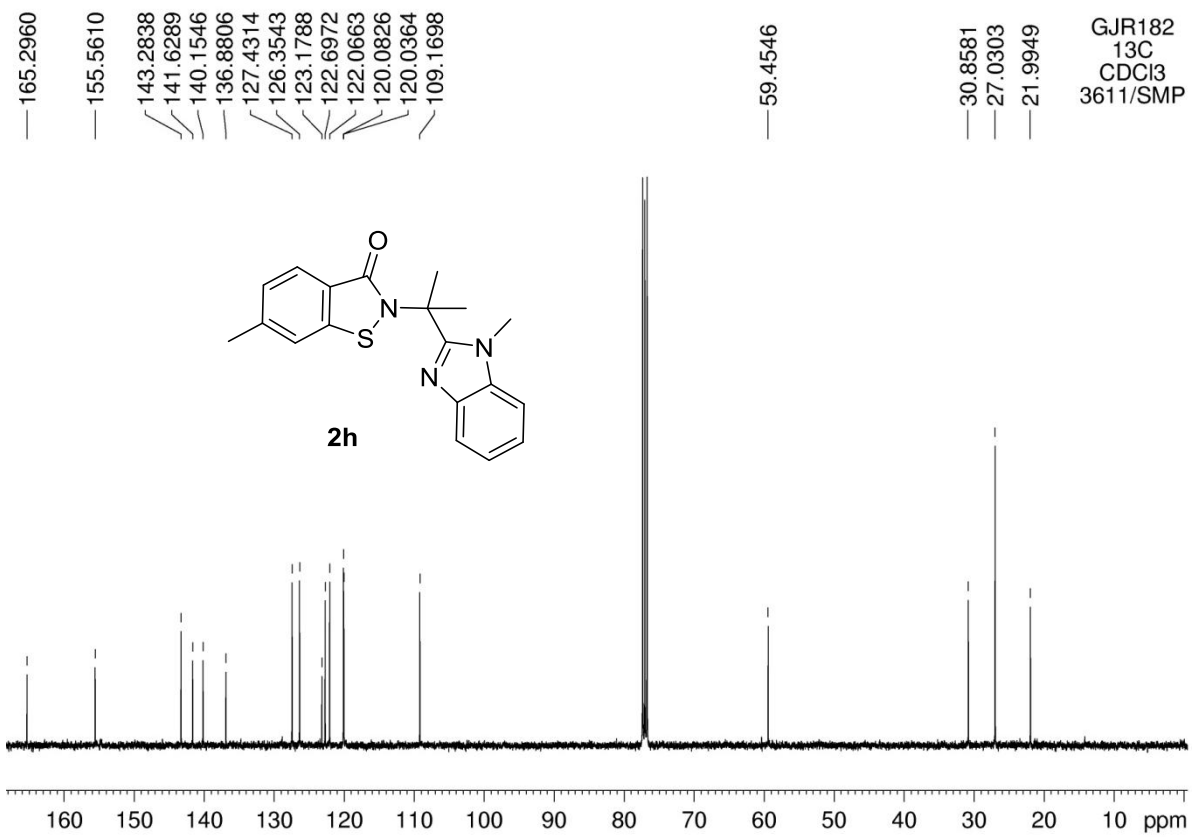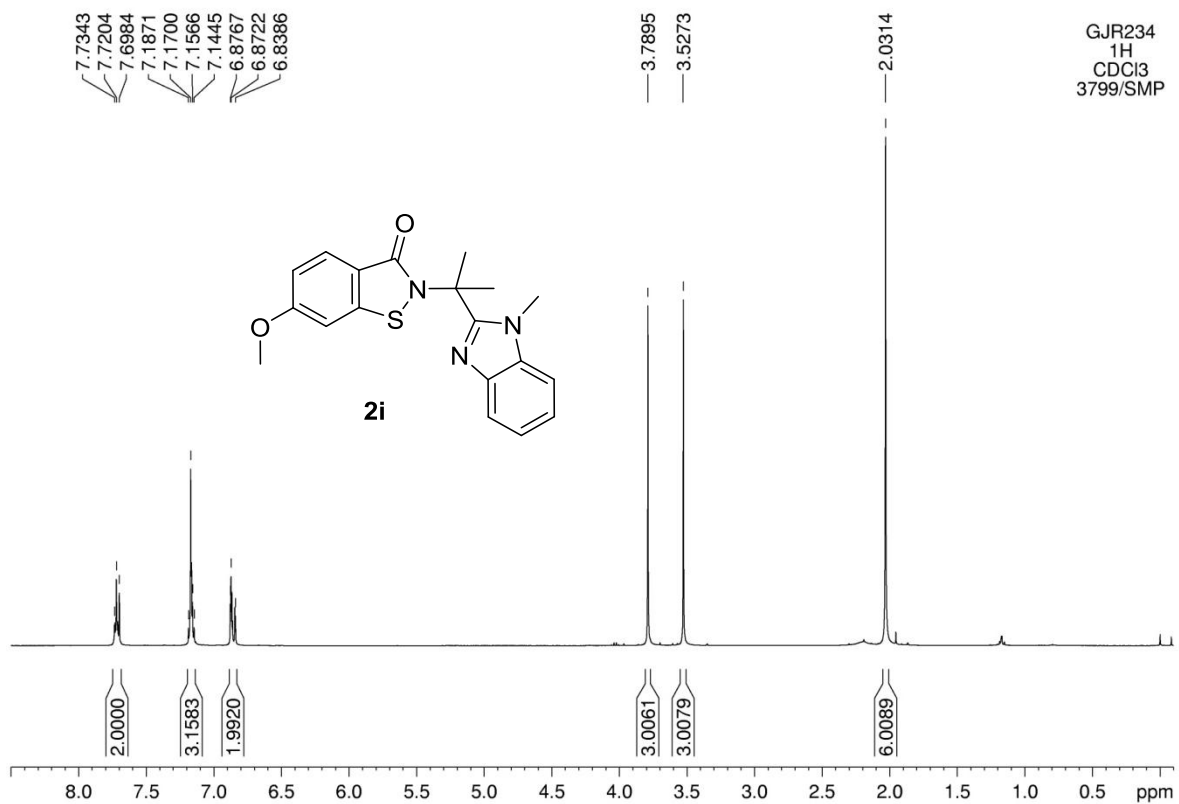



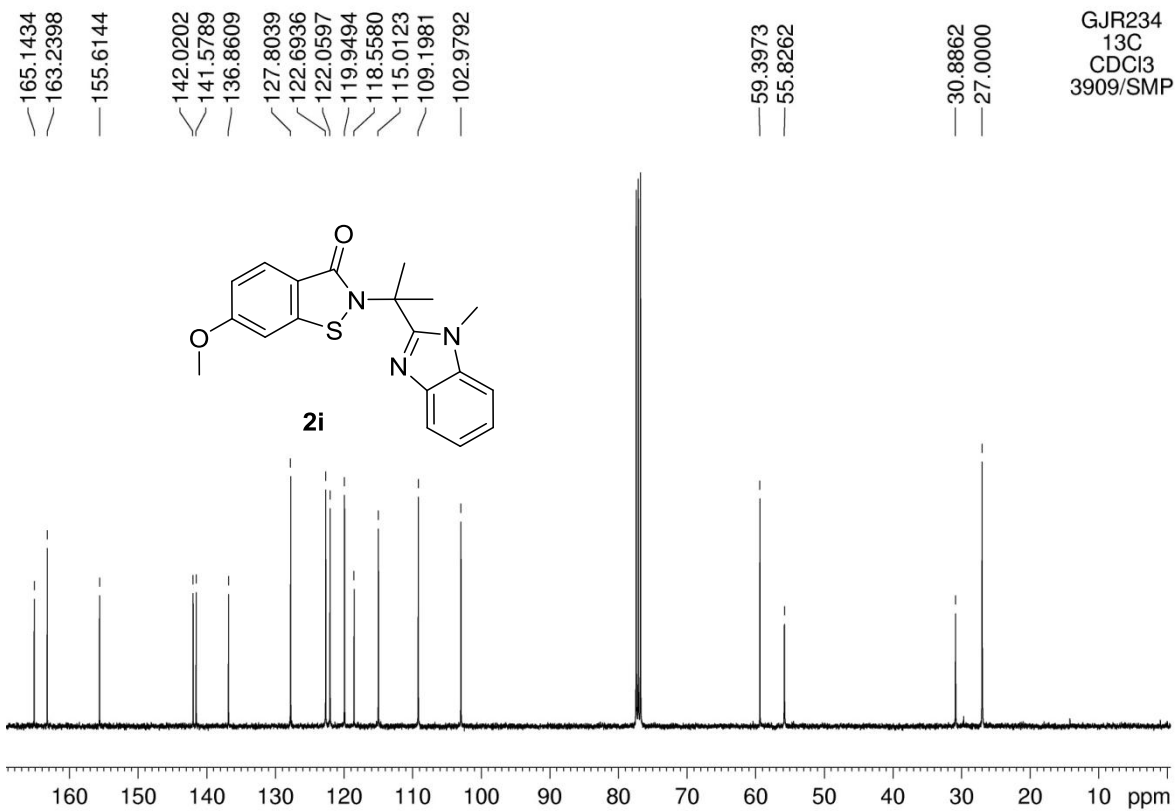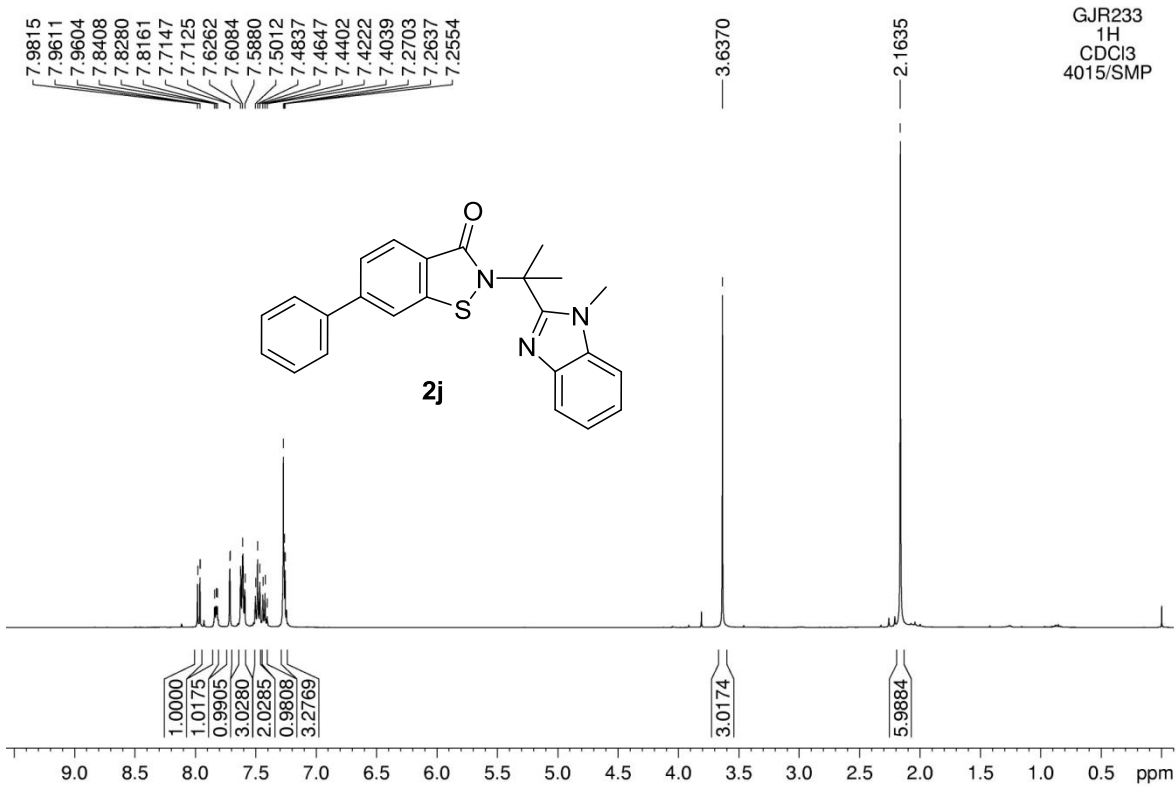

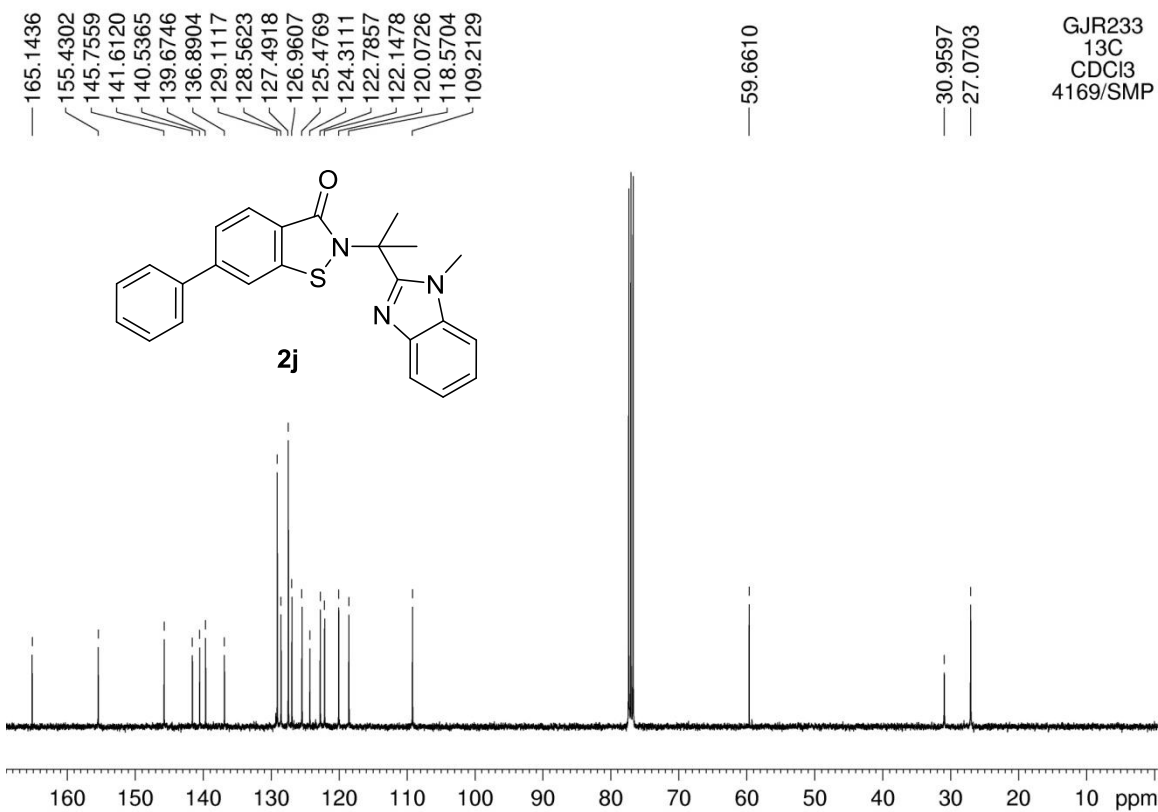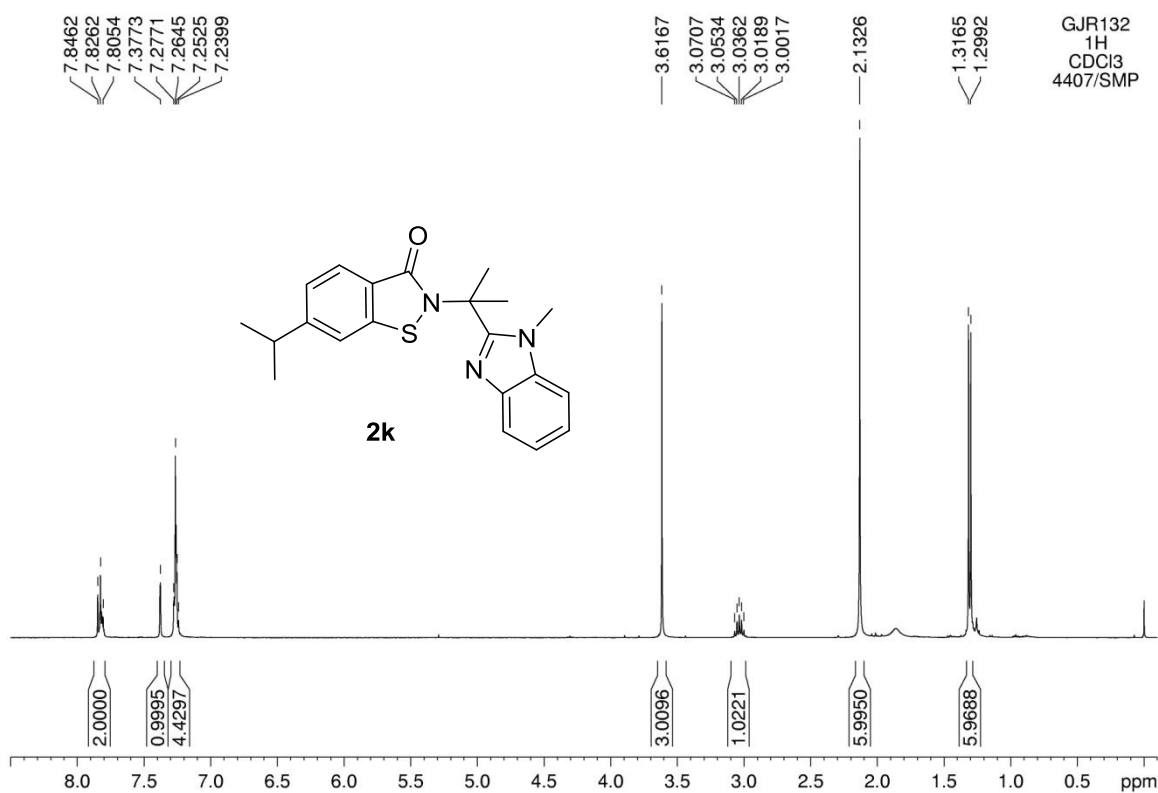

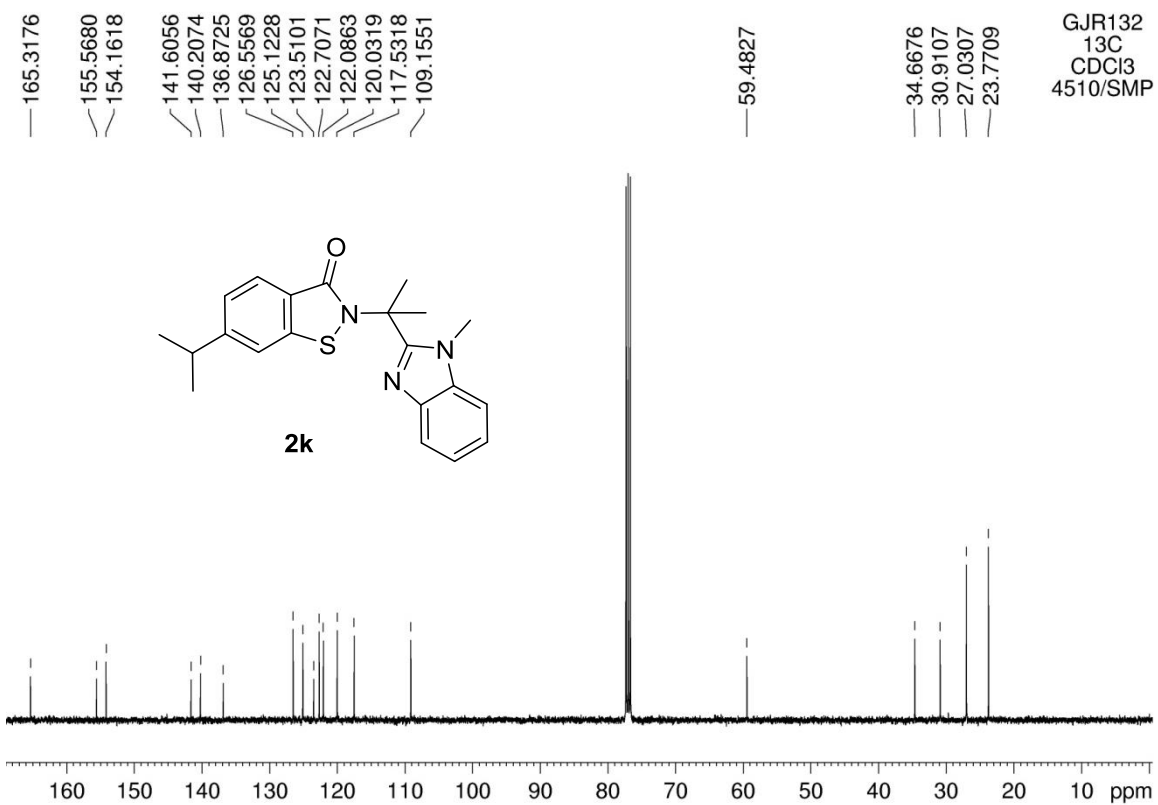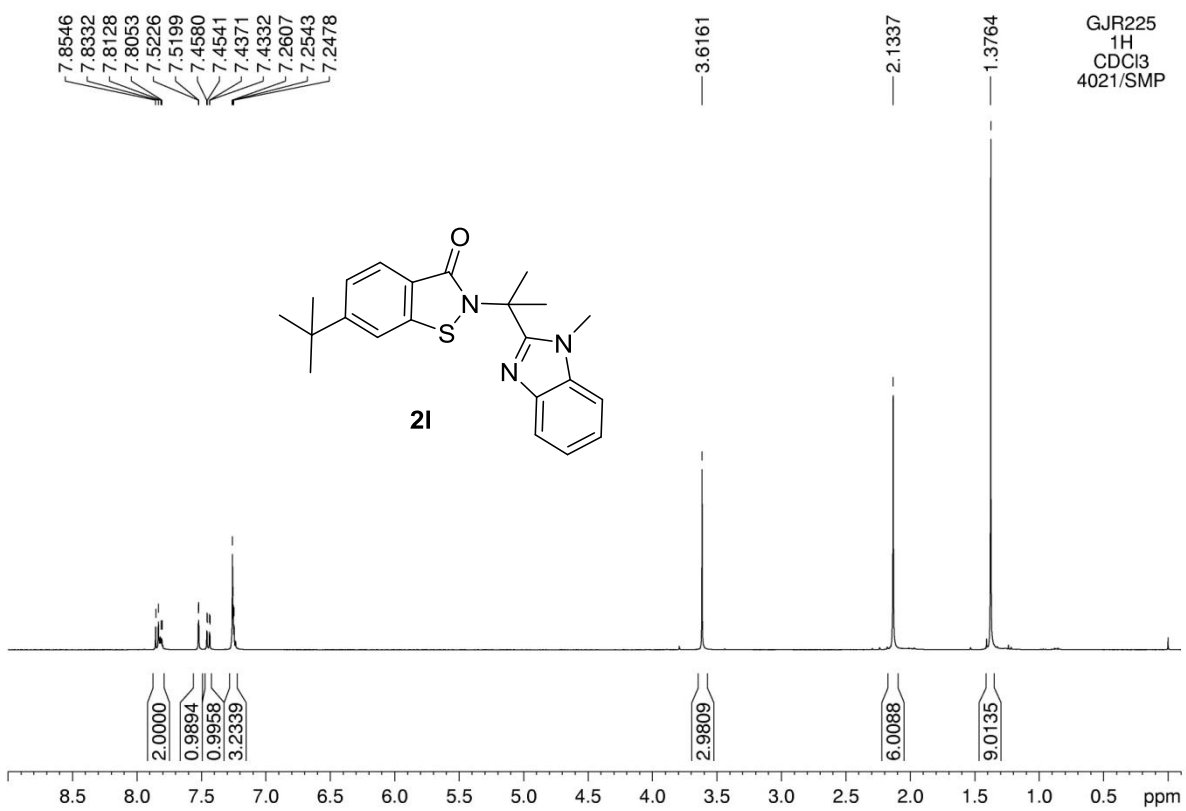

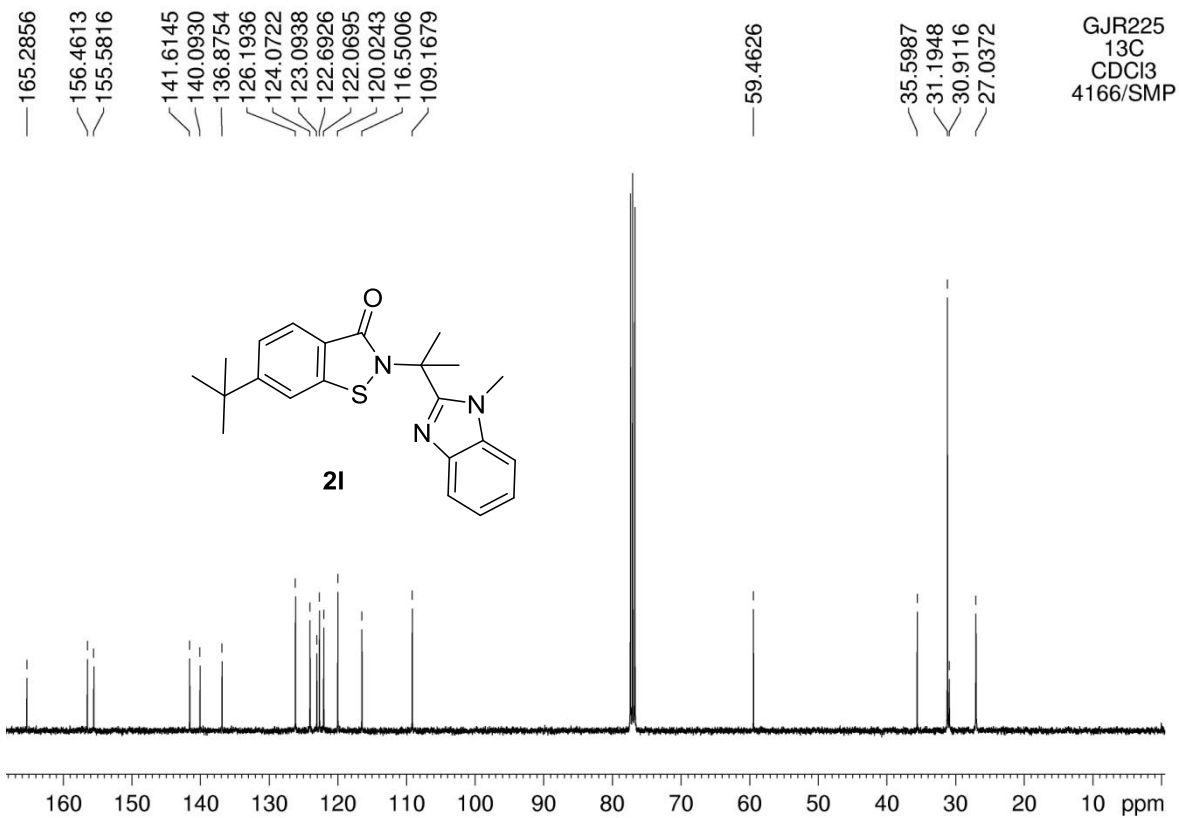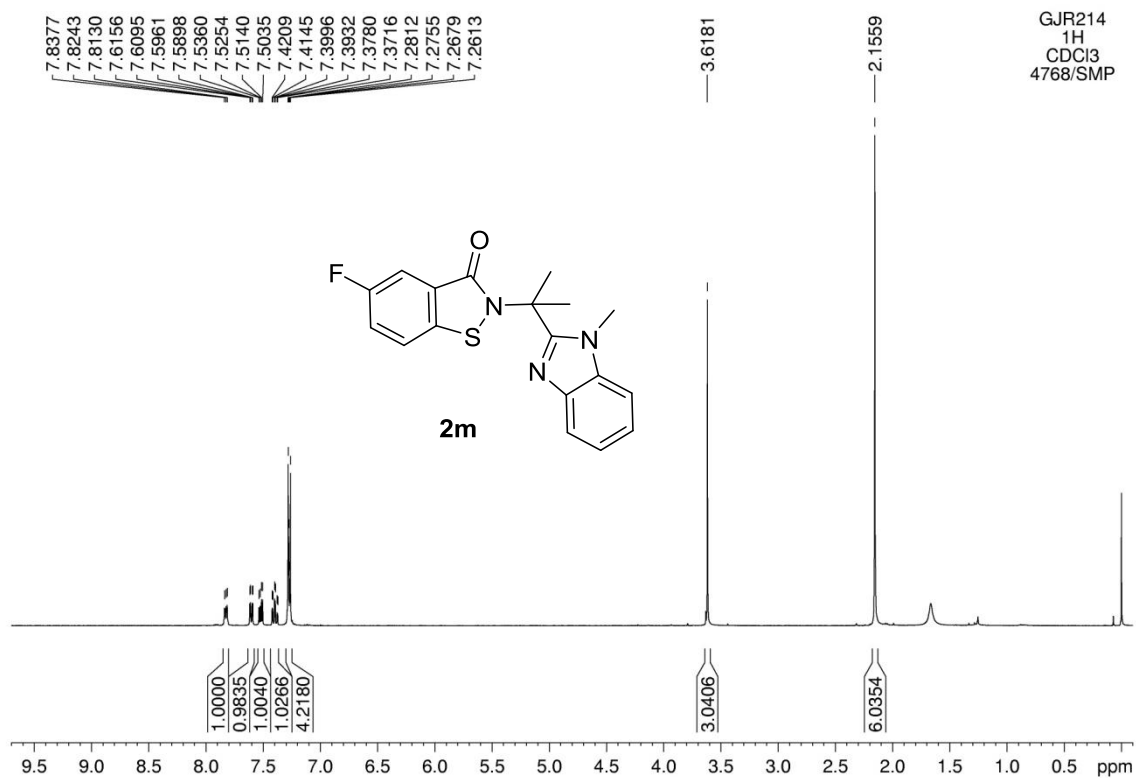

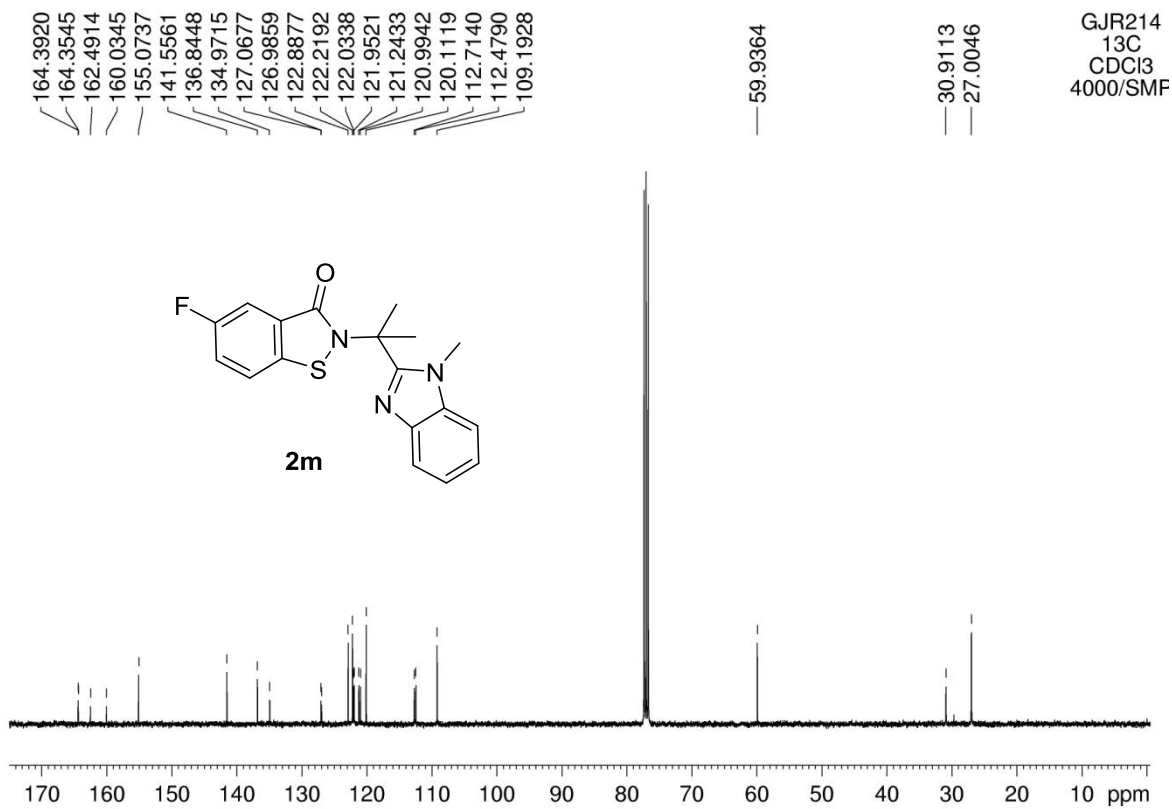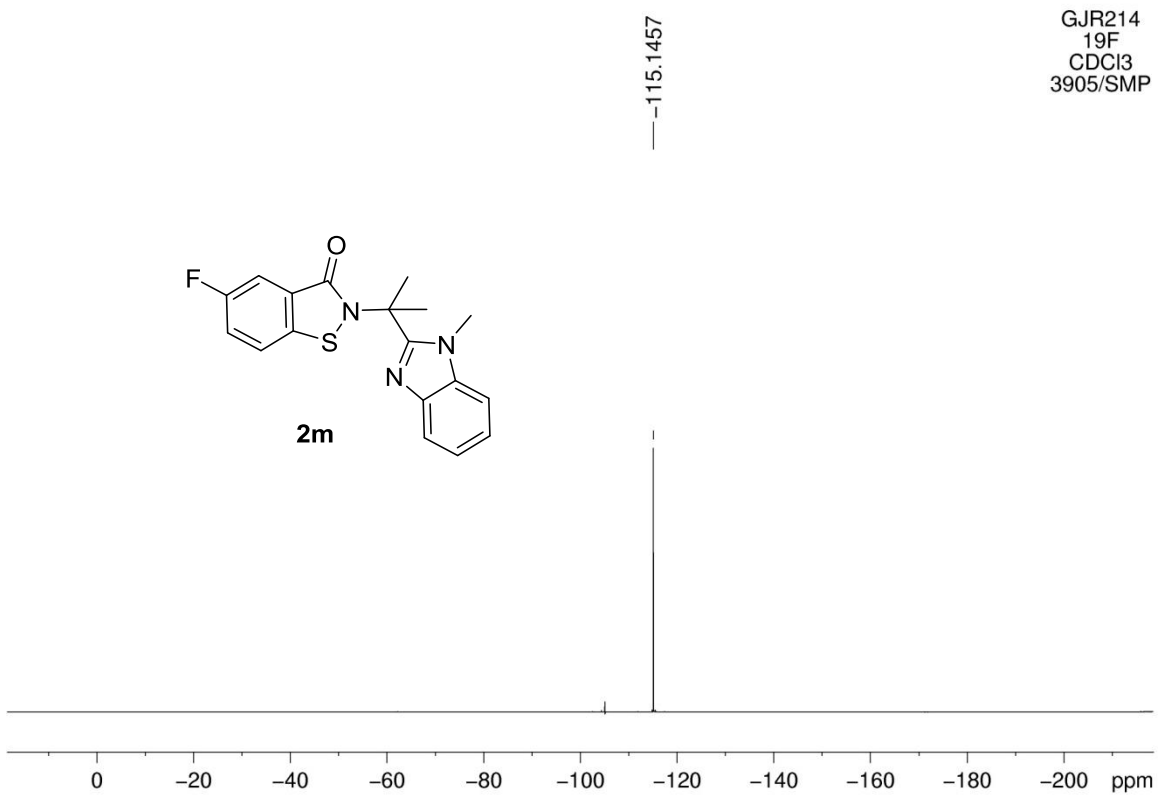

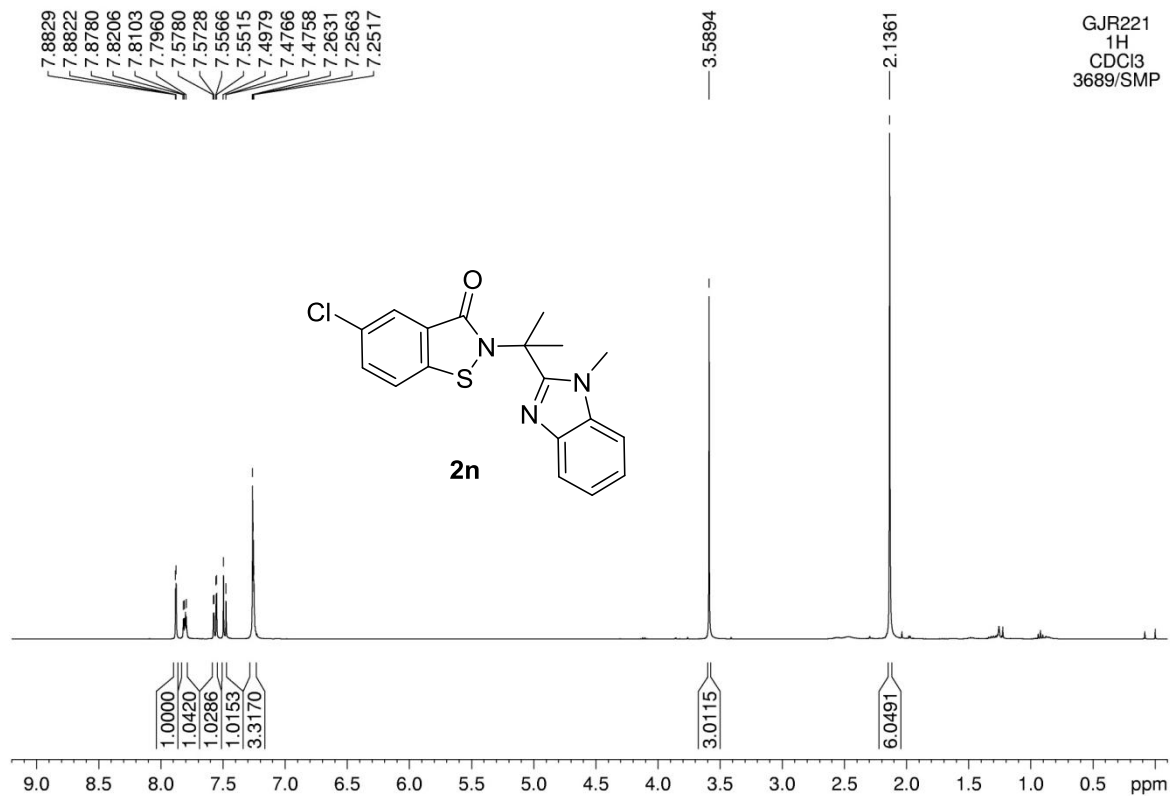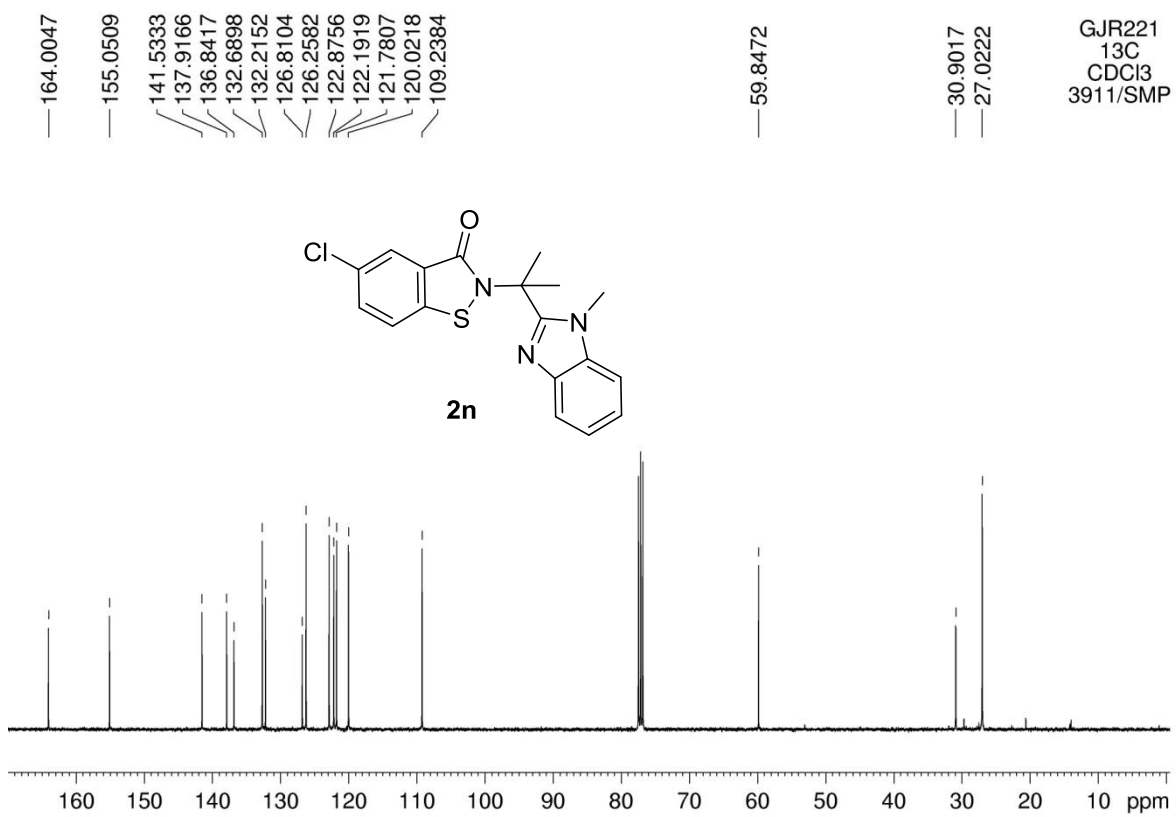

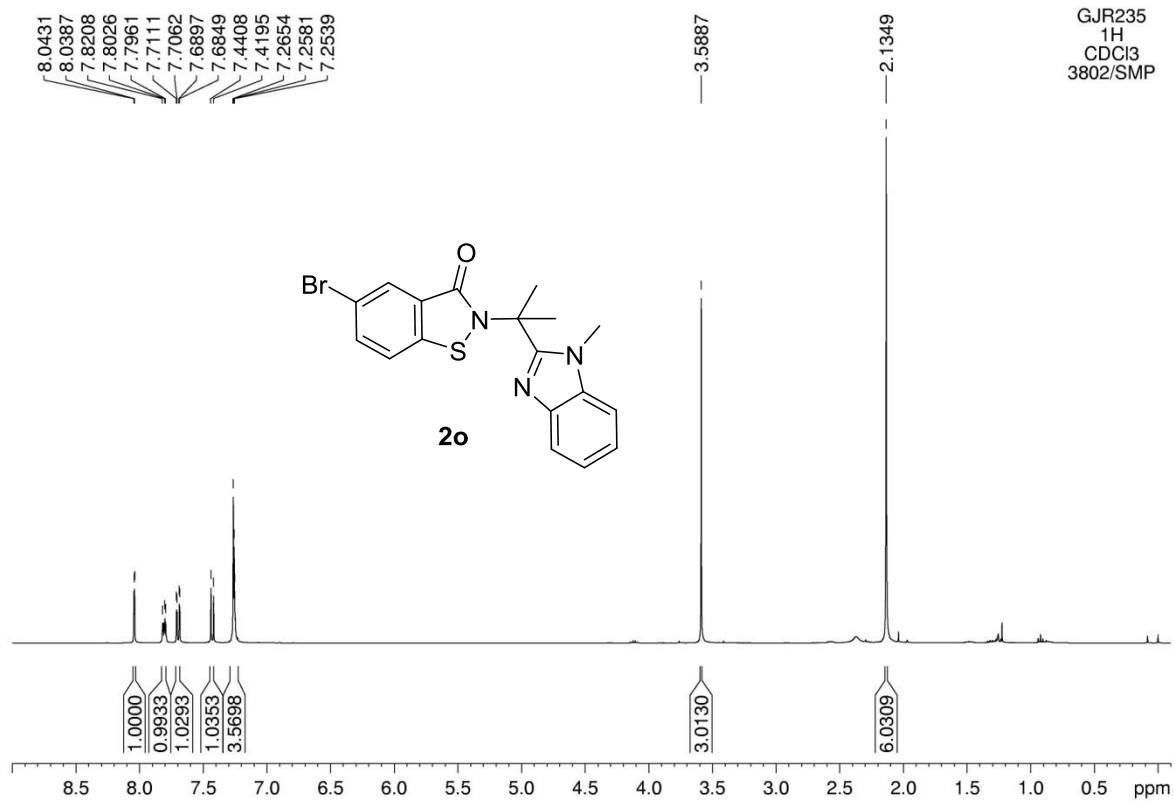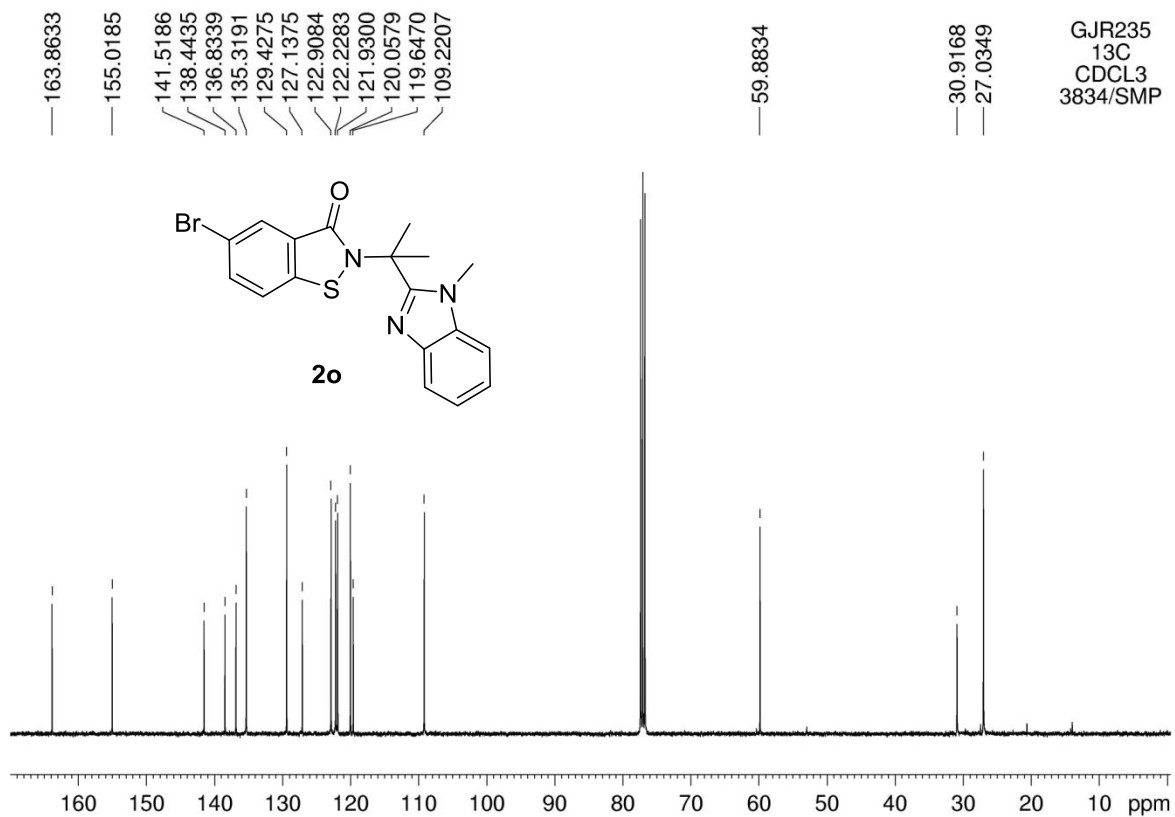

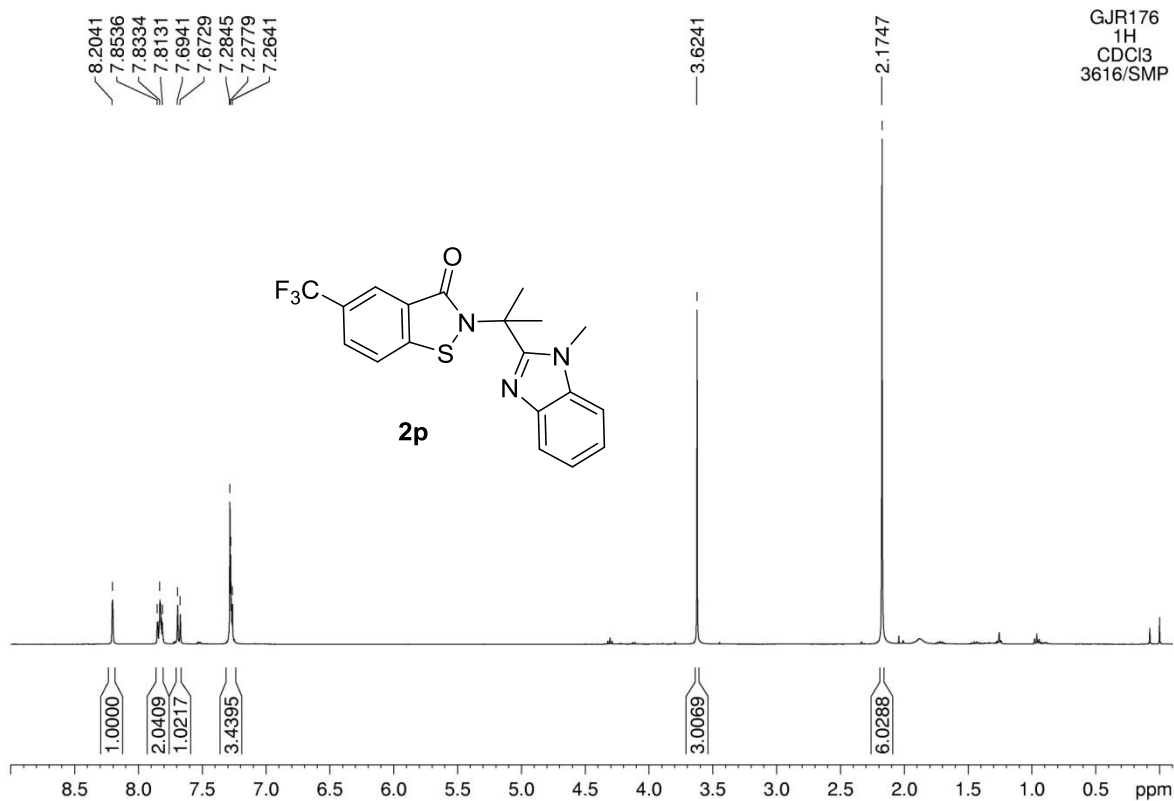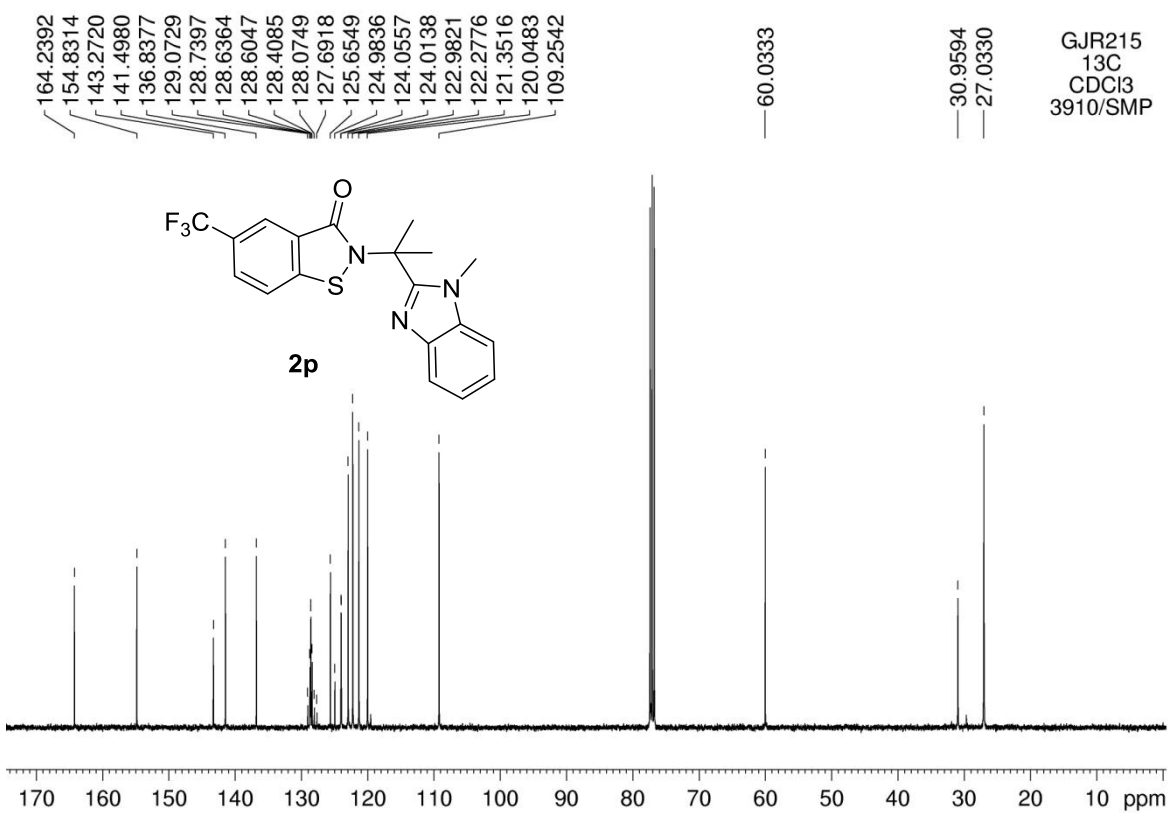



GJR176  
19F  
CDCl3  
3698/SMP

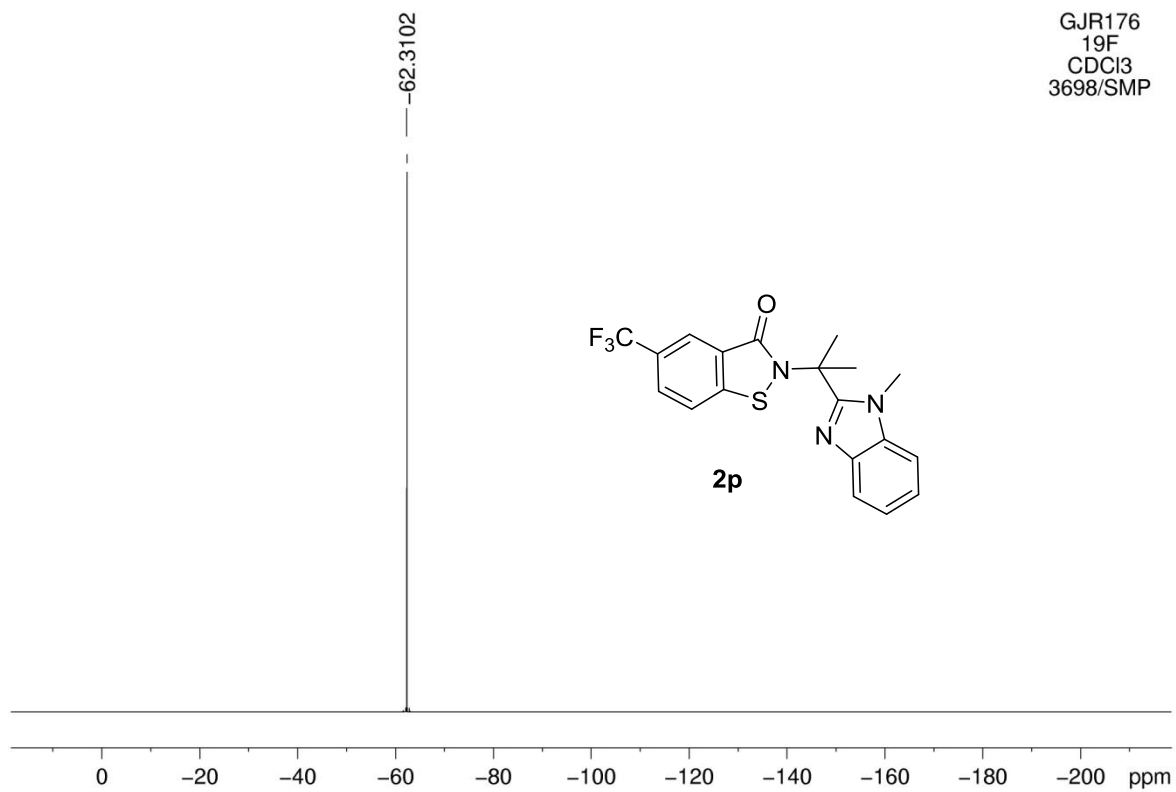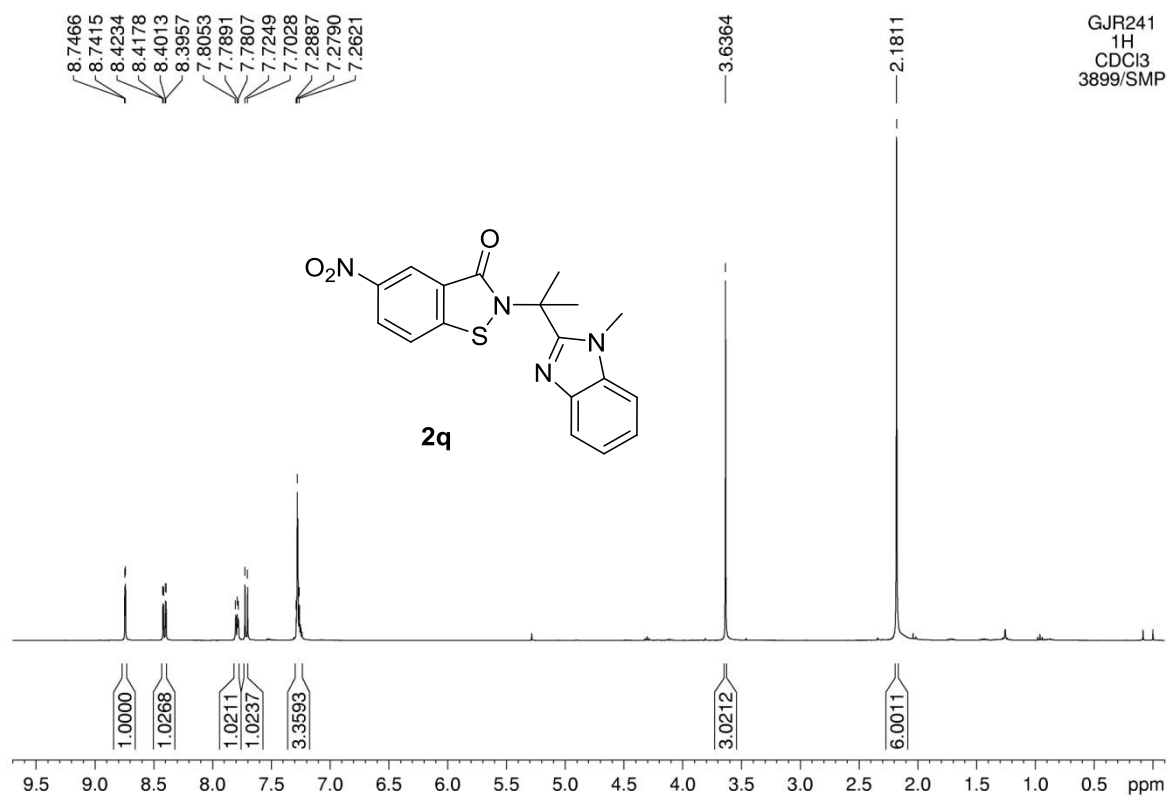

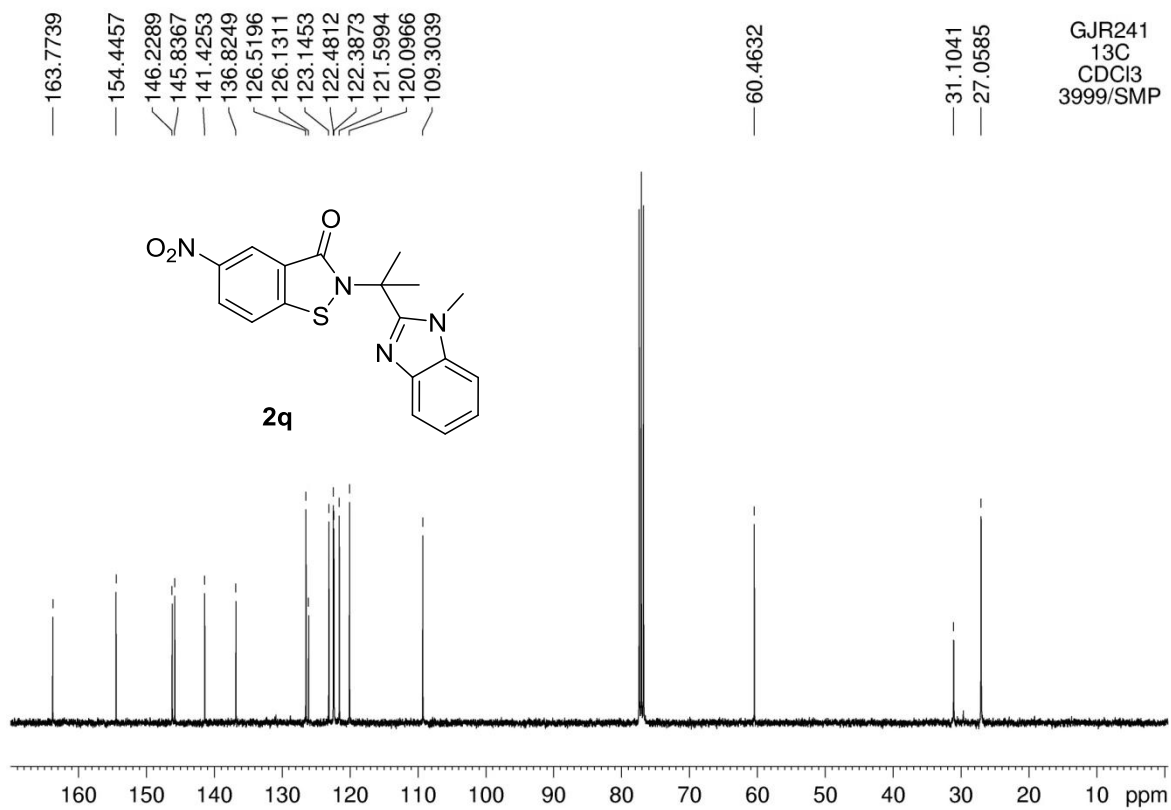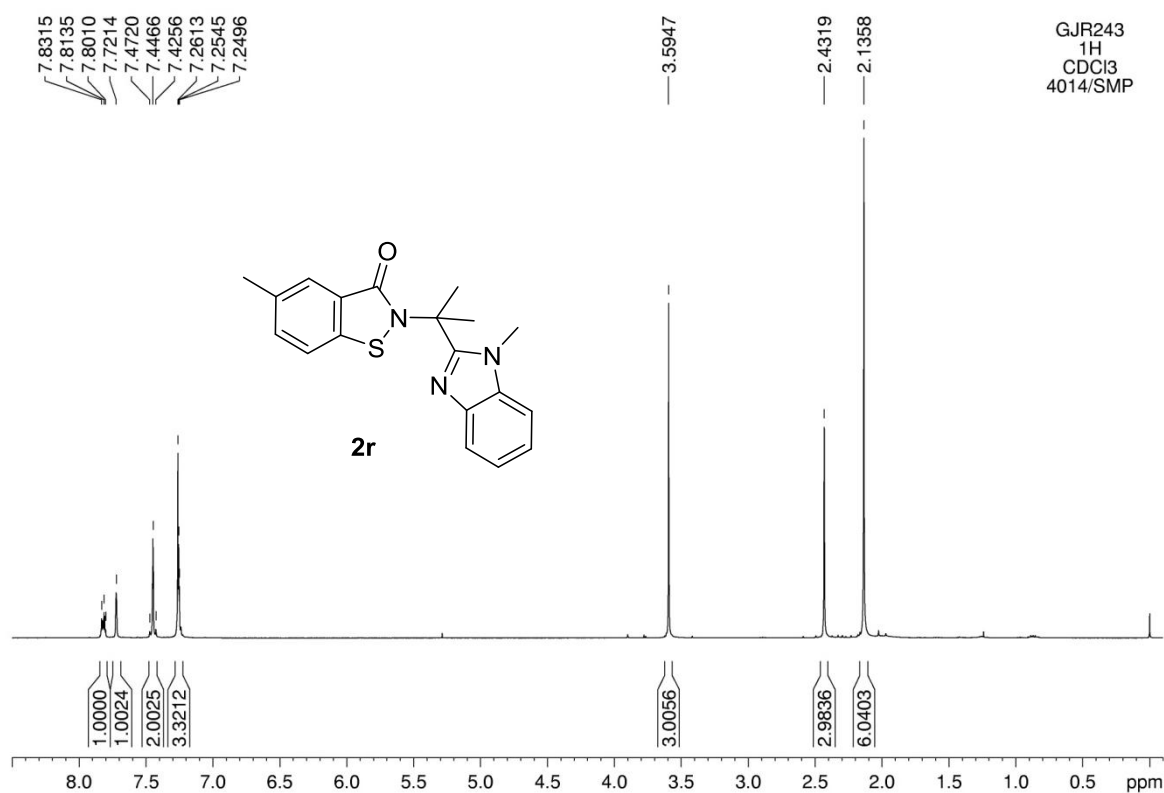

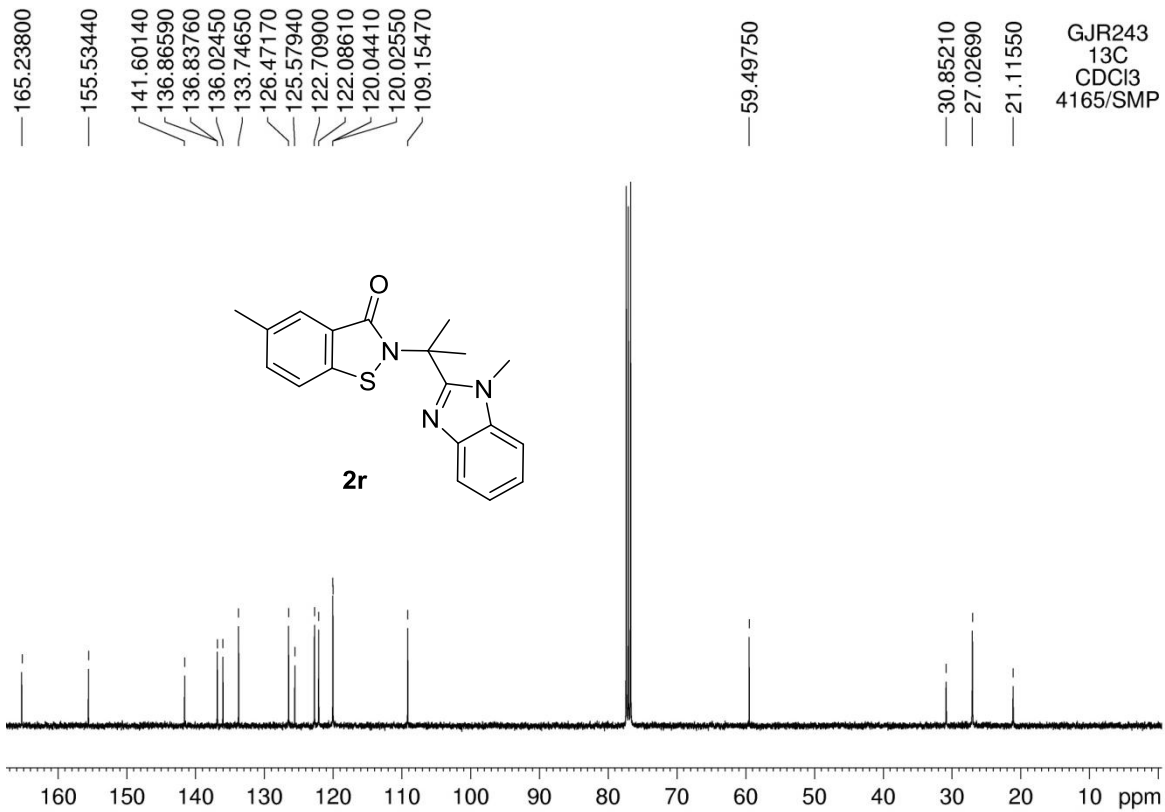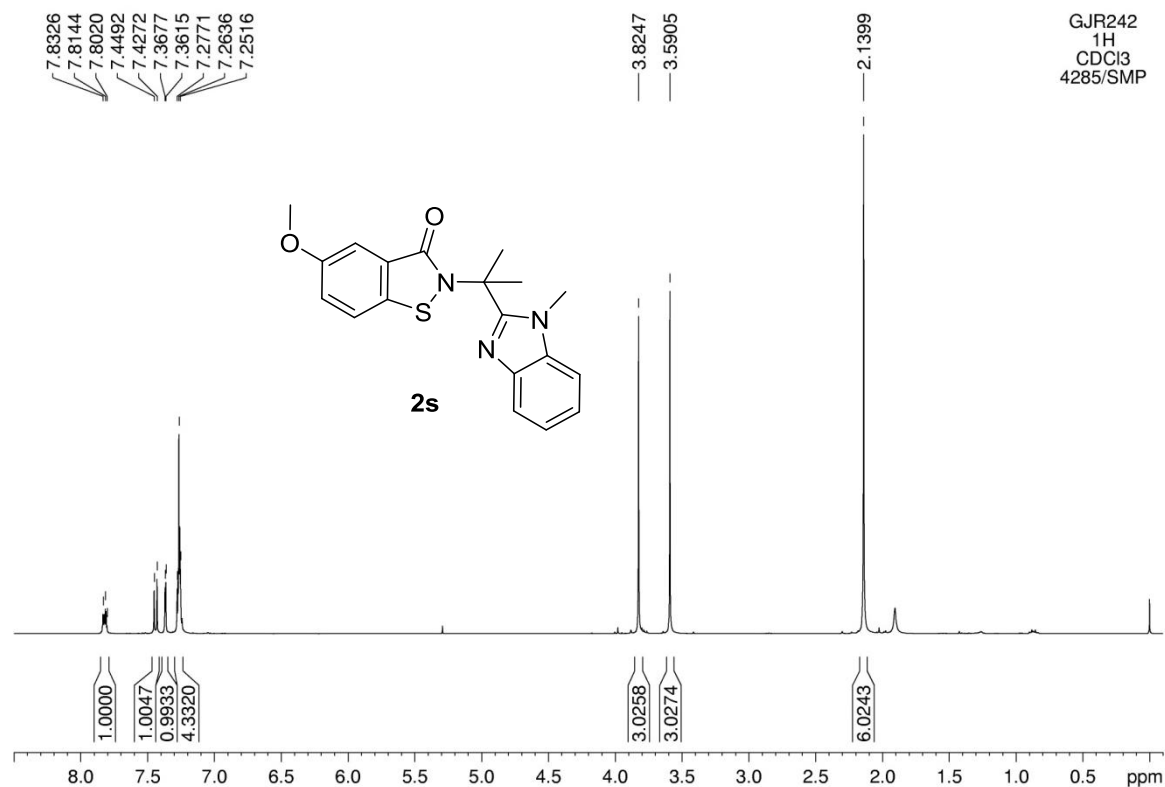

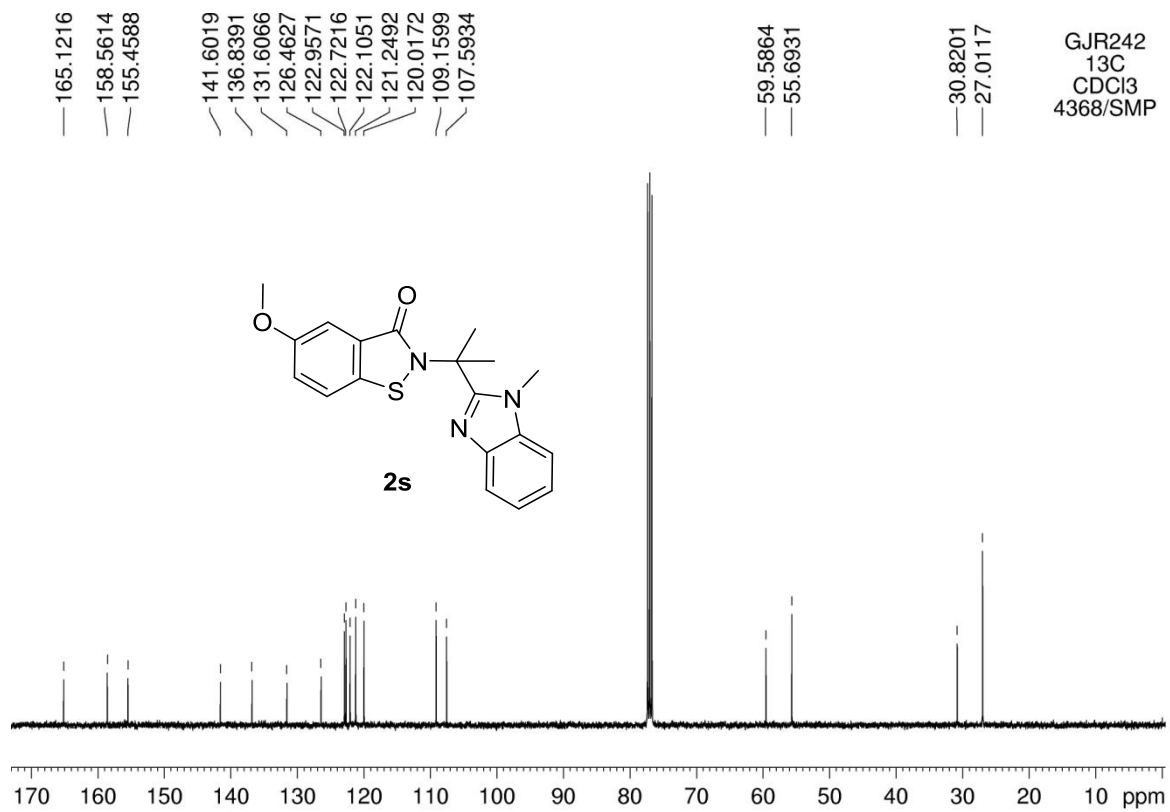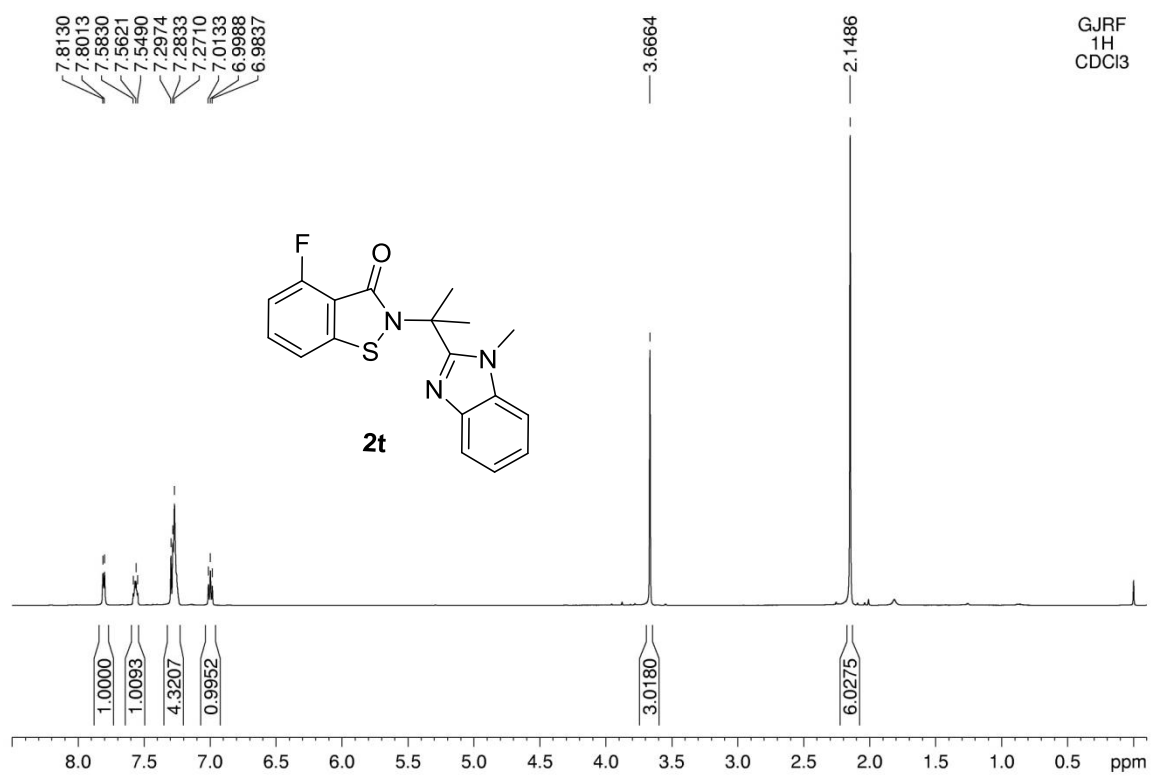

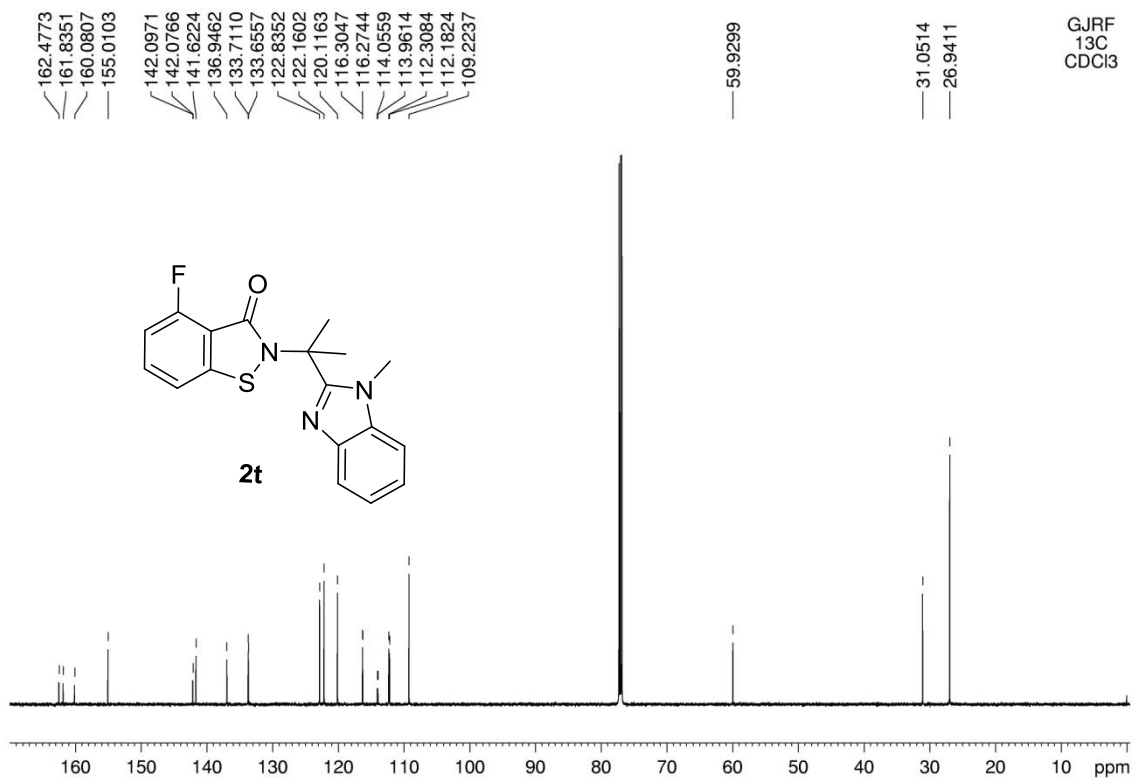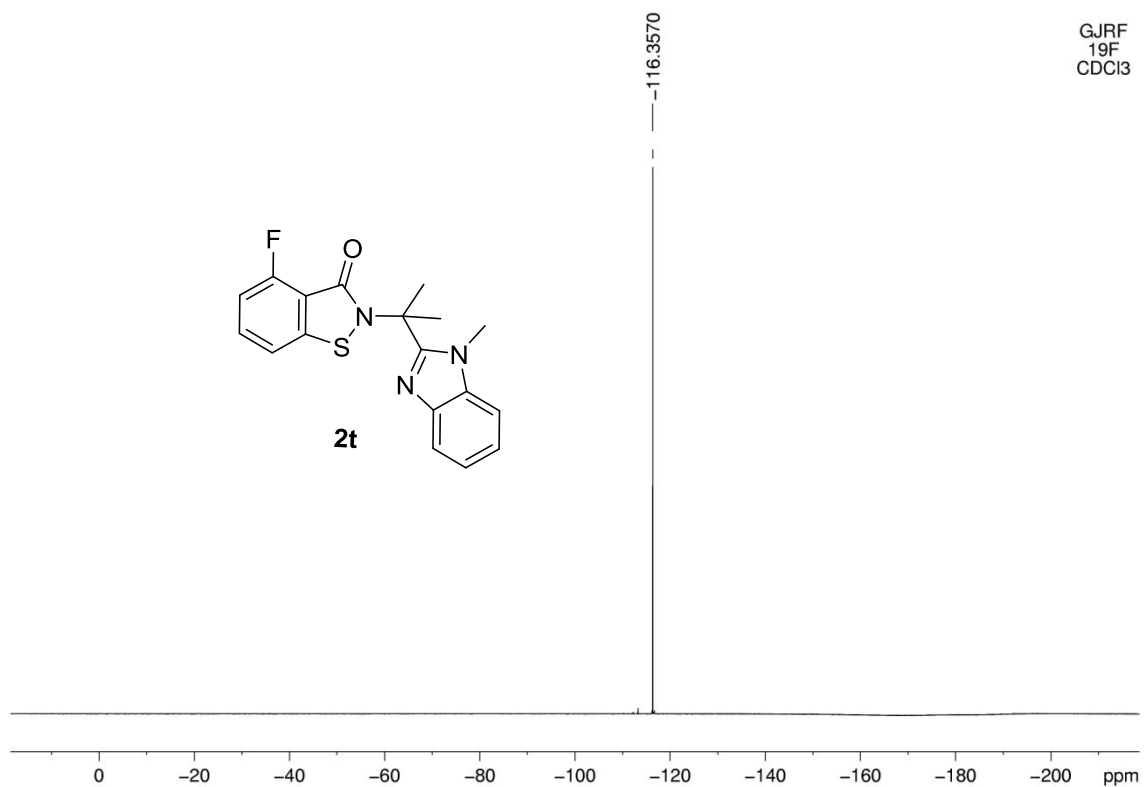

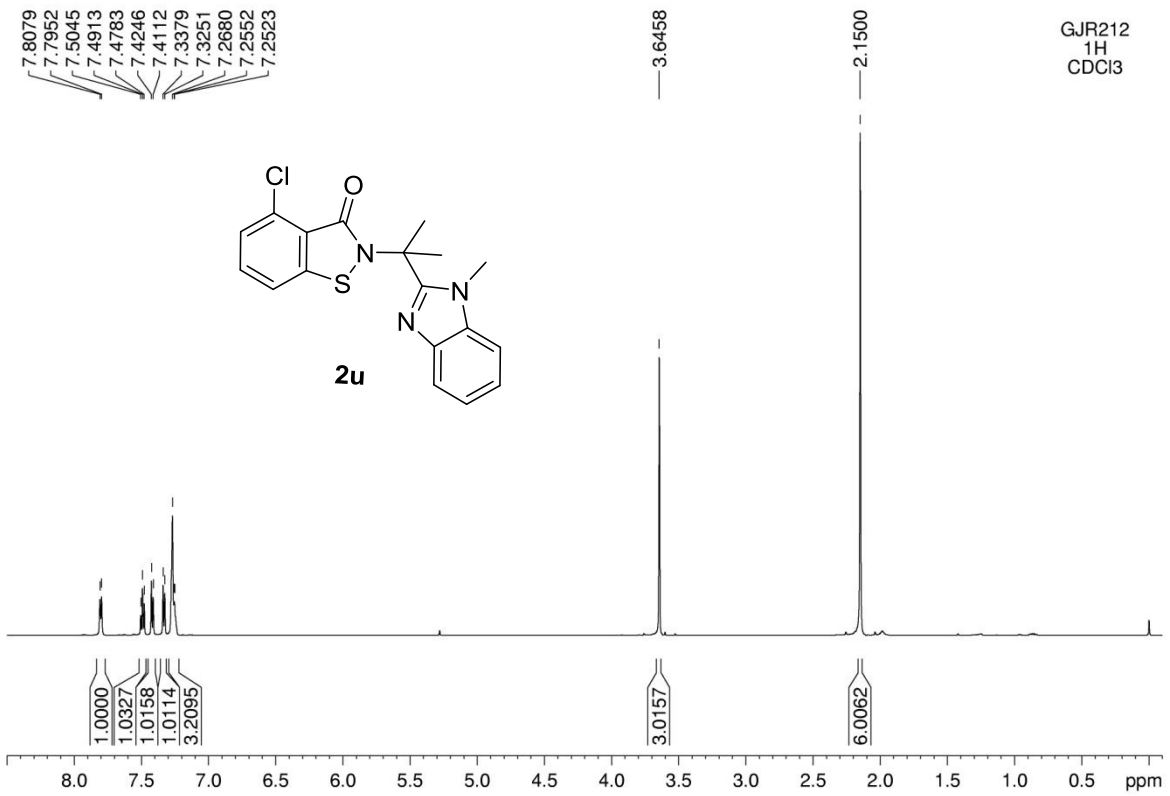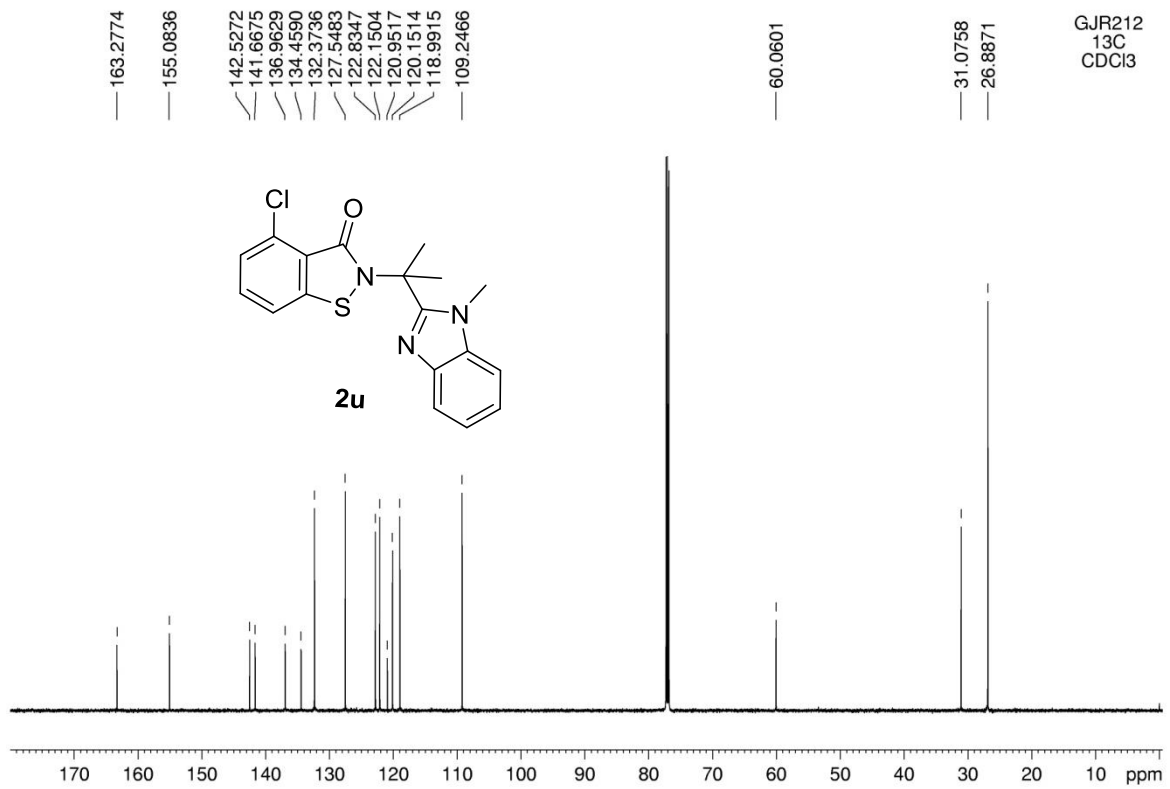

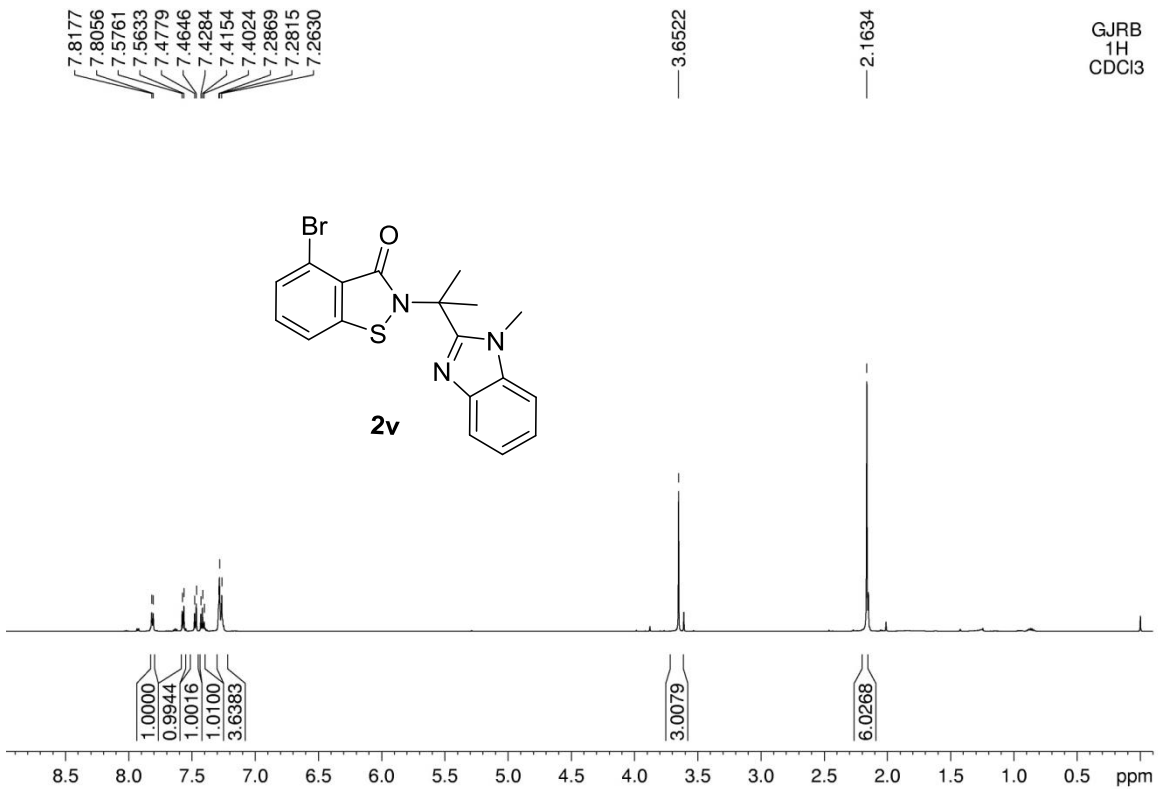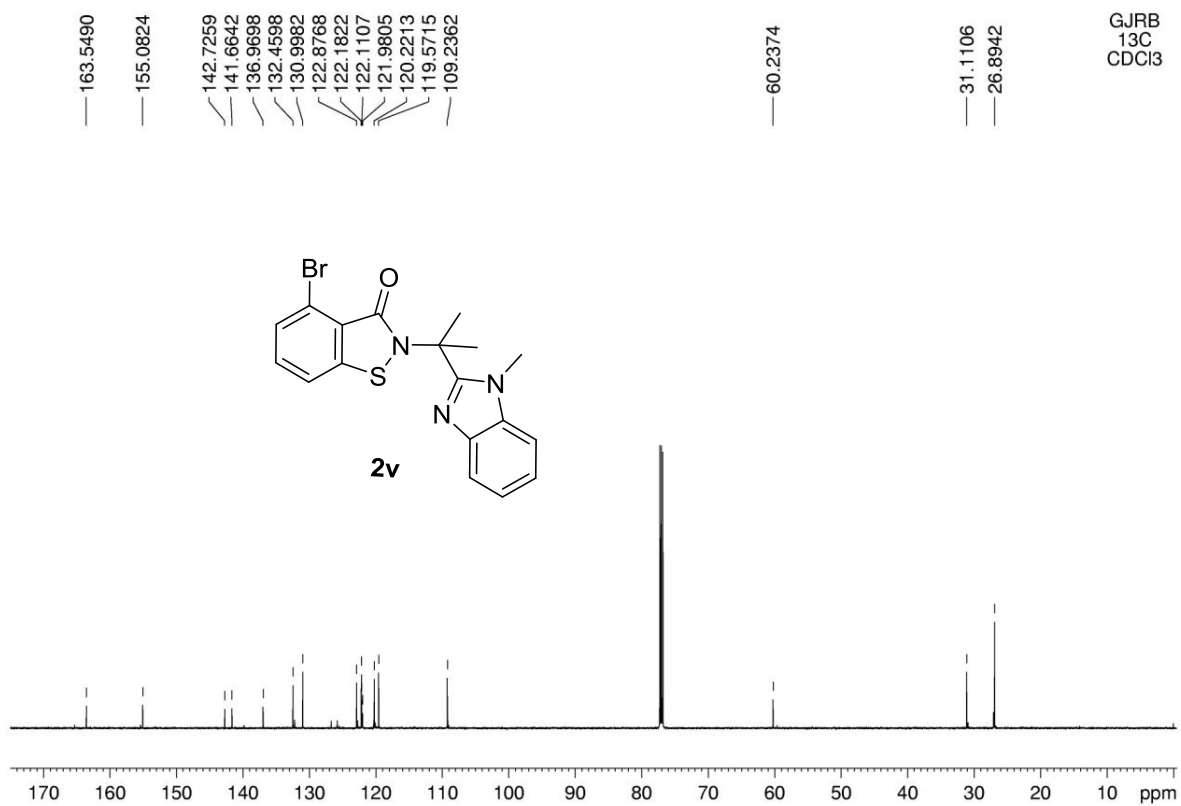

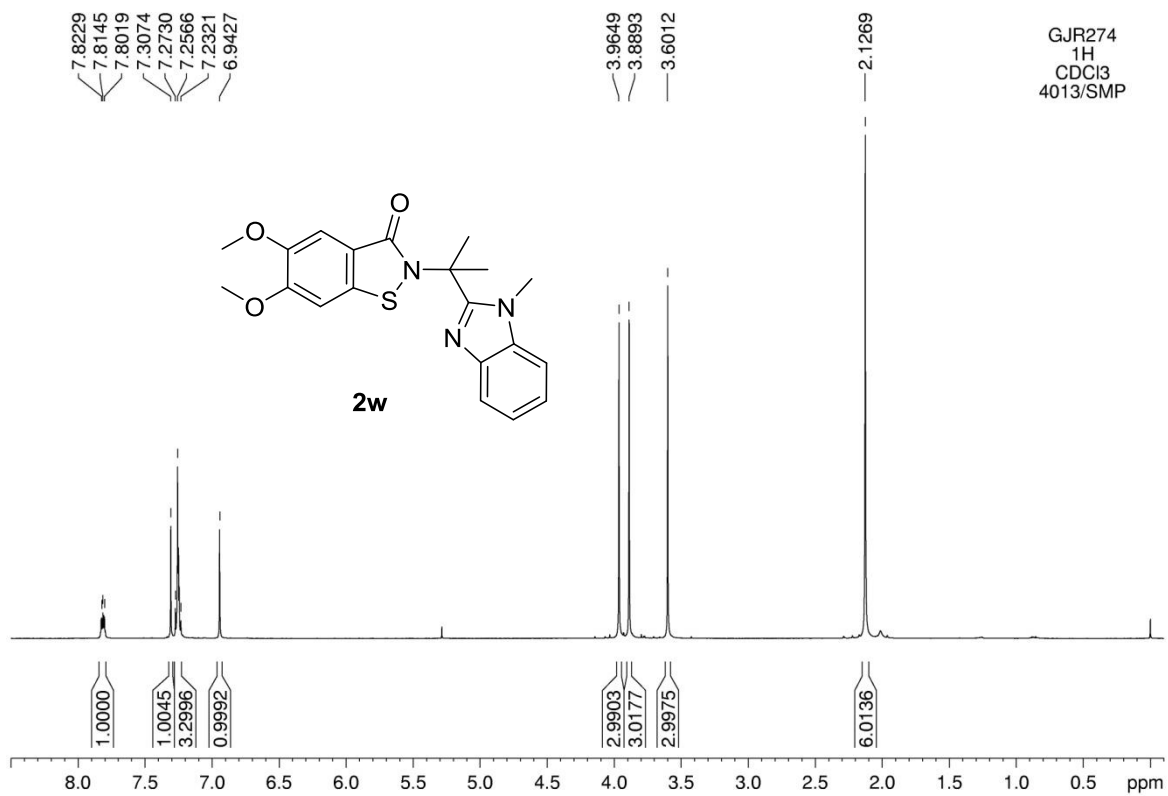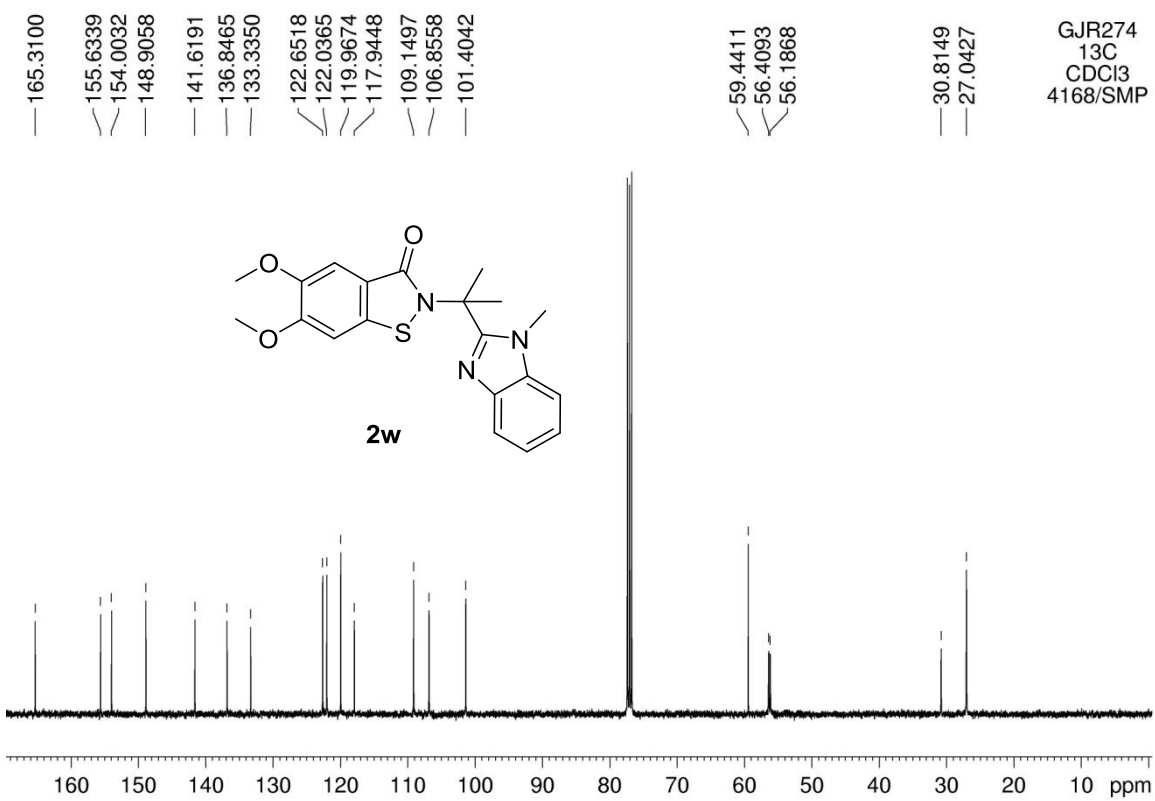



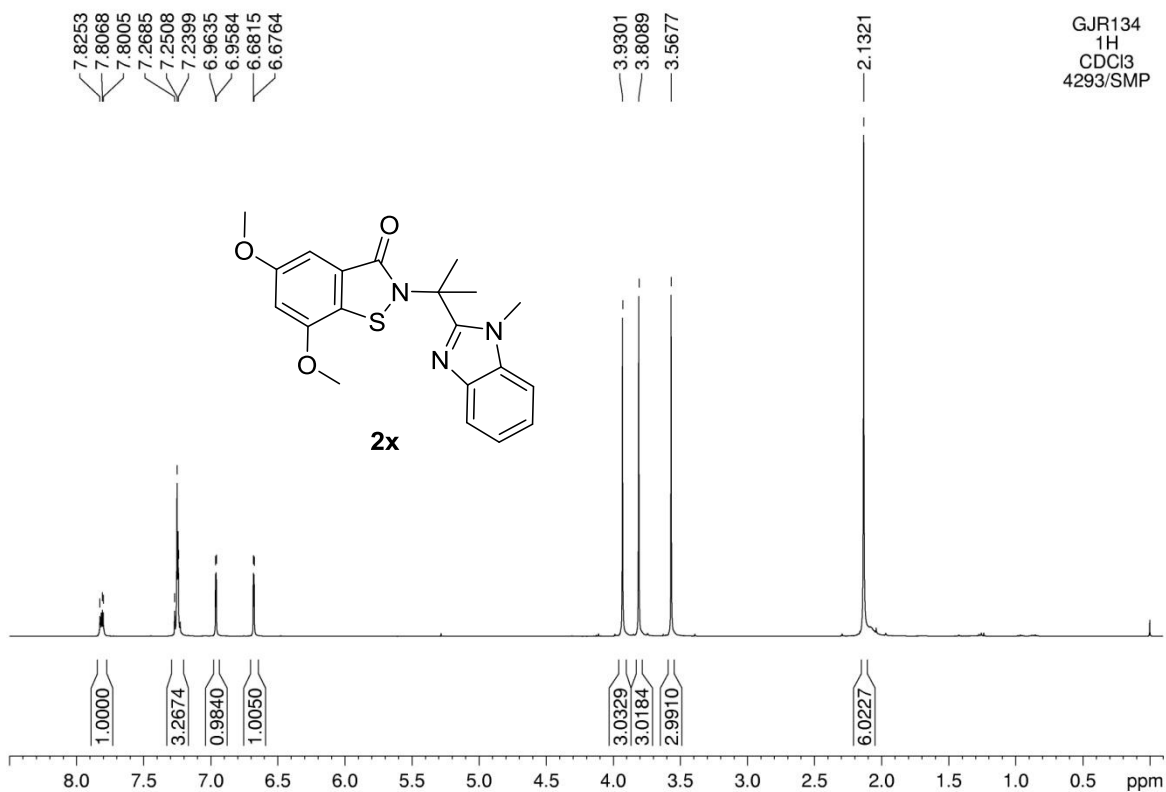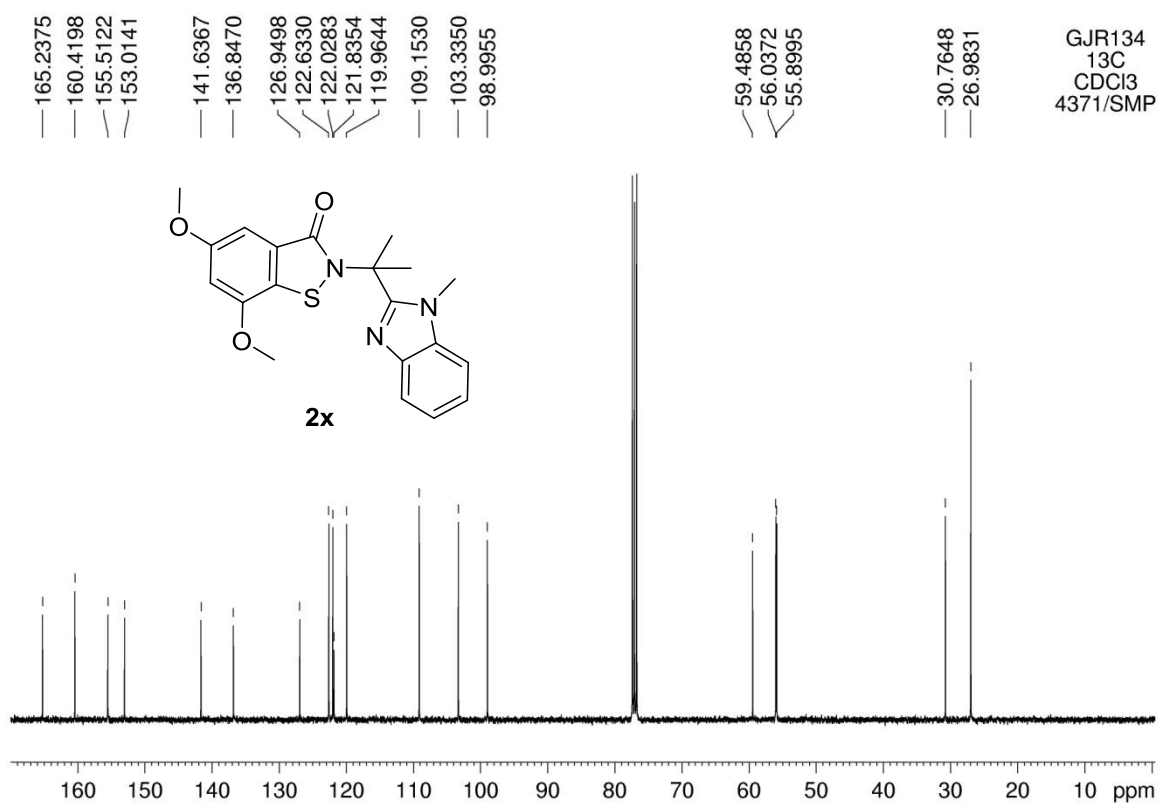

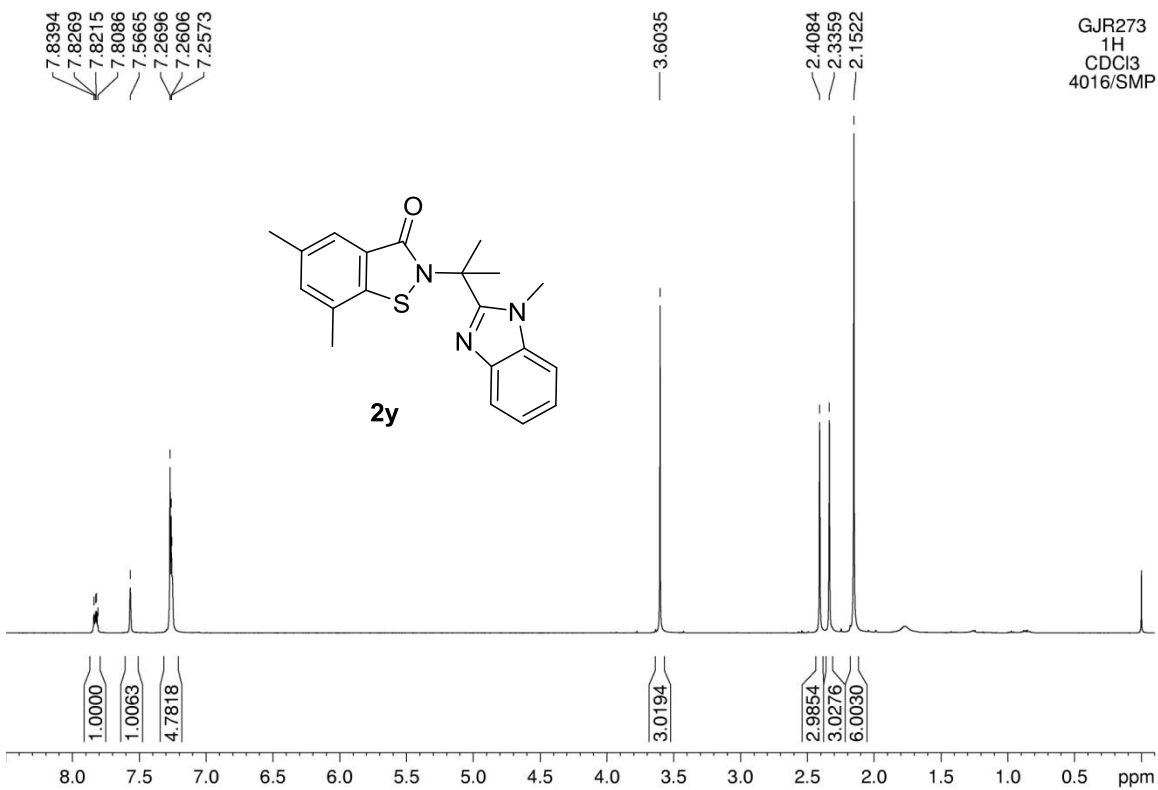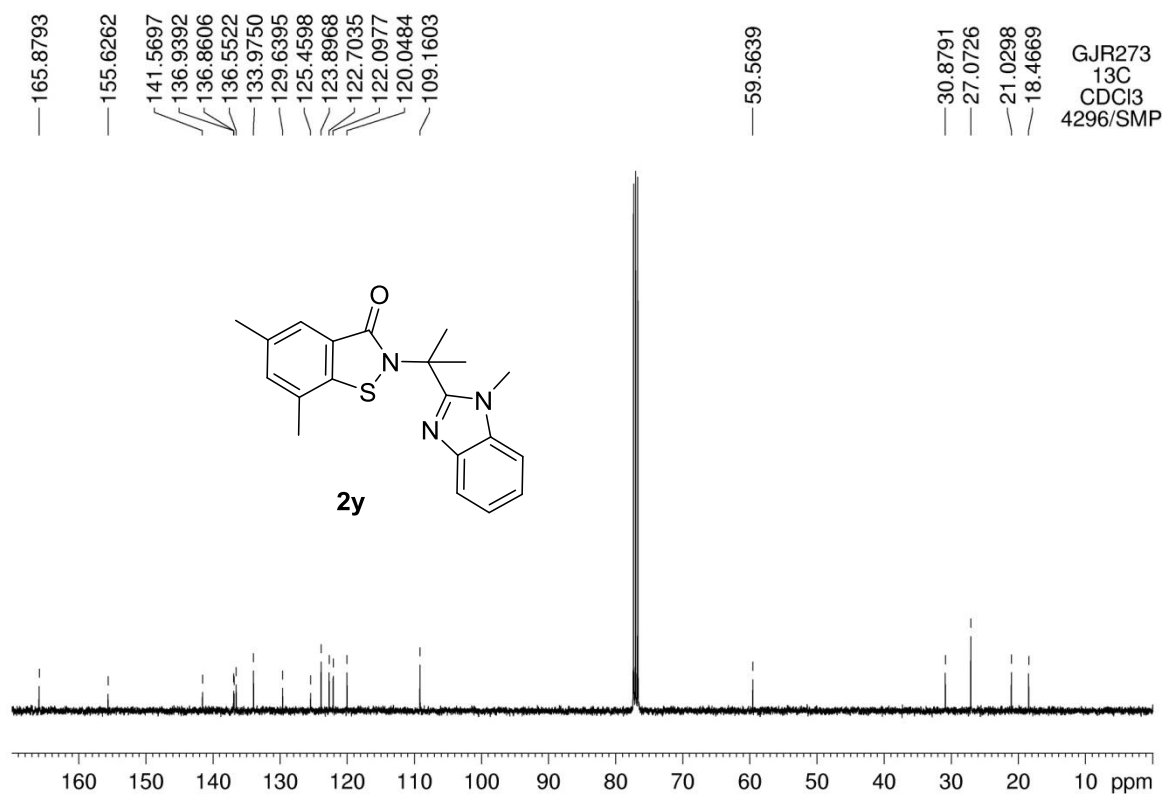

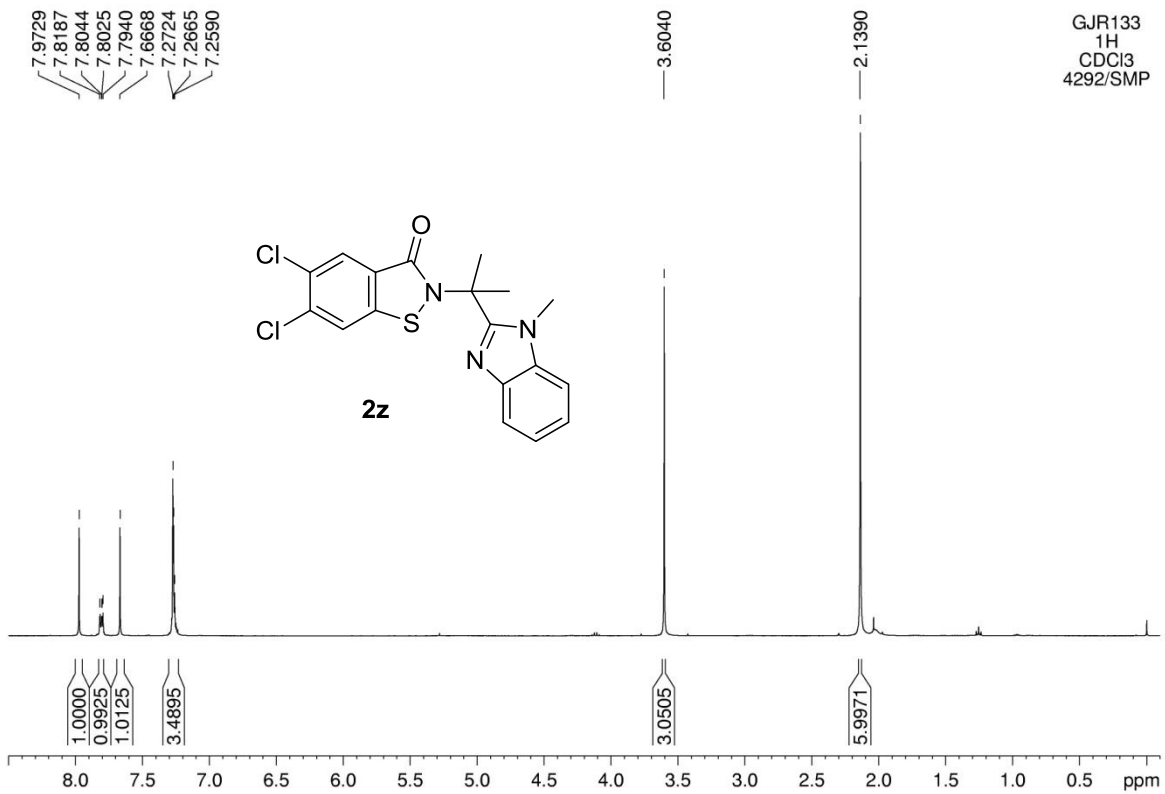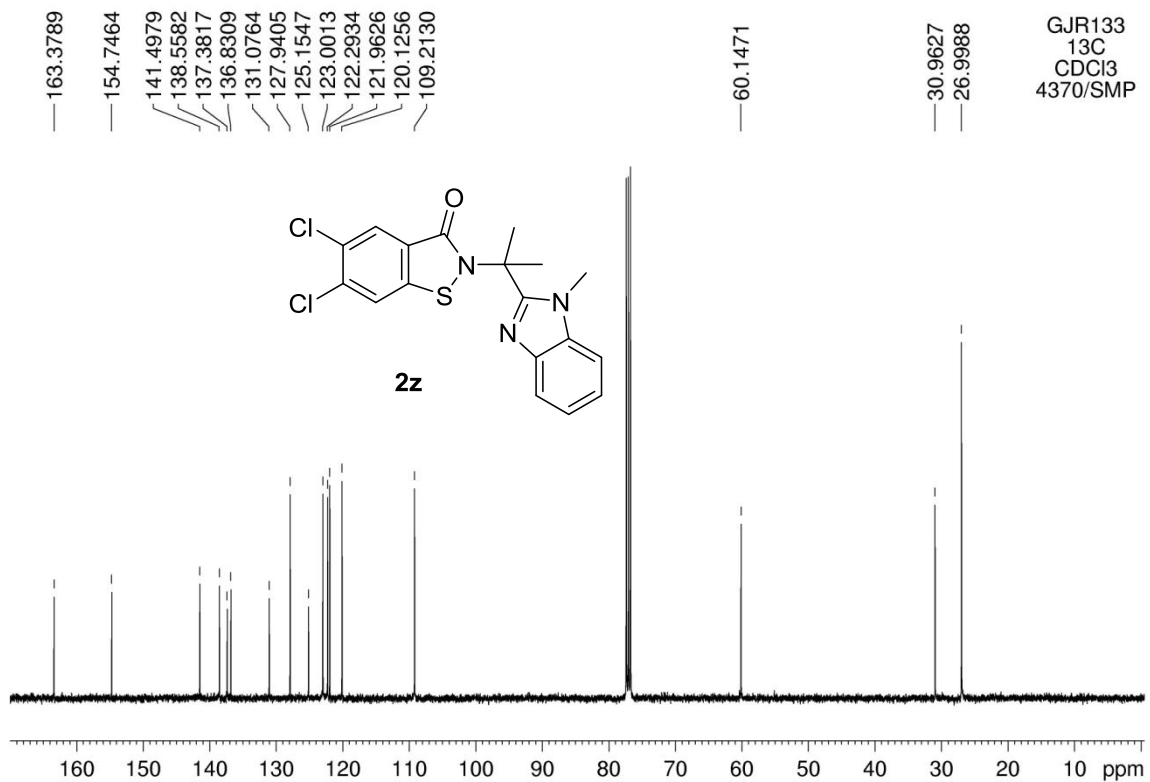

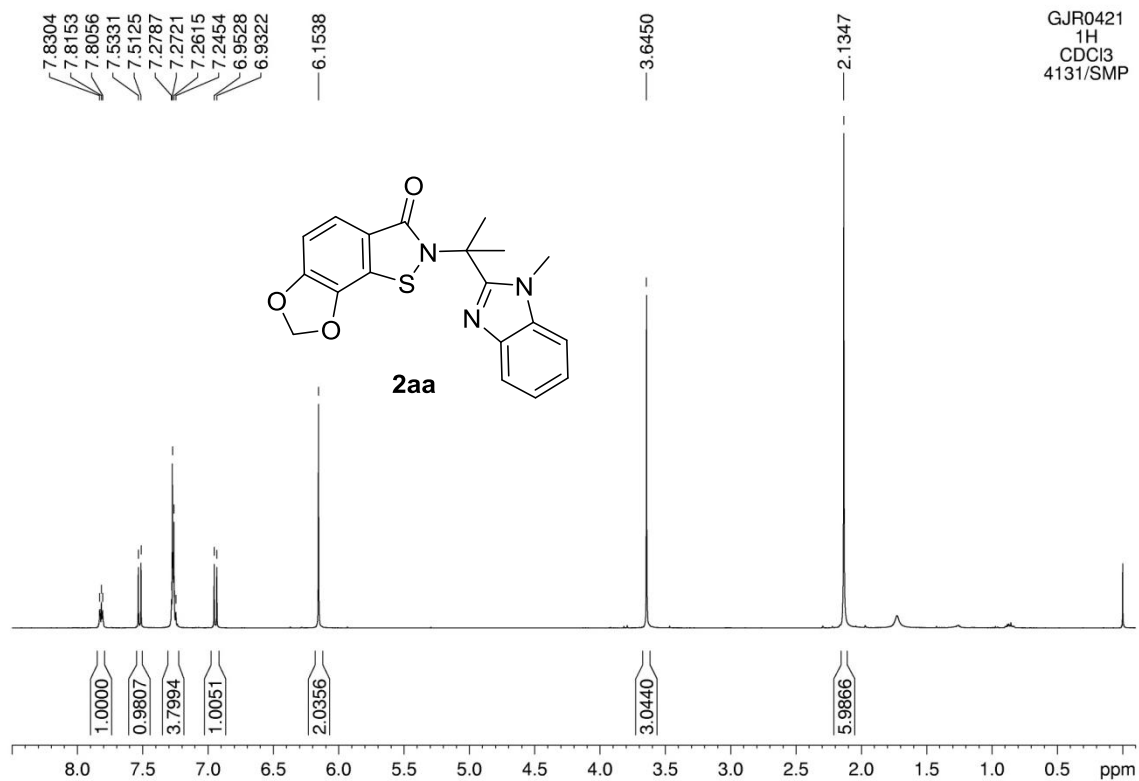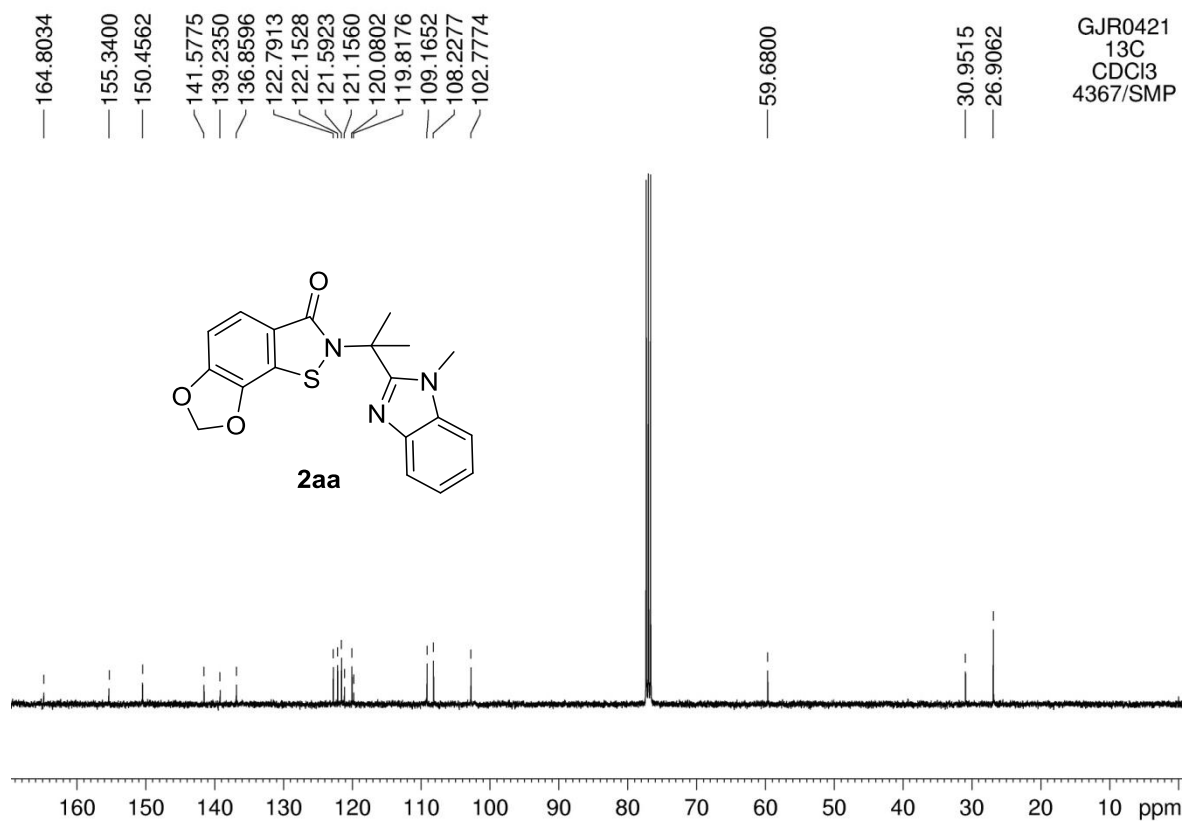

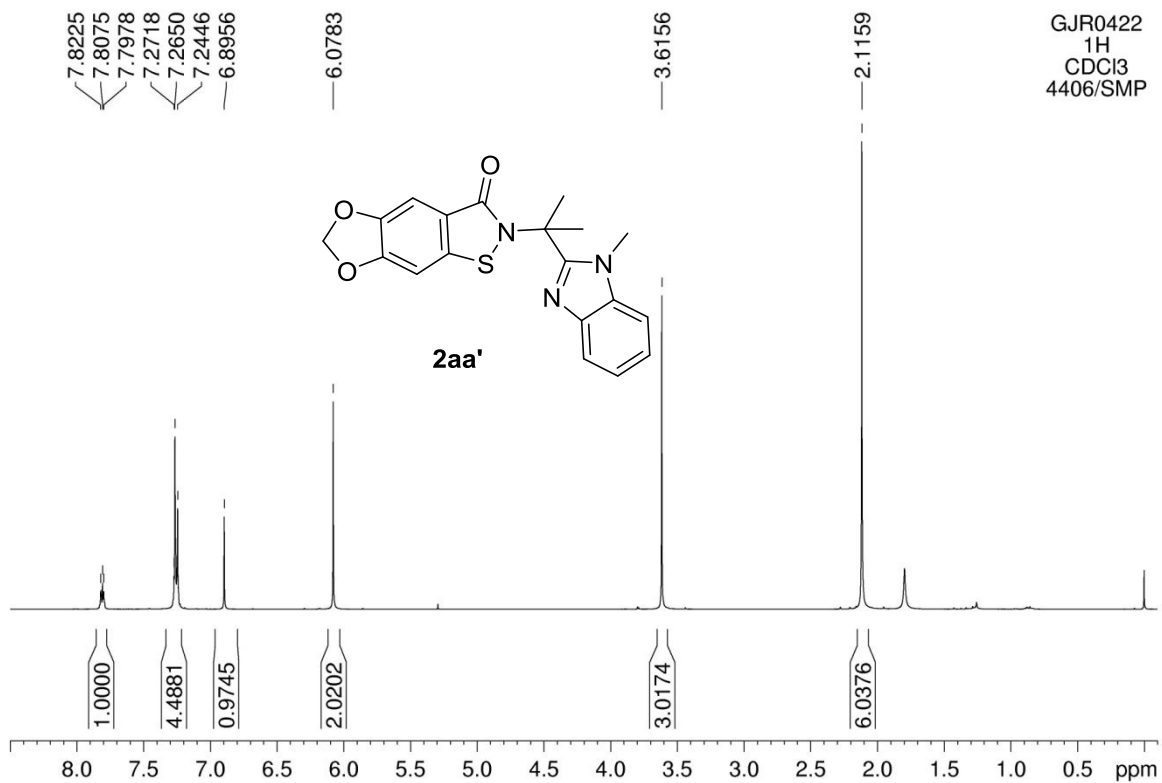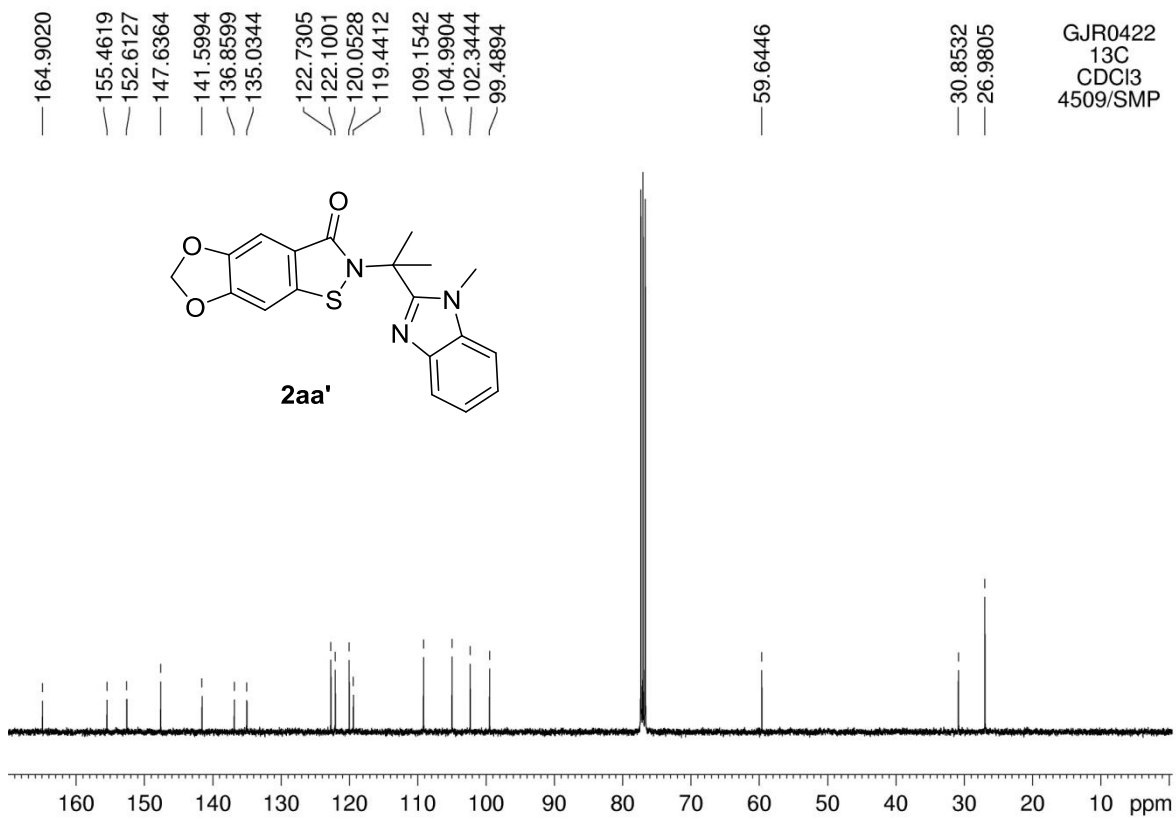

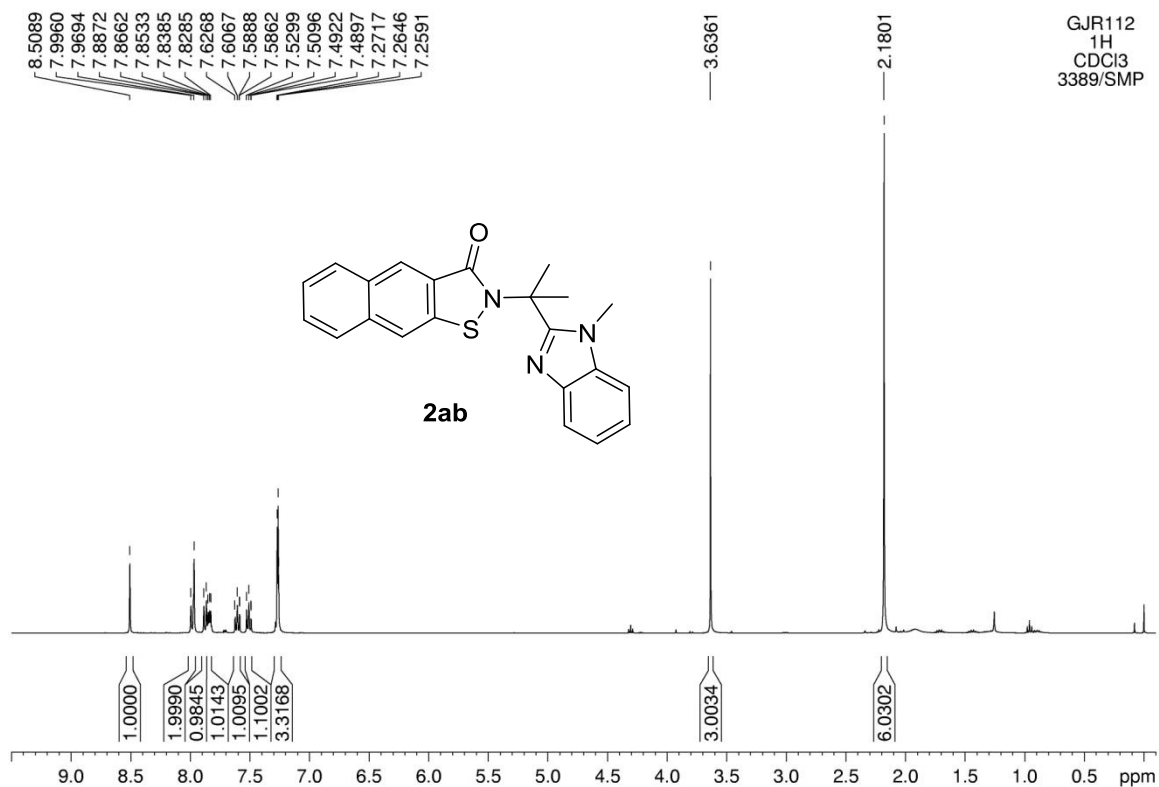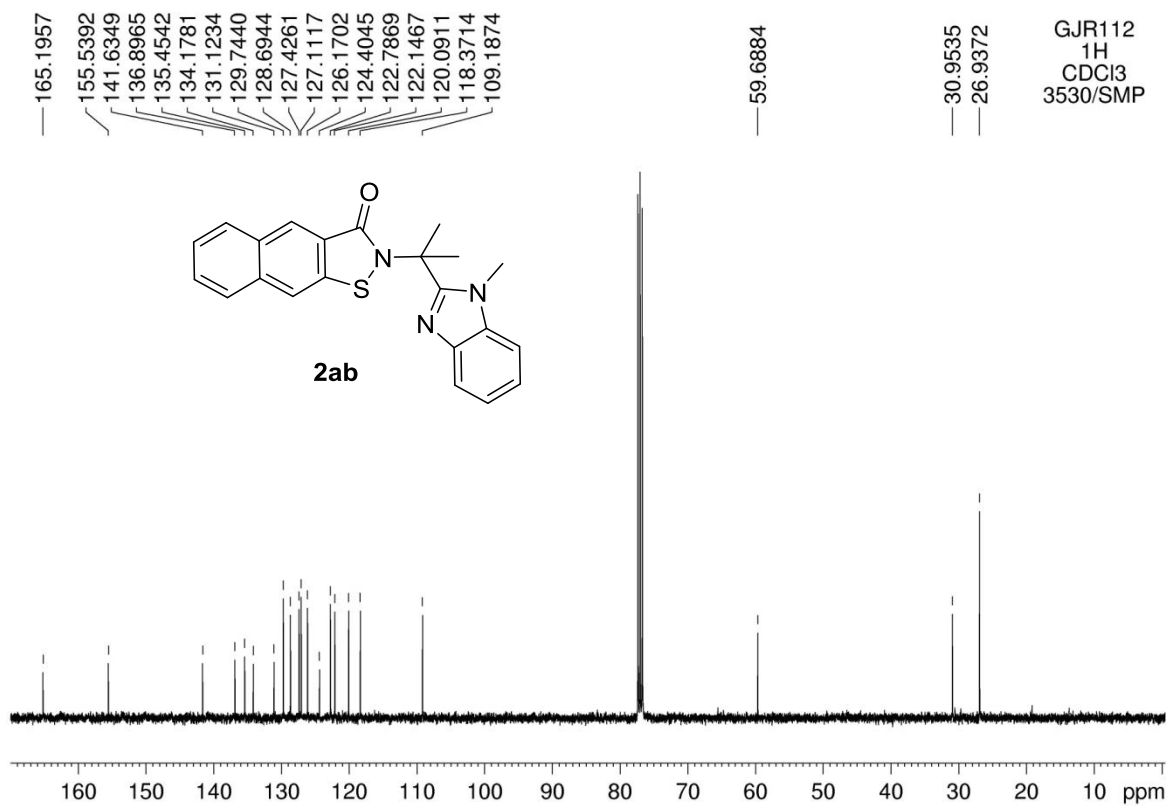

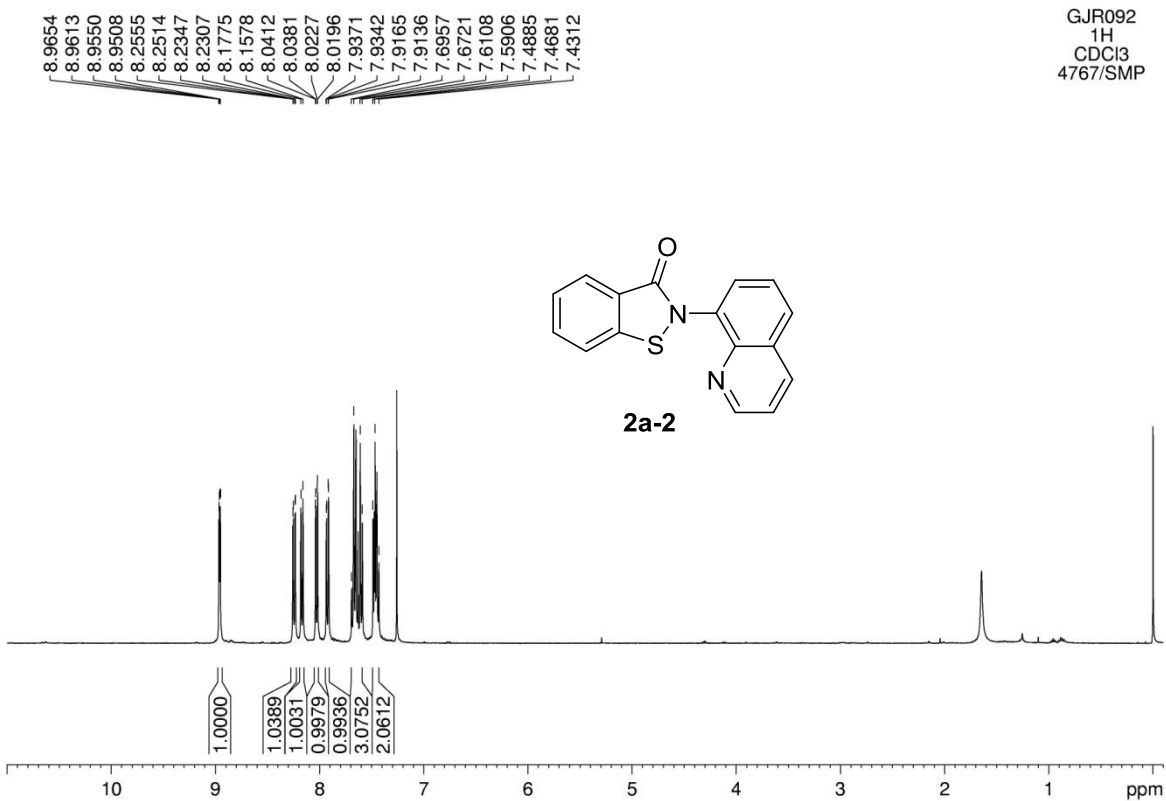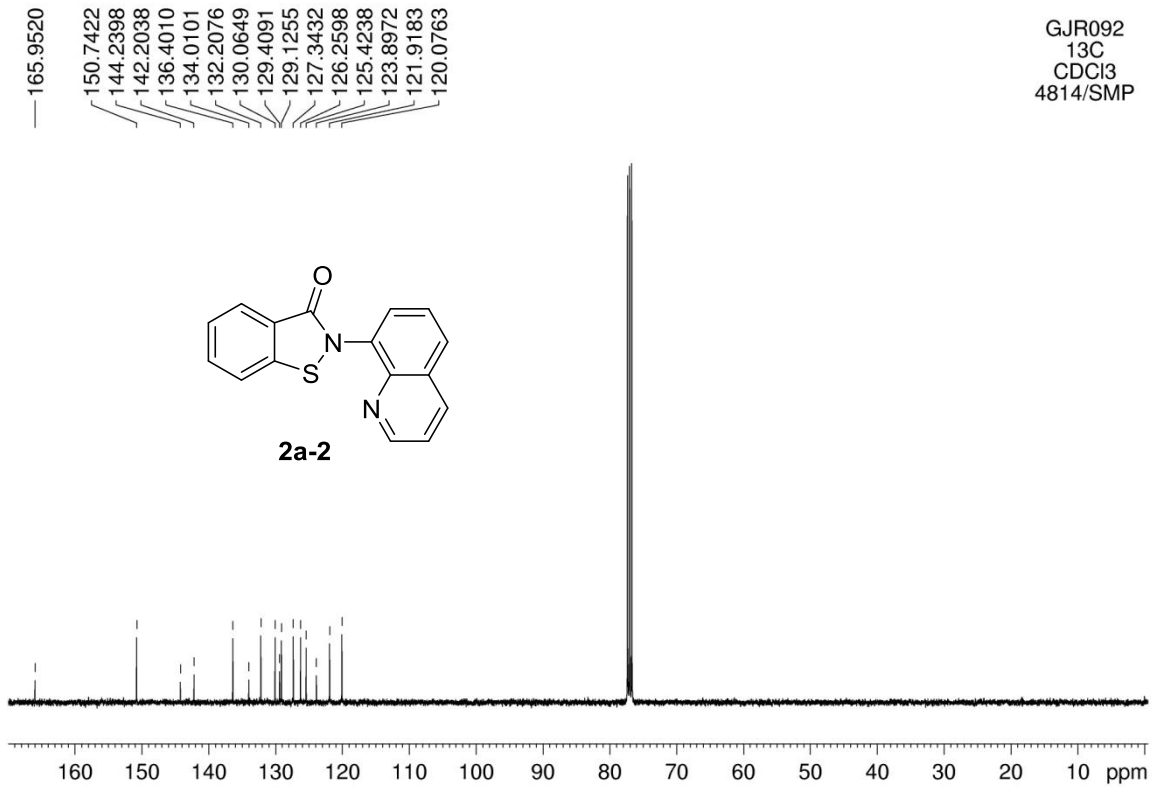

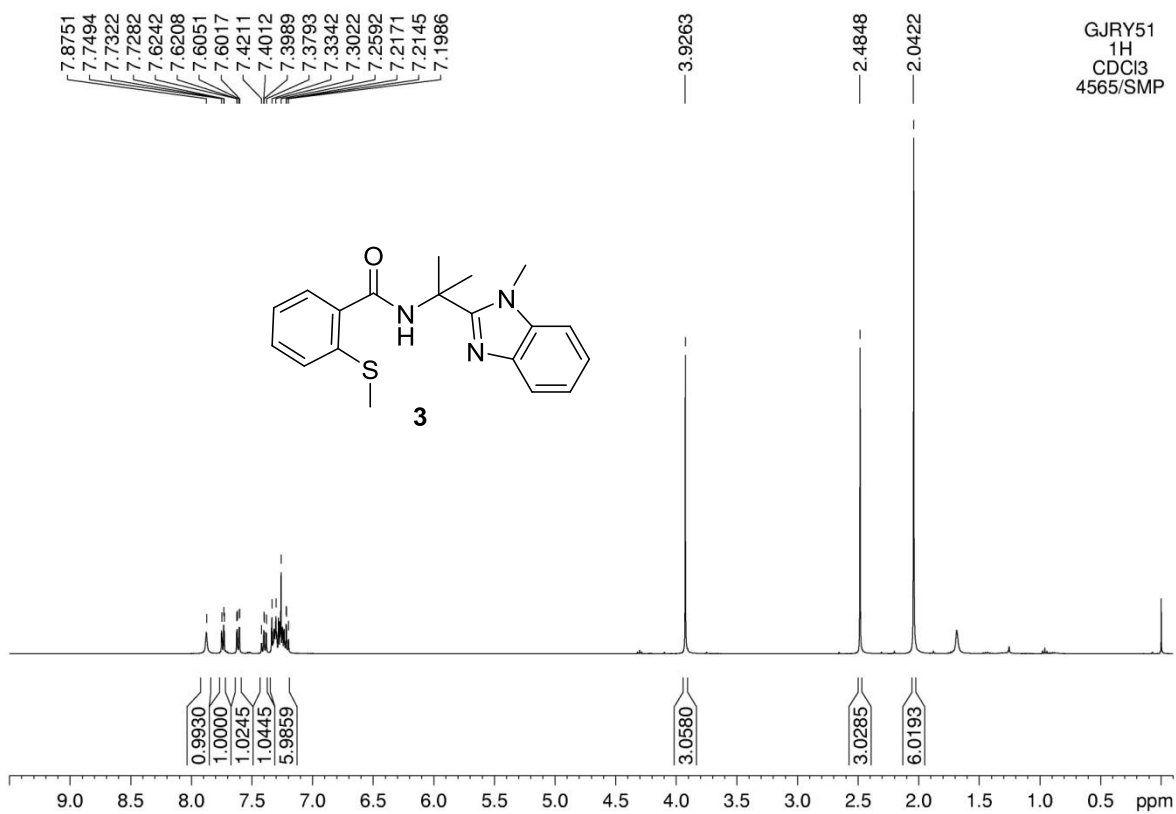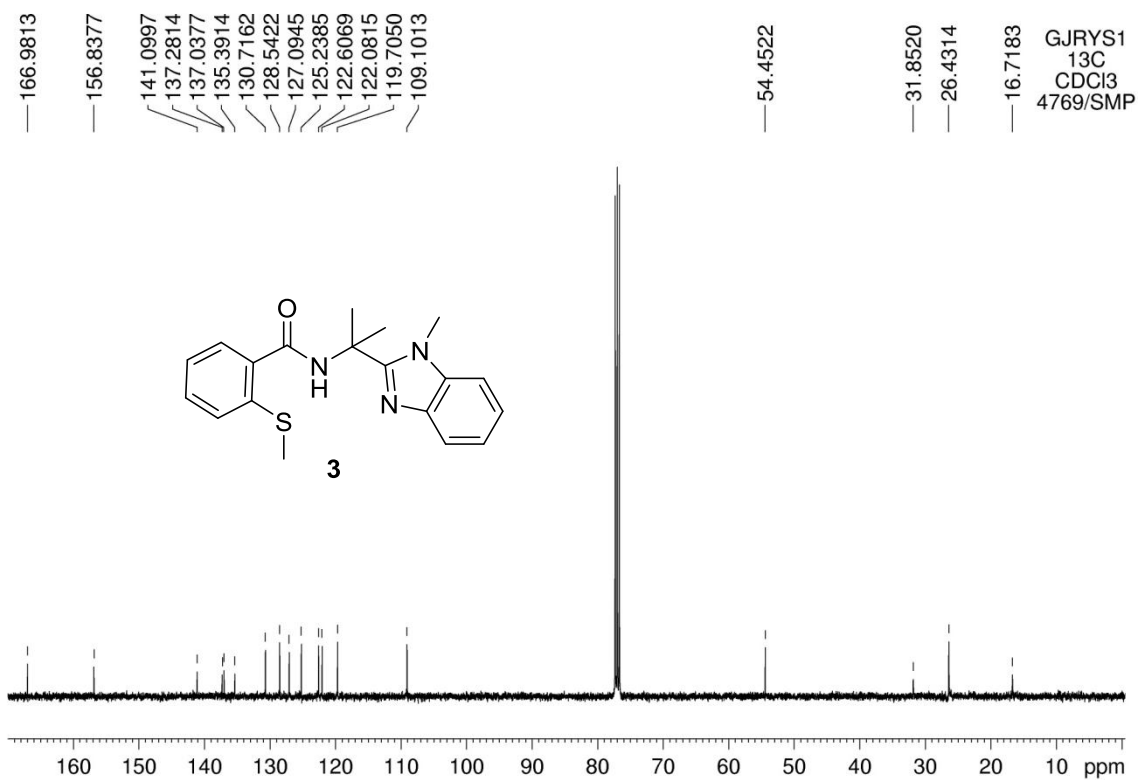



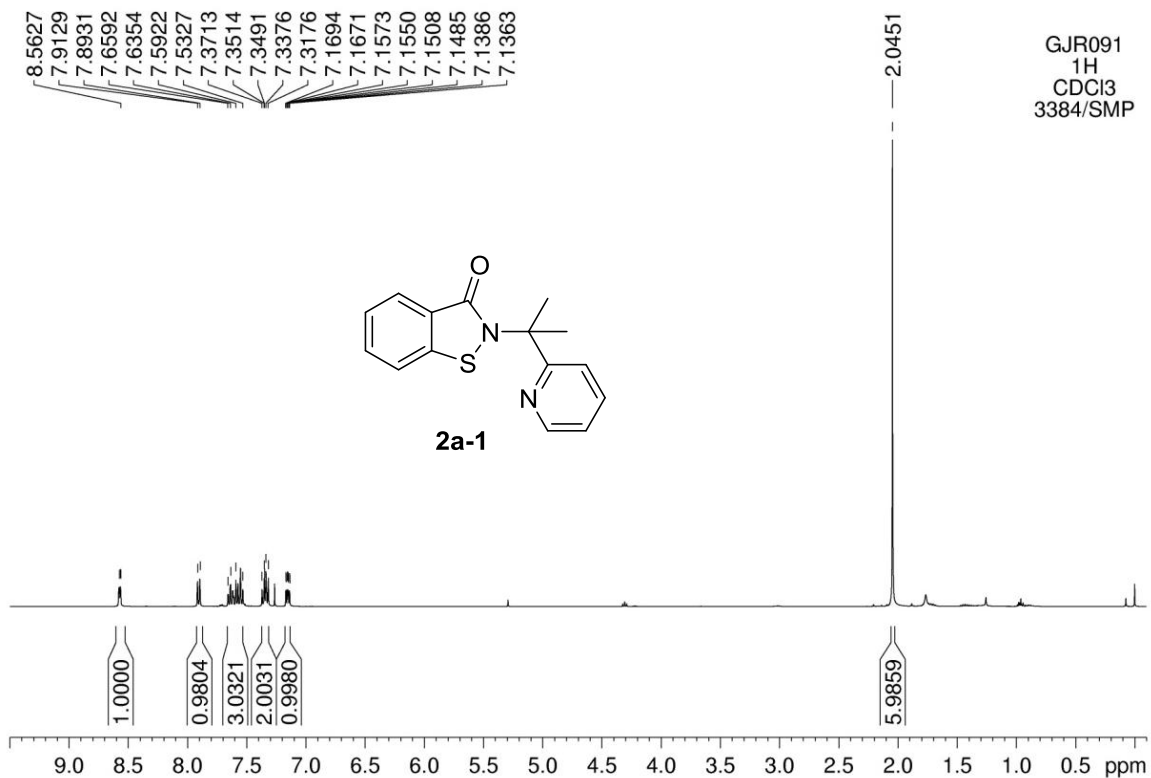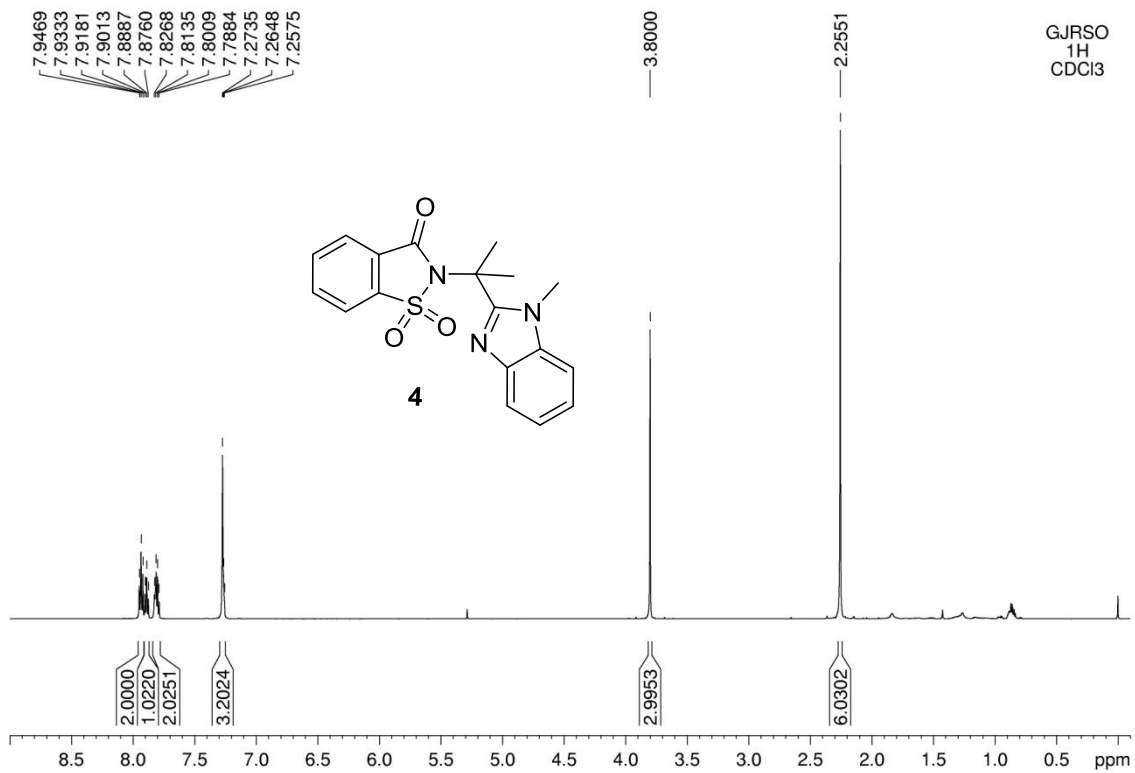

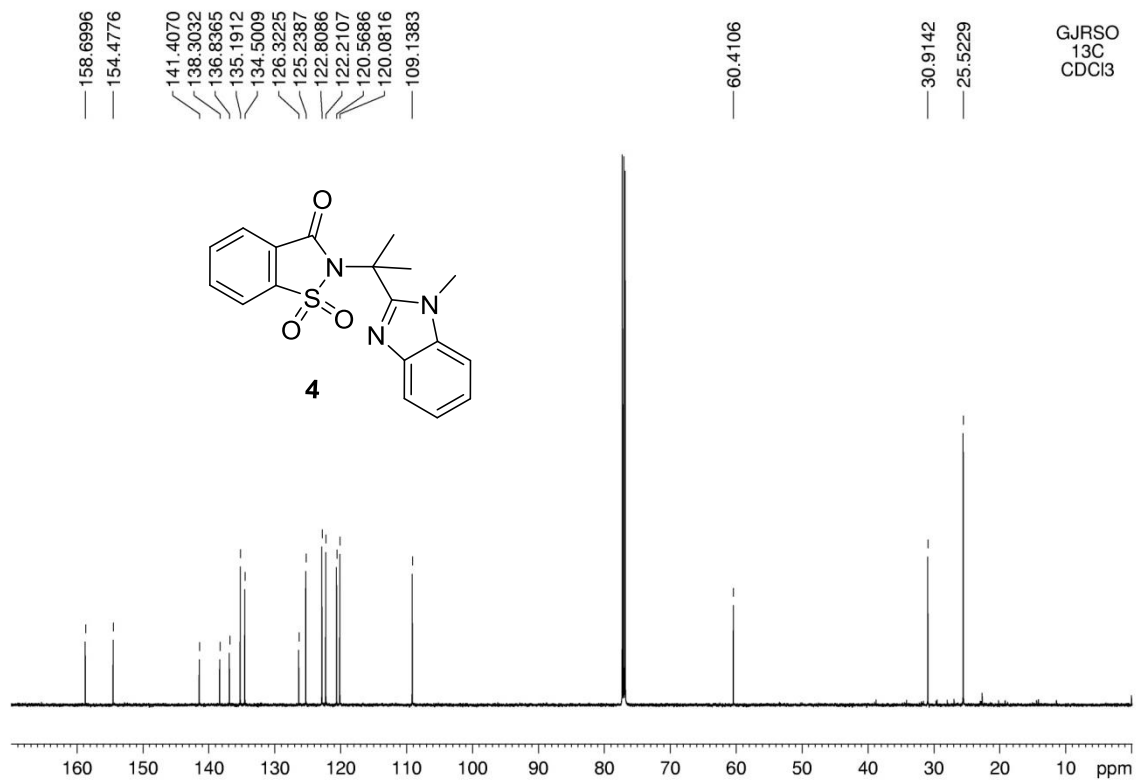

Supplement: c9ob00449a1.pdf [file c9ob00449a1.pdf]
